# Supplementary material for: Six- and seven-coordinate Fe(ii) and Zn(ii) compounds ligated by unsymmetric xanthene-based ligands: characterization and magnetic properties
Source: Royal Society of Chemistry journal article supplement (doi:10.1039/c5qi00298b), 2016-01-01
Supplement: c5qi00298b1.pdf [file c5qi00298b1.pdf]

### Supplementary Information

#### **Six- and seven-coordinate Fe(II) and Zn(II) compounds ligated by unsymmetric xanthene-based ligands: characterization and magnetic properties**

Ruth M. Haas,<sup>a</sup> Muhammad Arshad,<sup>b,‡</sup> James Anthony,<sup>b</sup> Philipp J. Altmann,<sup>a</sup> Alexander Pöthig,<sup>a</sup> Frank H. Köhler<sup>a</sup> and  
Corinna R. Hess<sup>a,\*</sup>

<sup>a</sup>. Technische Universität München, Department of Chemistry and Catalysis Research Center, Lichtenbergstraße 4,  
85748 Garching, Germany.

<sup>b</sup>. Durham University, Department of Chemistry, South Road, Durham, DH1 3LE, UK.

‡ current address: Institute of Chemistry, University of the Punjab, Quaid-i-Azam Campus, Lahore-54590, Pakistan.

\*Email: corinna.hess@ch.tum.de

**Figure S1.**  $^1\text{H}$  NMR (400 MHz,  $\text{CDCl}_3$ ) spectrum of *tert*-butyl (5-amino-2,7-di-*tert*-butyl-9,9-dimethyl-xanthen-4-yl)carbamate (**1**).

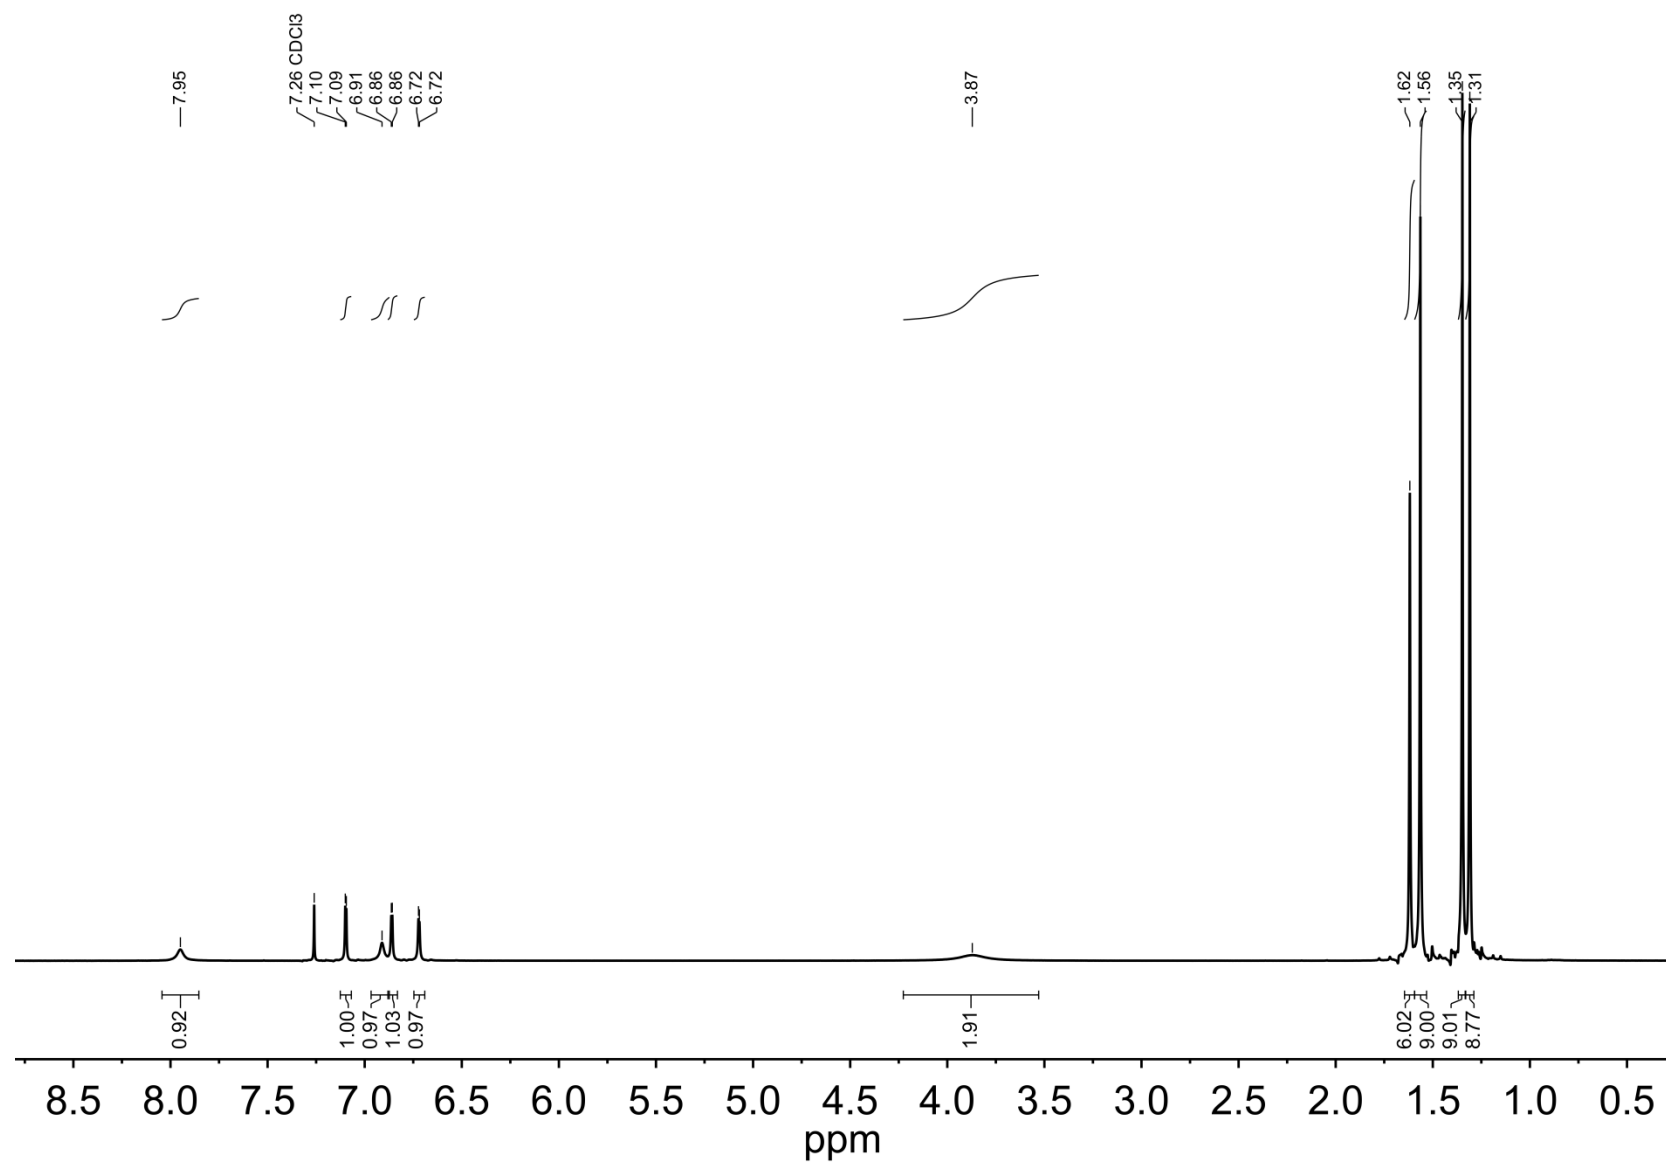

**Figure S2.**  $^{13}\text{C}$  NMR (100 MHz,  $\text{CDCl}_3$ ) spectrum of *tert*-butyl (5-amino-2,7-di-*tert*-butyl-9,9-dimethyl-xanthen-4-yl)carbamate (**1**).

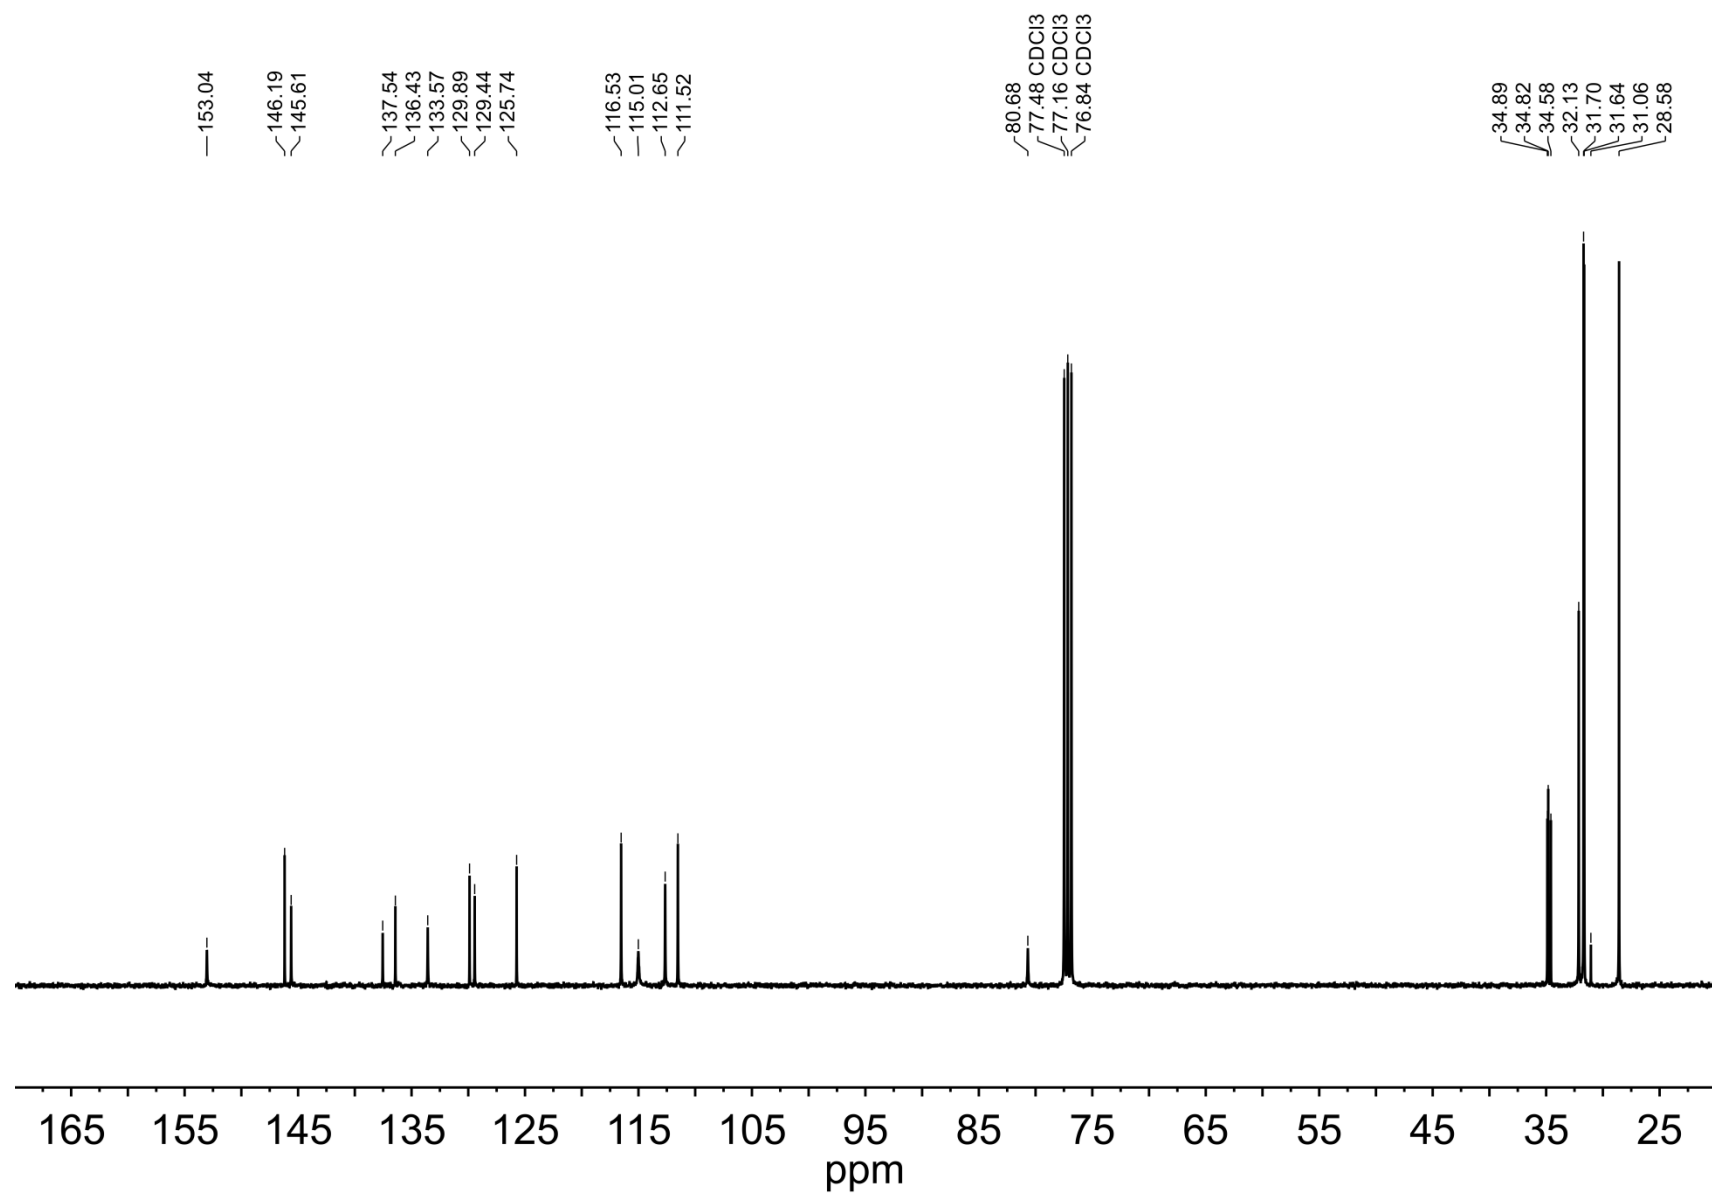

**Figure S3.**  $^1\text{H}$  NMR (400 MHz,  $\text{CDCl}_3$ ) spectrum of *tert*-butyl (2,7-di-*tert*-butyl-9,9-dimethyl-5-((pyridin-2-ylmethyl)amino)-xanthen-4-yl)carbamate (**2a**).

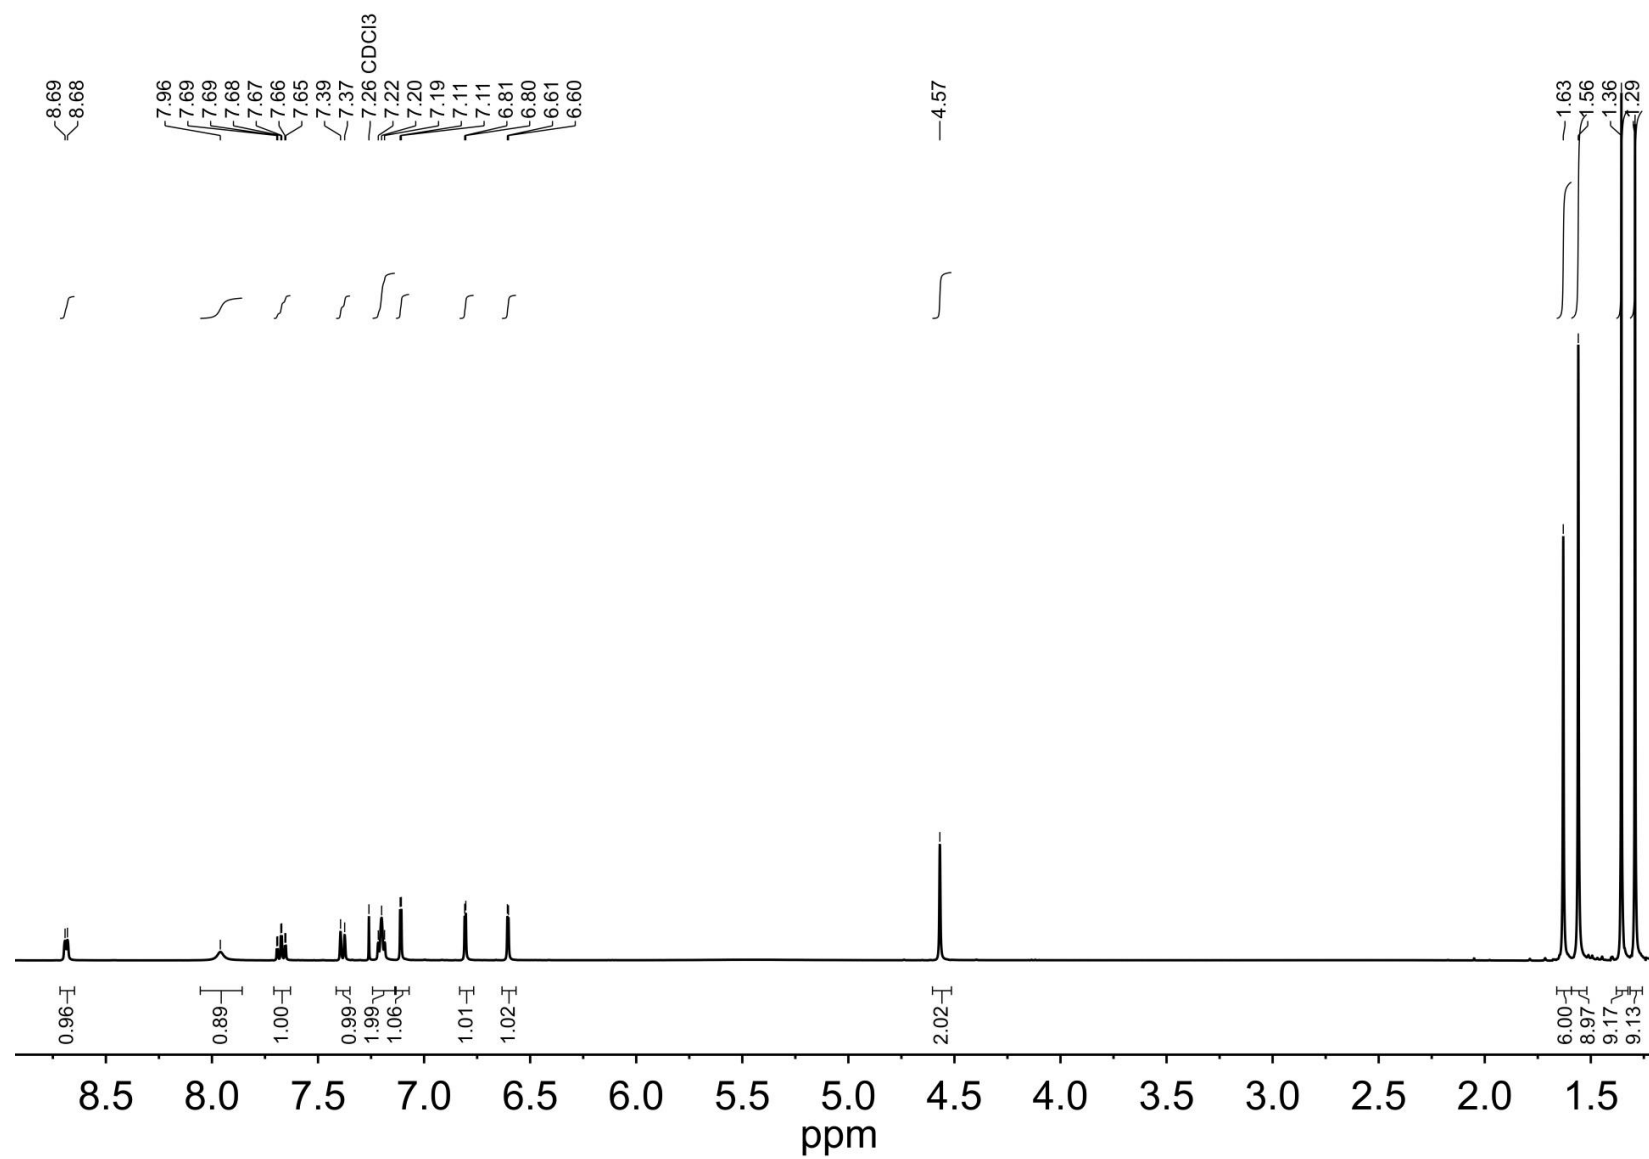

**Figure S4.**  $^{13}\text{C}$  NMR (100 MHz,  $\text{CDCl}_3$ ) spectrum of *tert*-butyl (2,7-di-*tert*-butyl-9,9-dimethyl-5-((pyridin-2-ylmethyl)amino)-xanthen-4-yl)carbamate (**2a**).

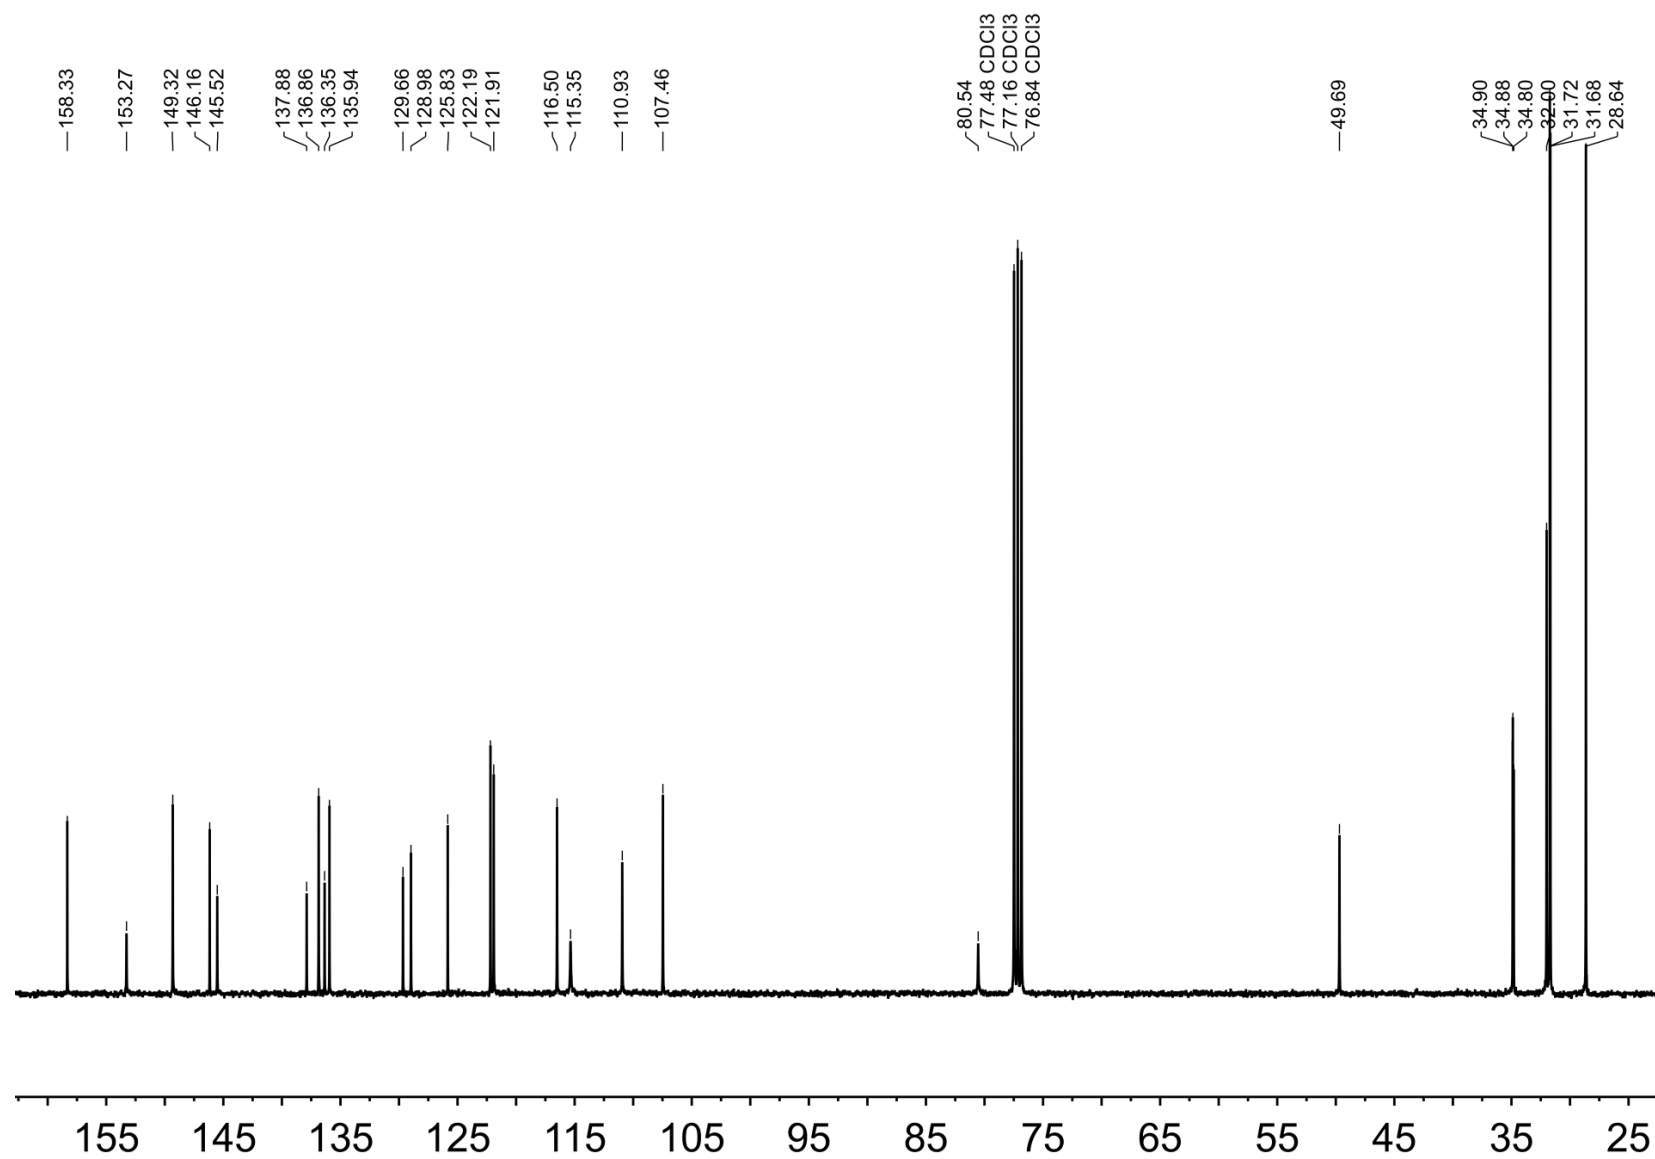

**Figure S5.**  $^1\text{H}$  NMR (400 MHz,  $\text{CDCl}_3$ ) spectrum of *tert*-butyl (5-(bis(pyridin-2-ylmethyl)amino)-2,7-di-*tert*-butyl-9,9-dimethyl-xanthen-4-yl)carbamate (**2b**).

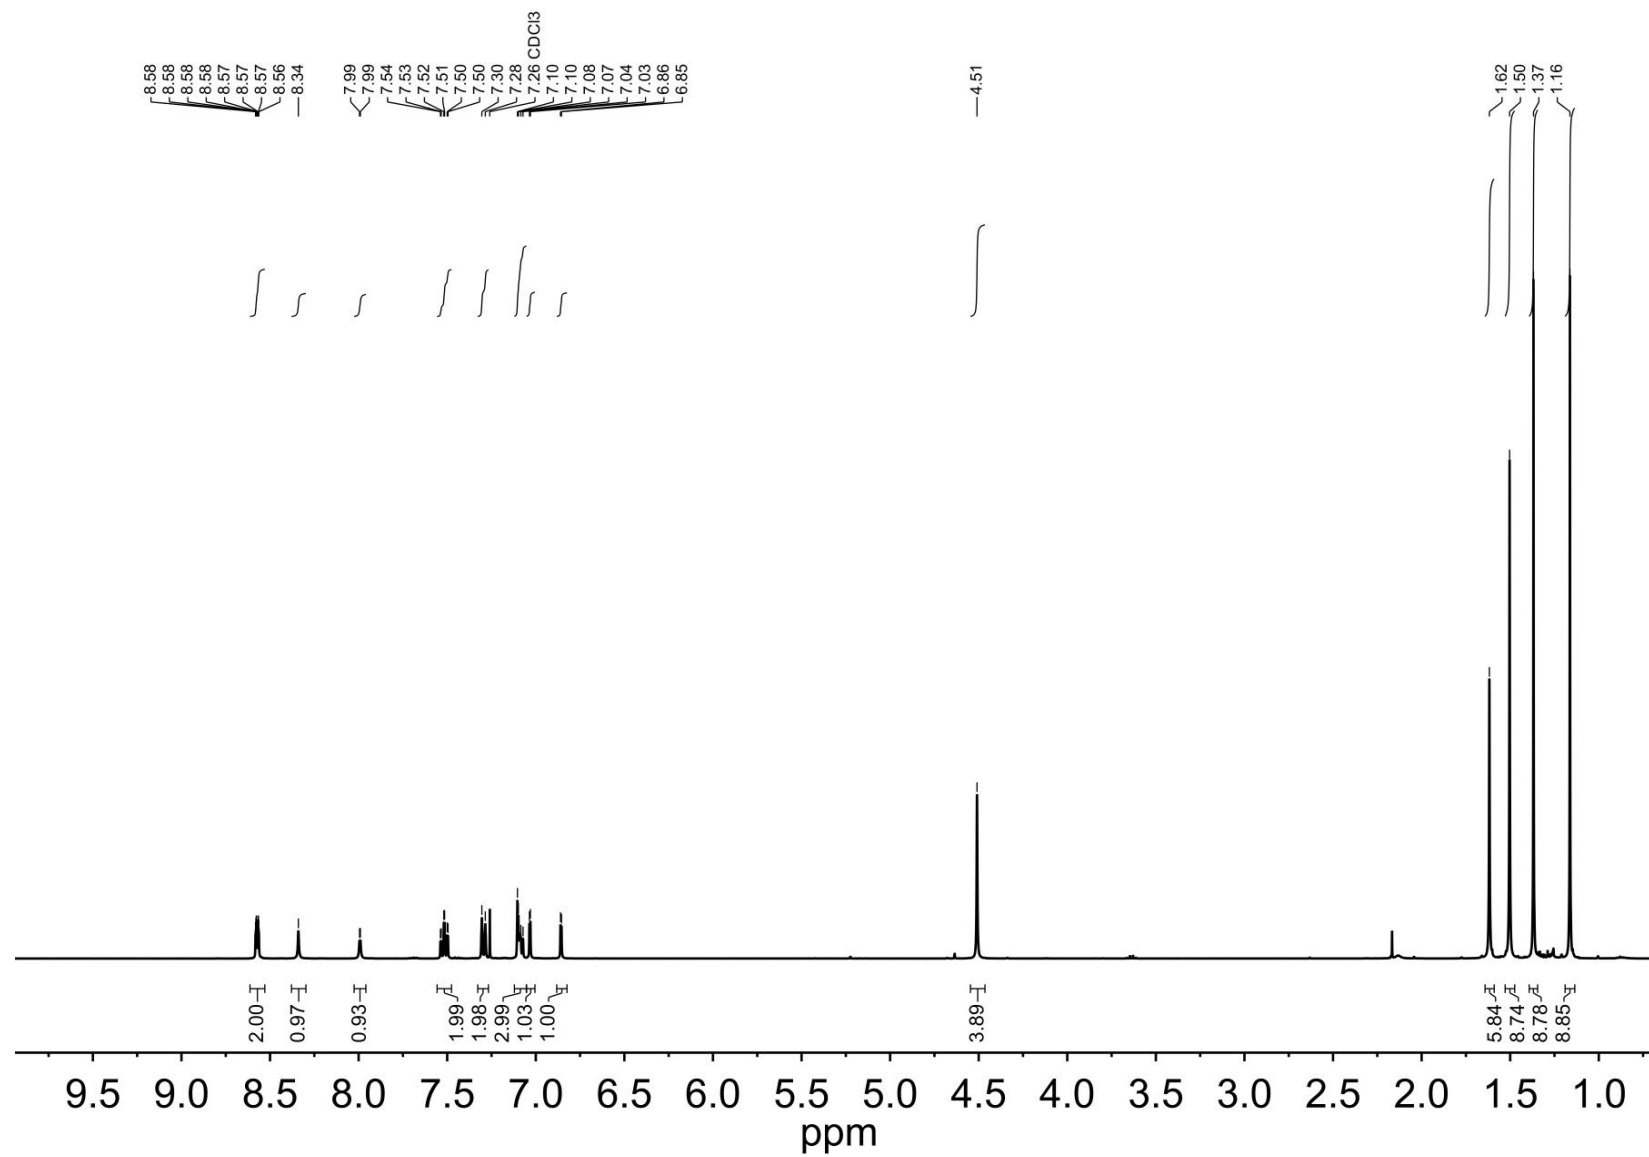

**Figure S6.**  $^{13}\text{C}$  NMR (100 MHz,  $\text{CDCl}_3$ ) spectrum of *tert*-butyl (5-(bis(pyridin-2-ylmethyl)amino)-2,7-di-*tert*-butyl-9,9-dimethyl-xanthen-4-yl)carbamate (**2b**).

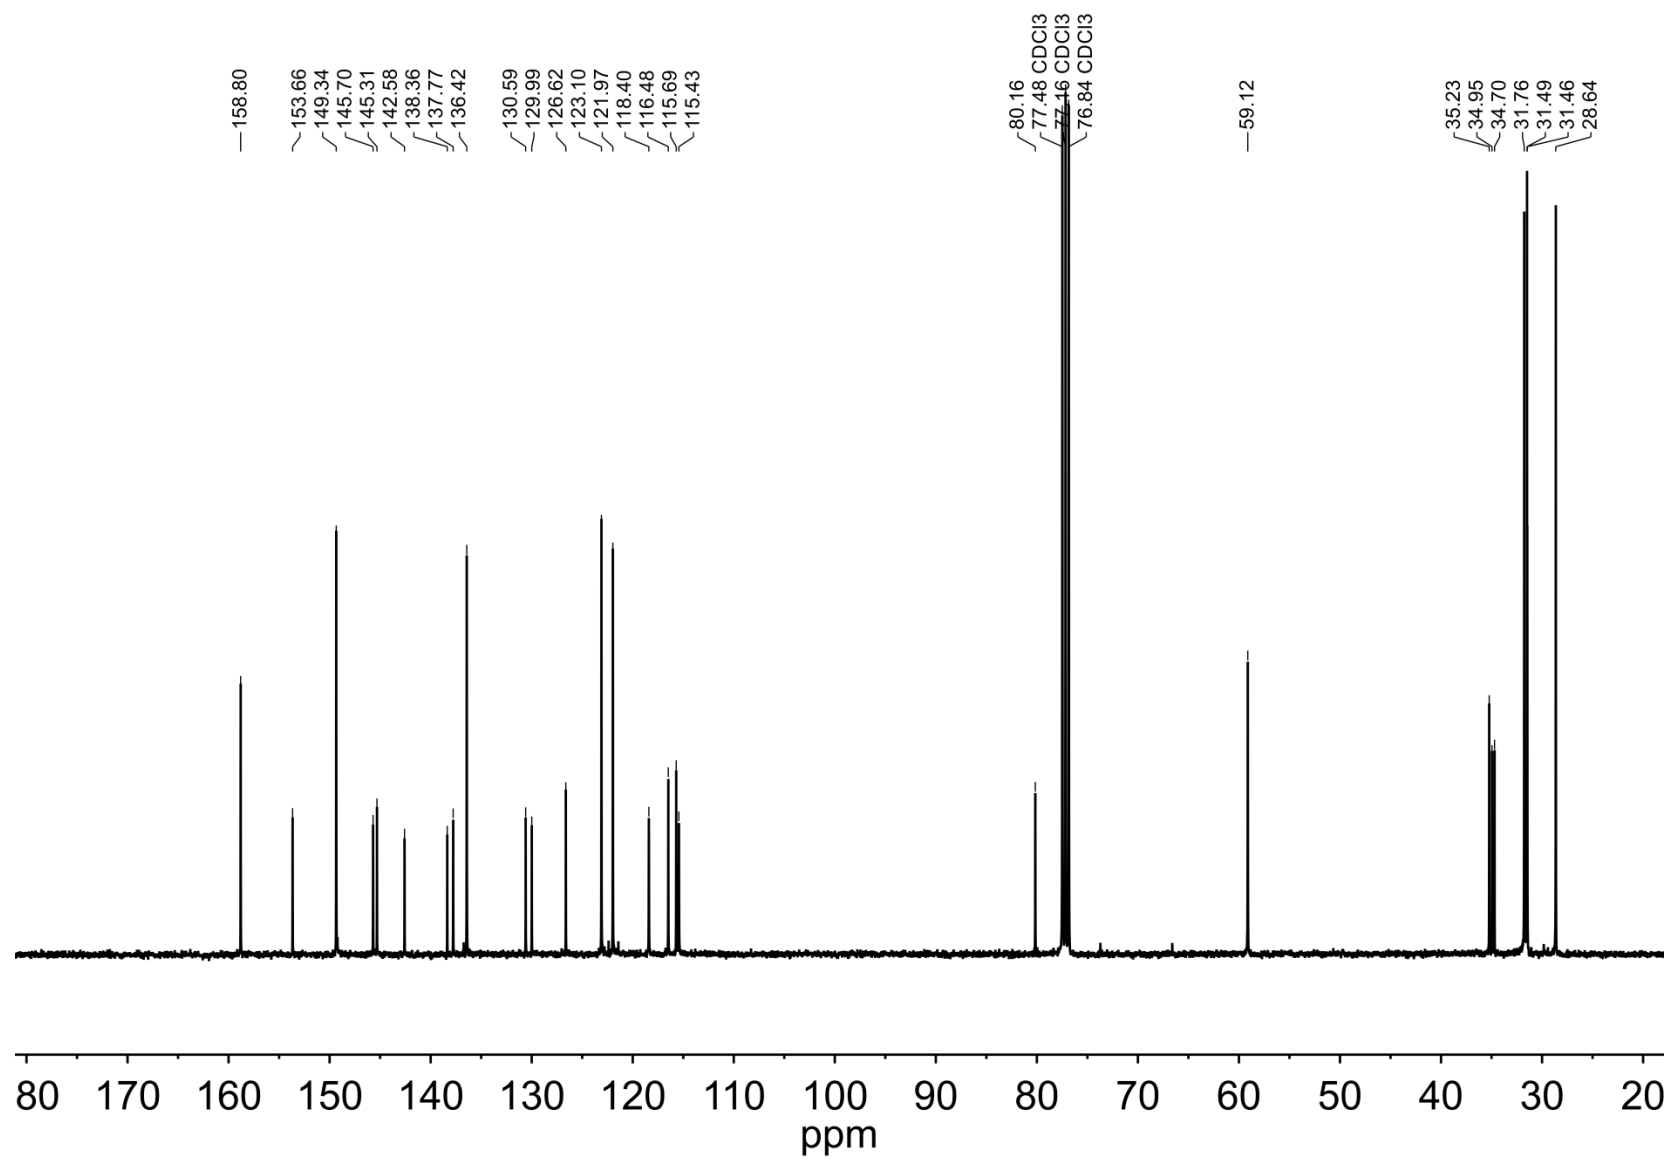

**Figure S7.**  $^1\text{H}$  NMR (400 MHz,  $\text{CDCl}_3$ ) spectrum of 2,7-di-*tert*-butyl-9,9-dimethyl-N-(pyridin-2-ylmethyl)-xanthene-4,5-diamine (**3a**).

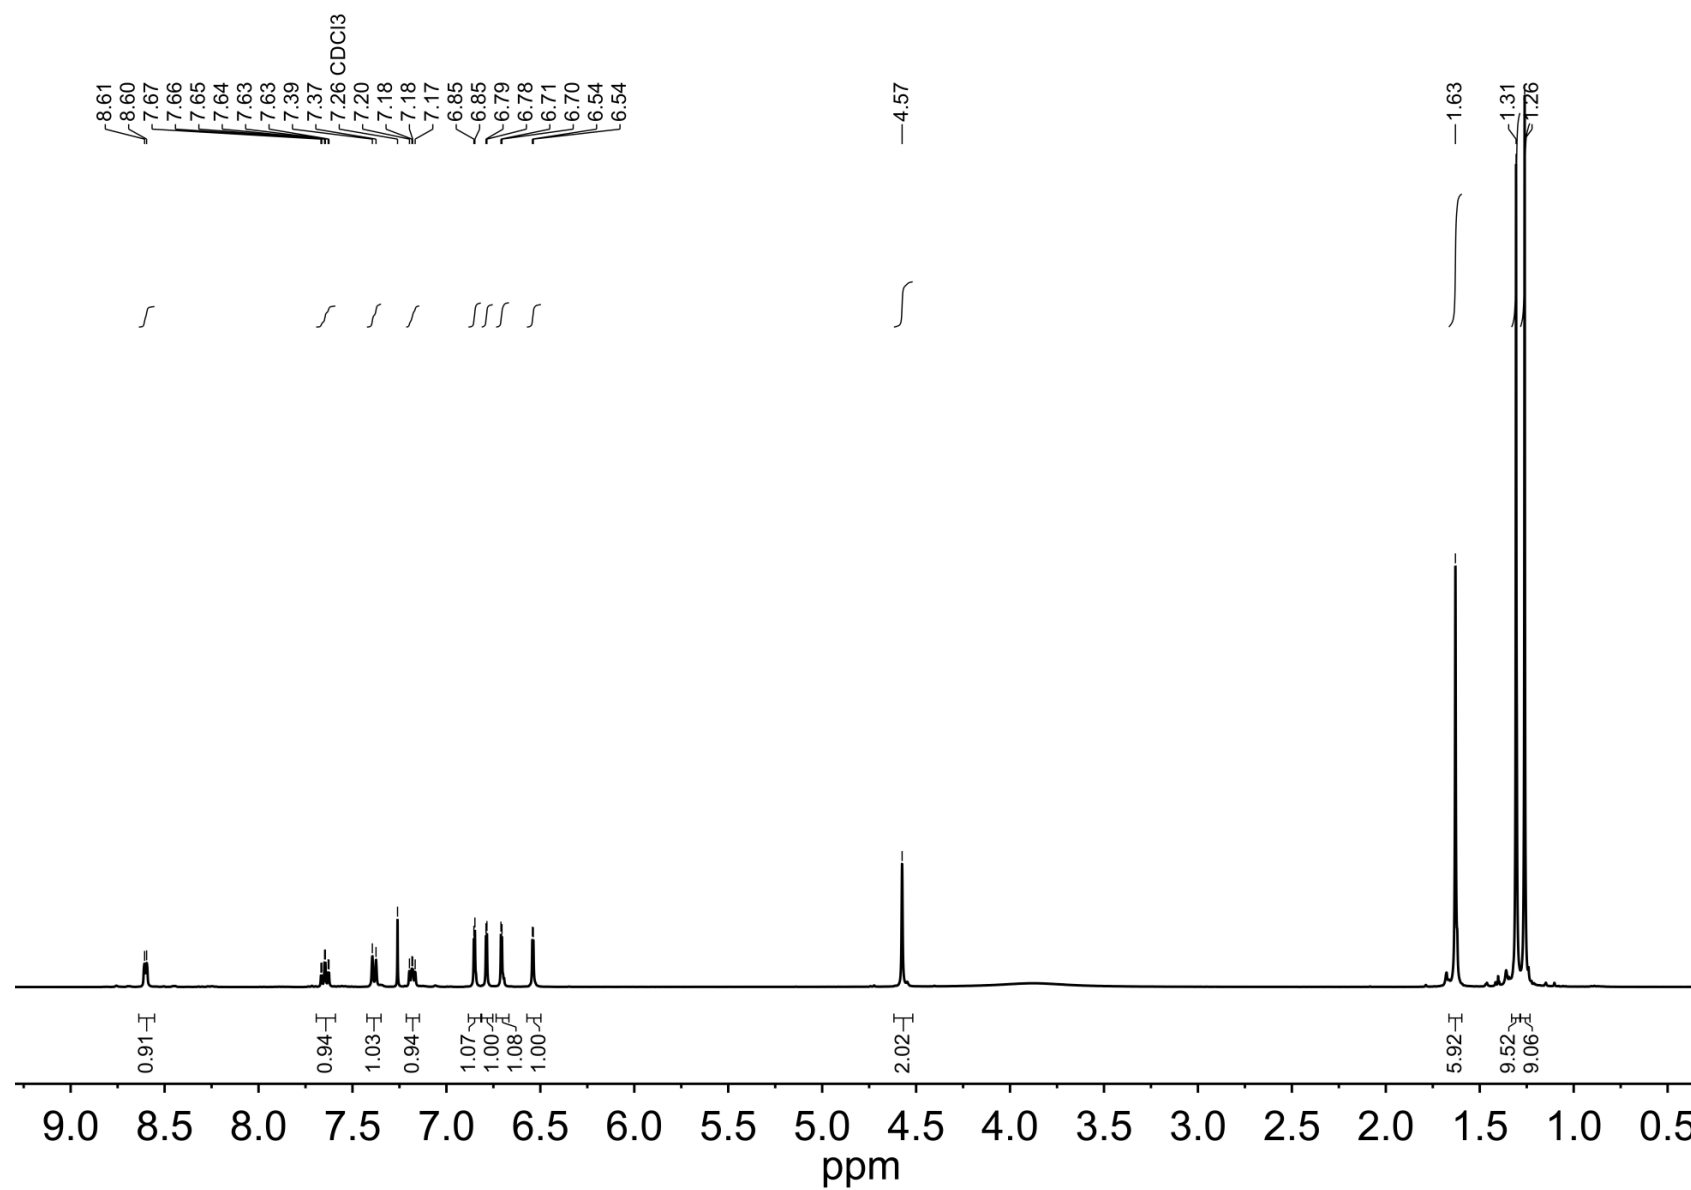



**Figure S8.**  $^{13}\text{C}$  NMR (100 MHz,  $\text{CDCl}_3$ ) spectrum of 2,7-di-*tert*-butyl-9,9-dimethyl-N-(pyridin-2-ylmethyl)-xanthene-4,5-diamine (**3a**).

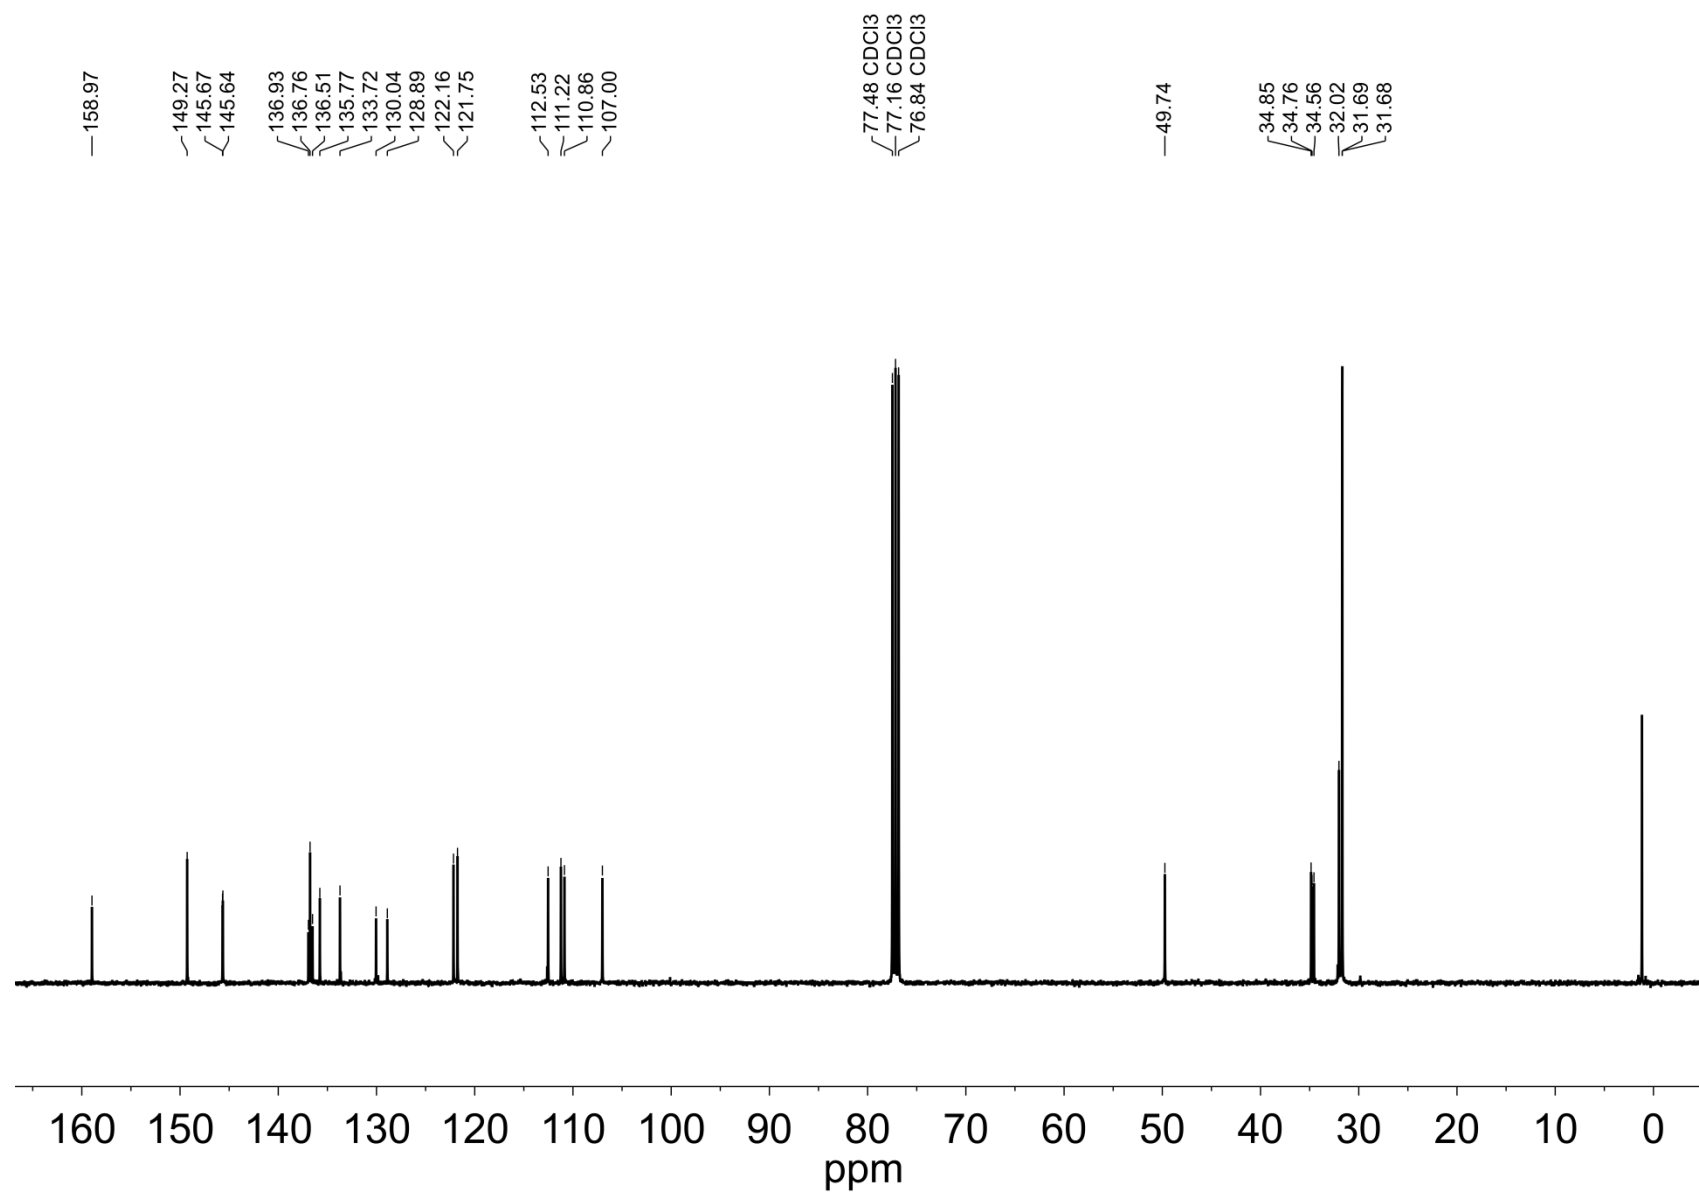

**Figure S9.**  $^1\text{H}$  NMR (400 MHz,  $\text{CDCl}_3$ ) spectrum of 2,7-di-*tert*-butyl-9,9-dimethyl-N,N-bis(pyridin-2-ylmethyl)-xanthene-4,5-diamine (**3b**).

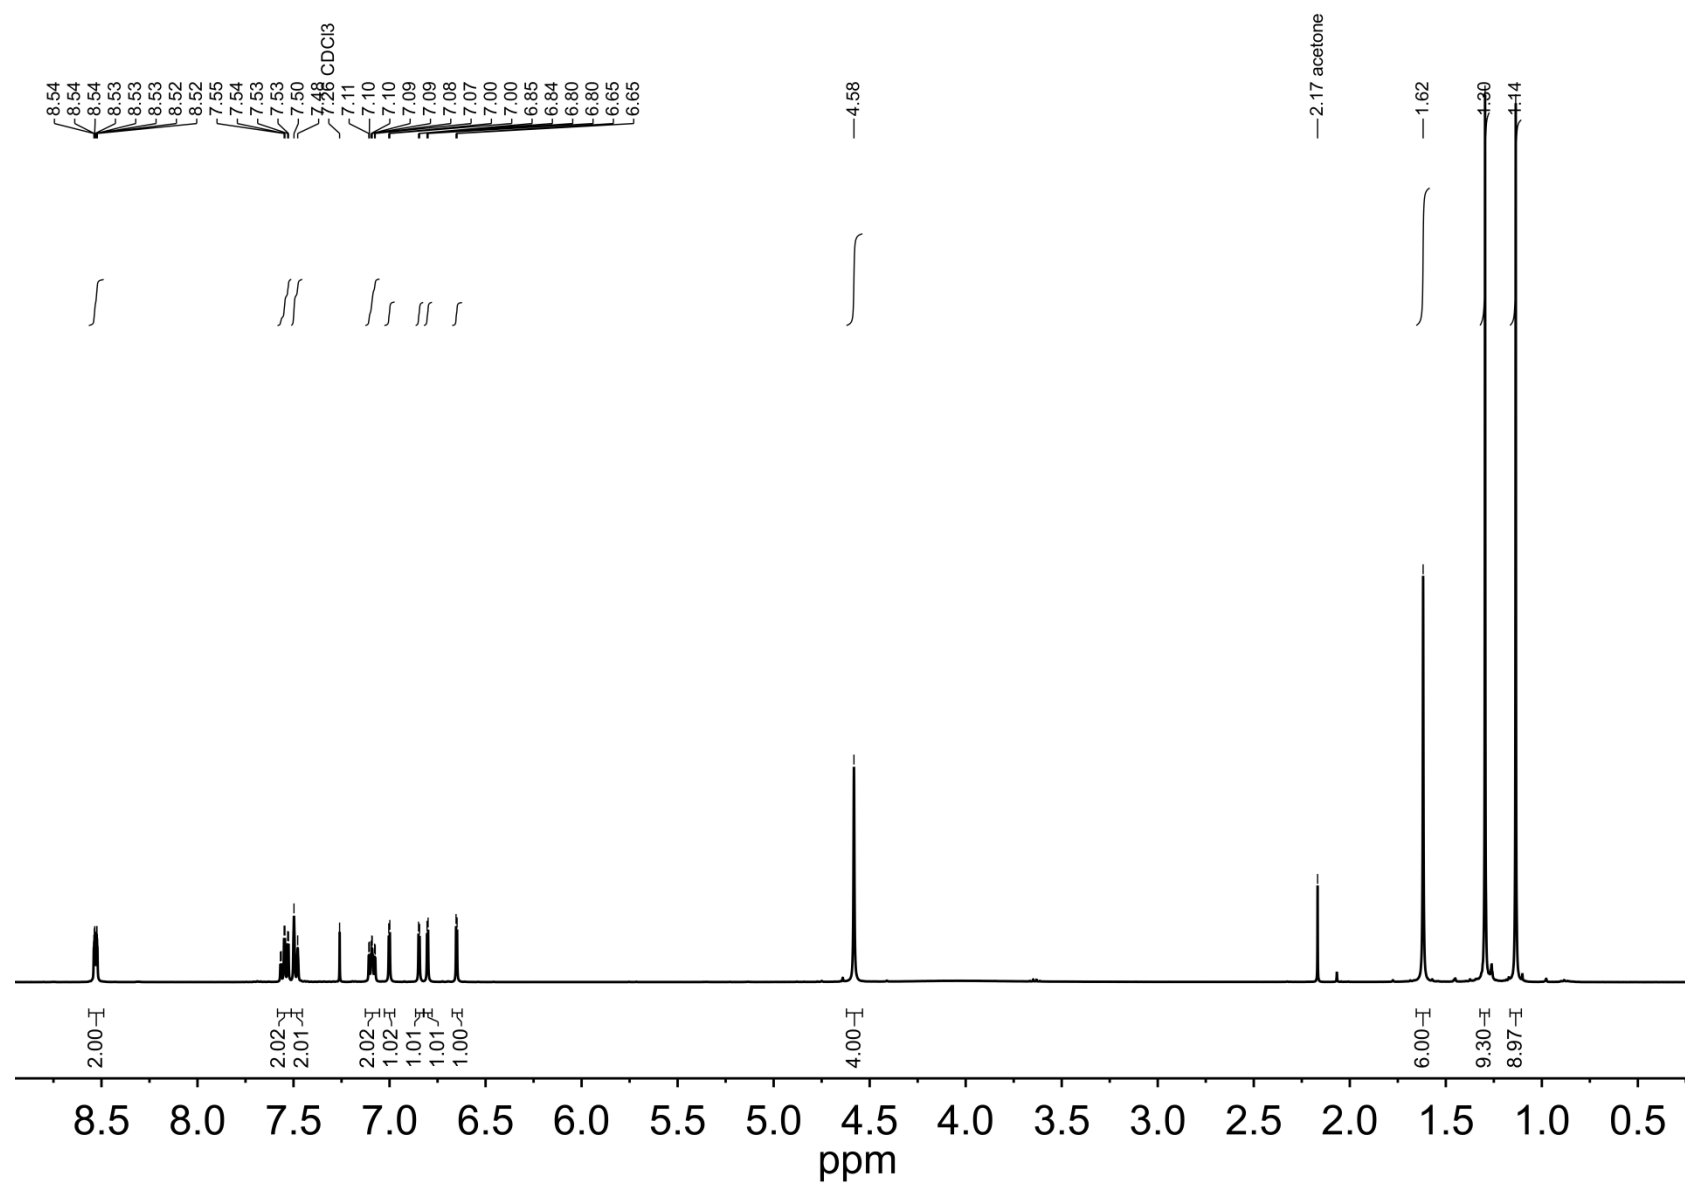

**Figure S10.**  $^{13}\text{C}$  NMR (100 MHz,  $\text{CDCl}_3$ ) spectrum of 2,7-di-*tert*-butyl-9,9-dimethyl-N,N-bis(pyridin-2-ylmethyl)-xanthene-4,5-diamine (**3b**).

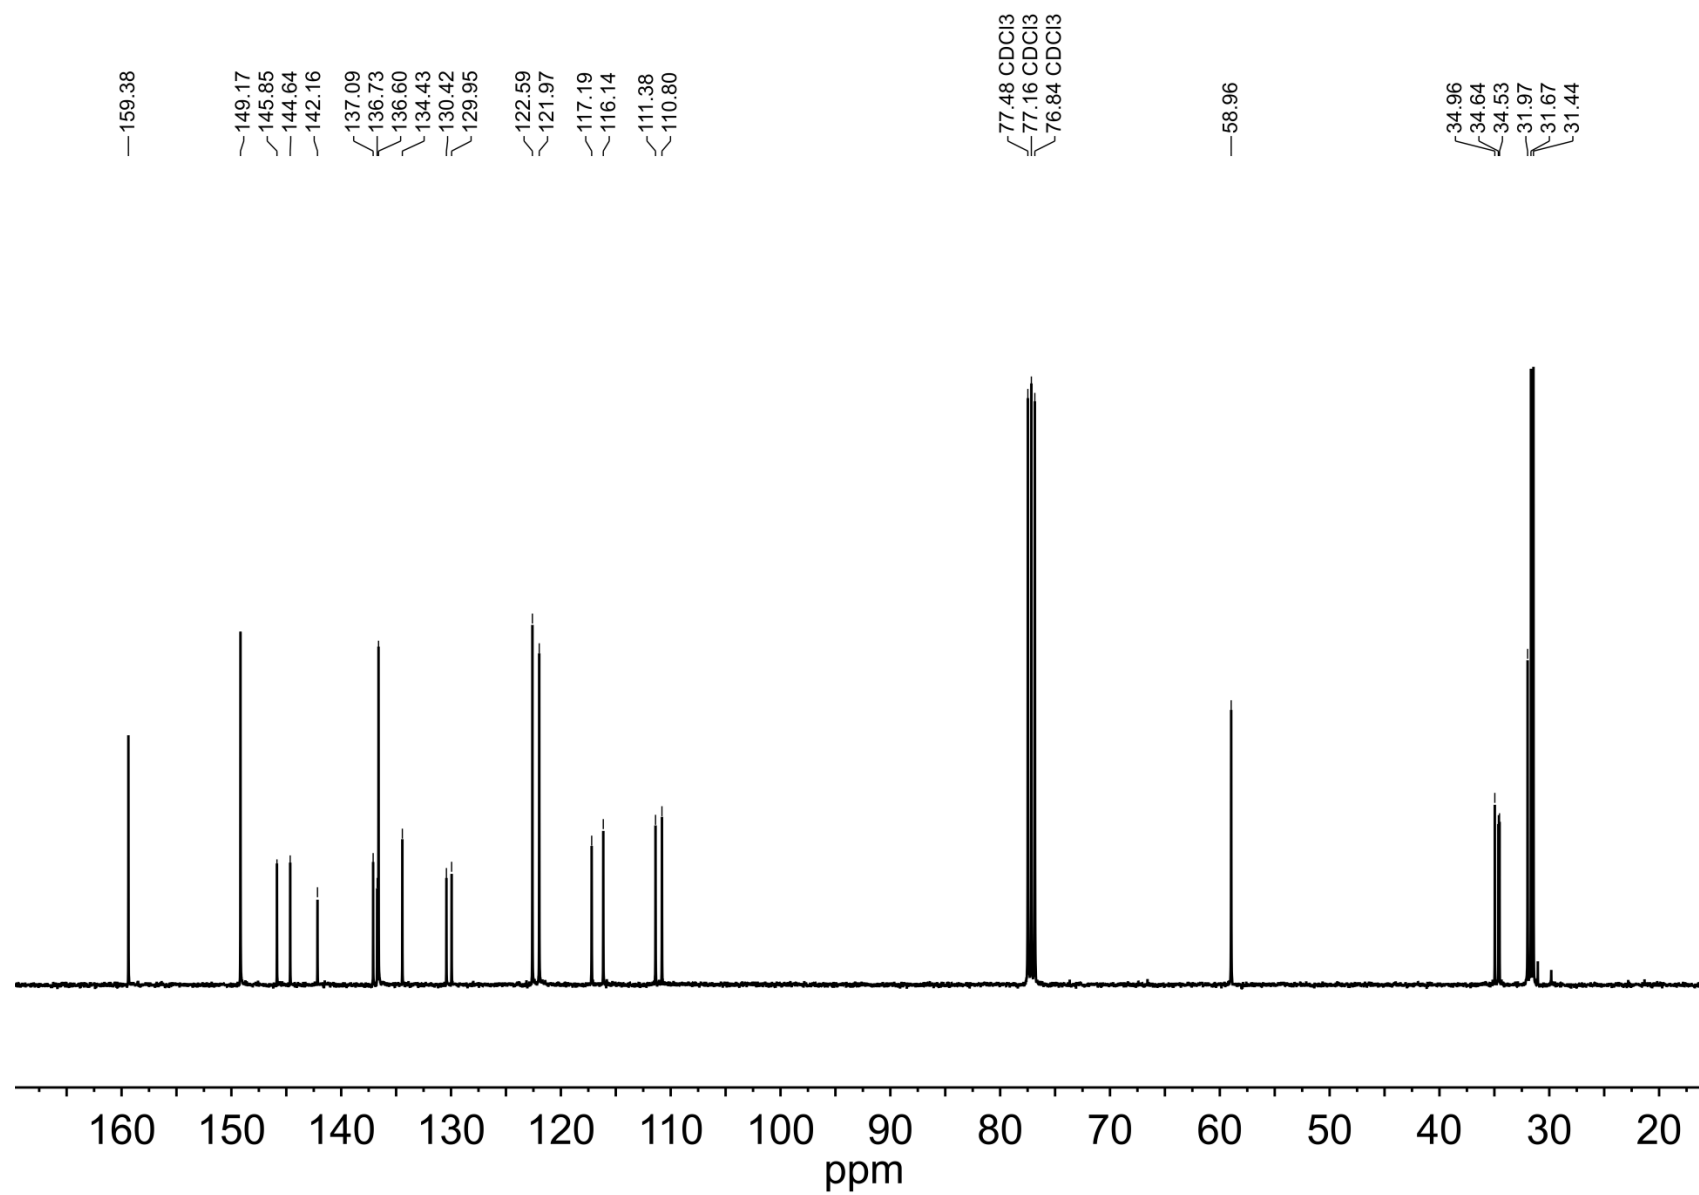

**Figure S11.**  $^1\text{H}$  NMR (600 MHz,  $\text{CDCl}_3$ ) spectrum of **iXa**.

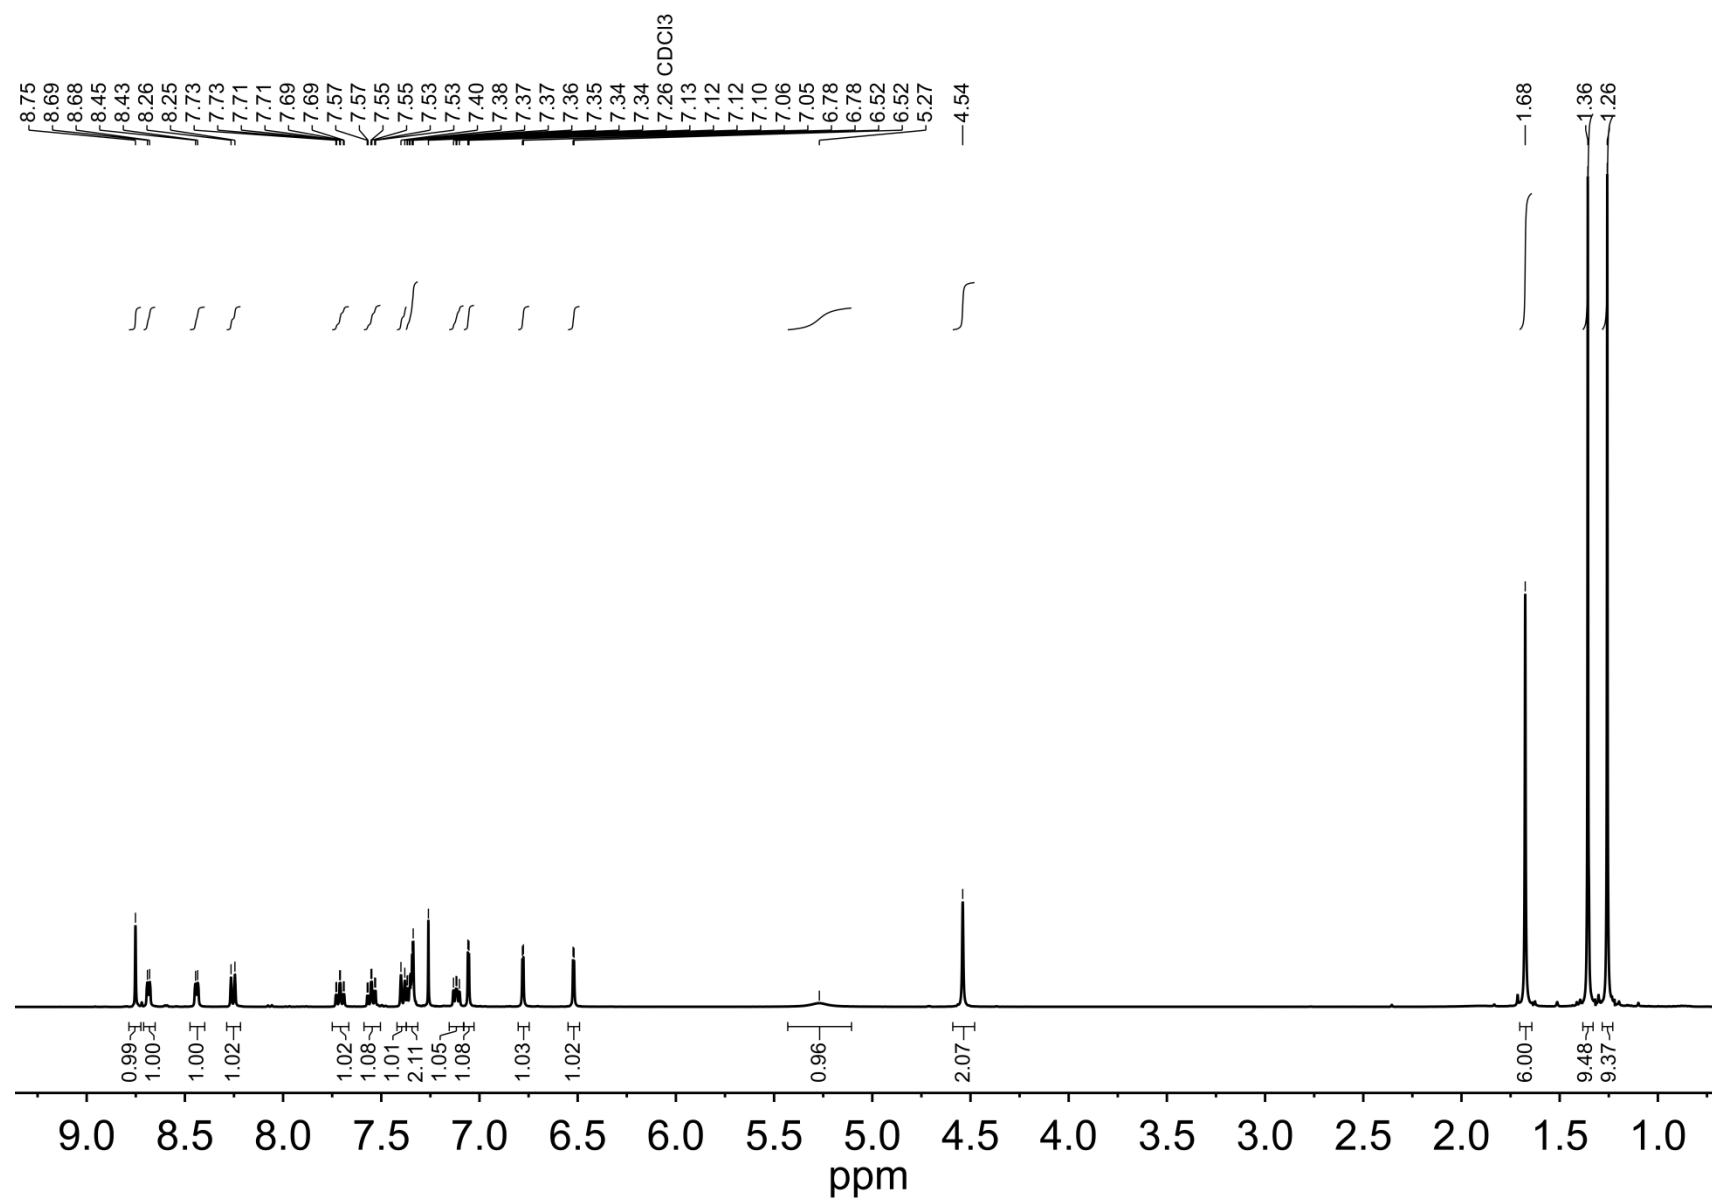

**Figure S12.**  $^{13}\text{C}$  NMR (151 MHz,  $\text{CDCl}_3$ ) spectrum of **iXa**.

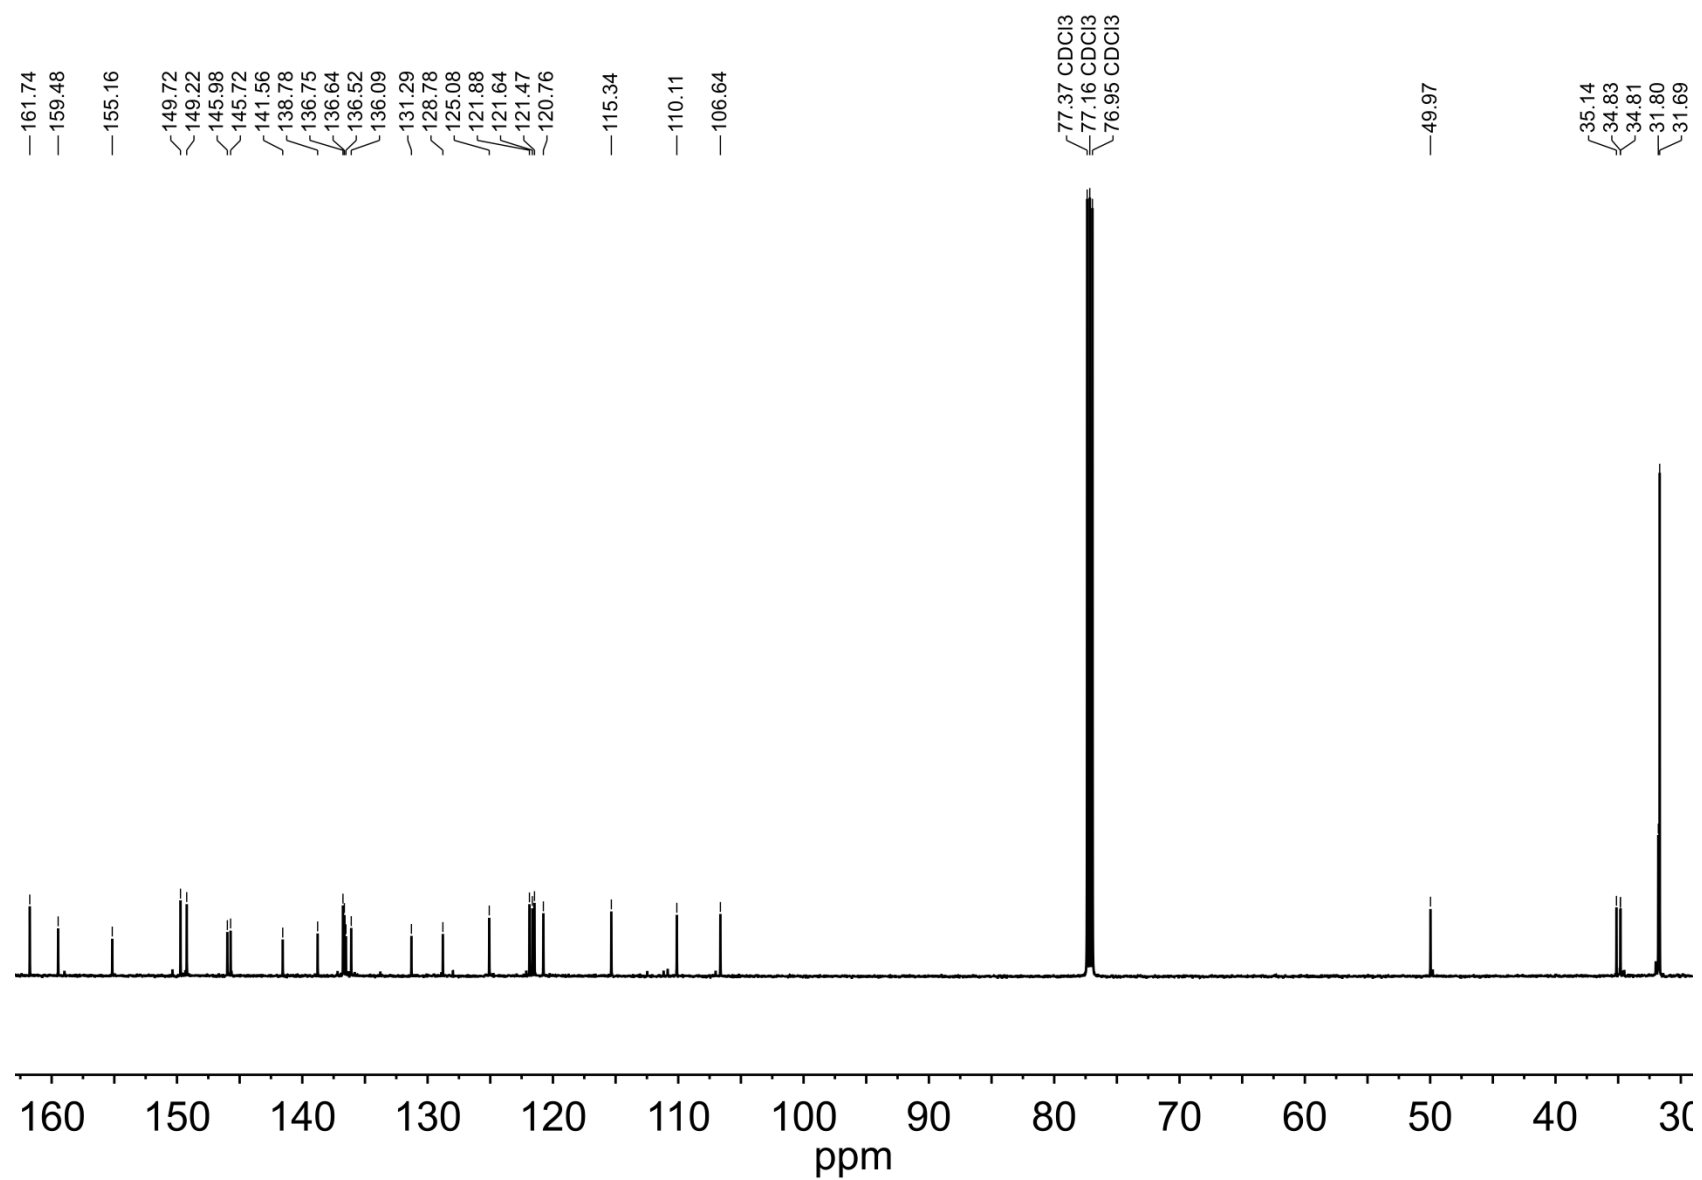

**Figure S13.**  $^1\text{H}$  cosy-NMR spectrum (600 MHz,  $\text{CDCl}_3$ ) spectrum of **iXa**.

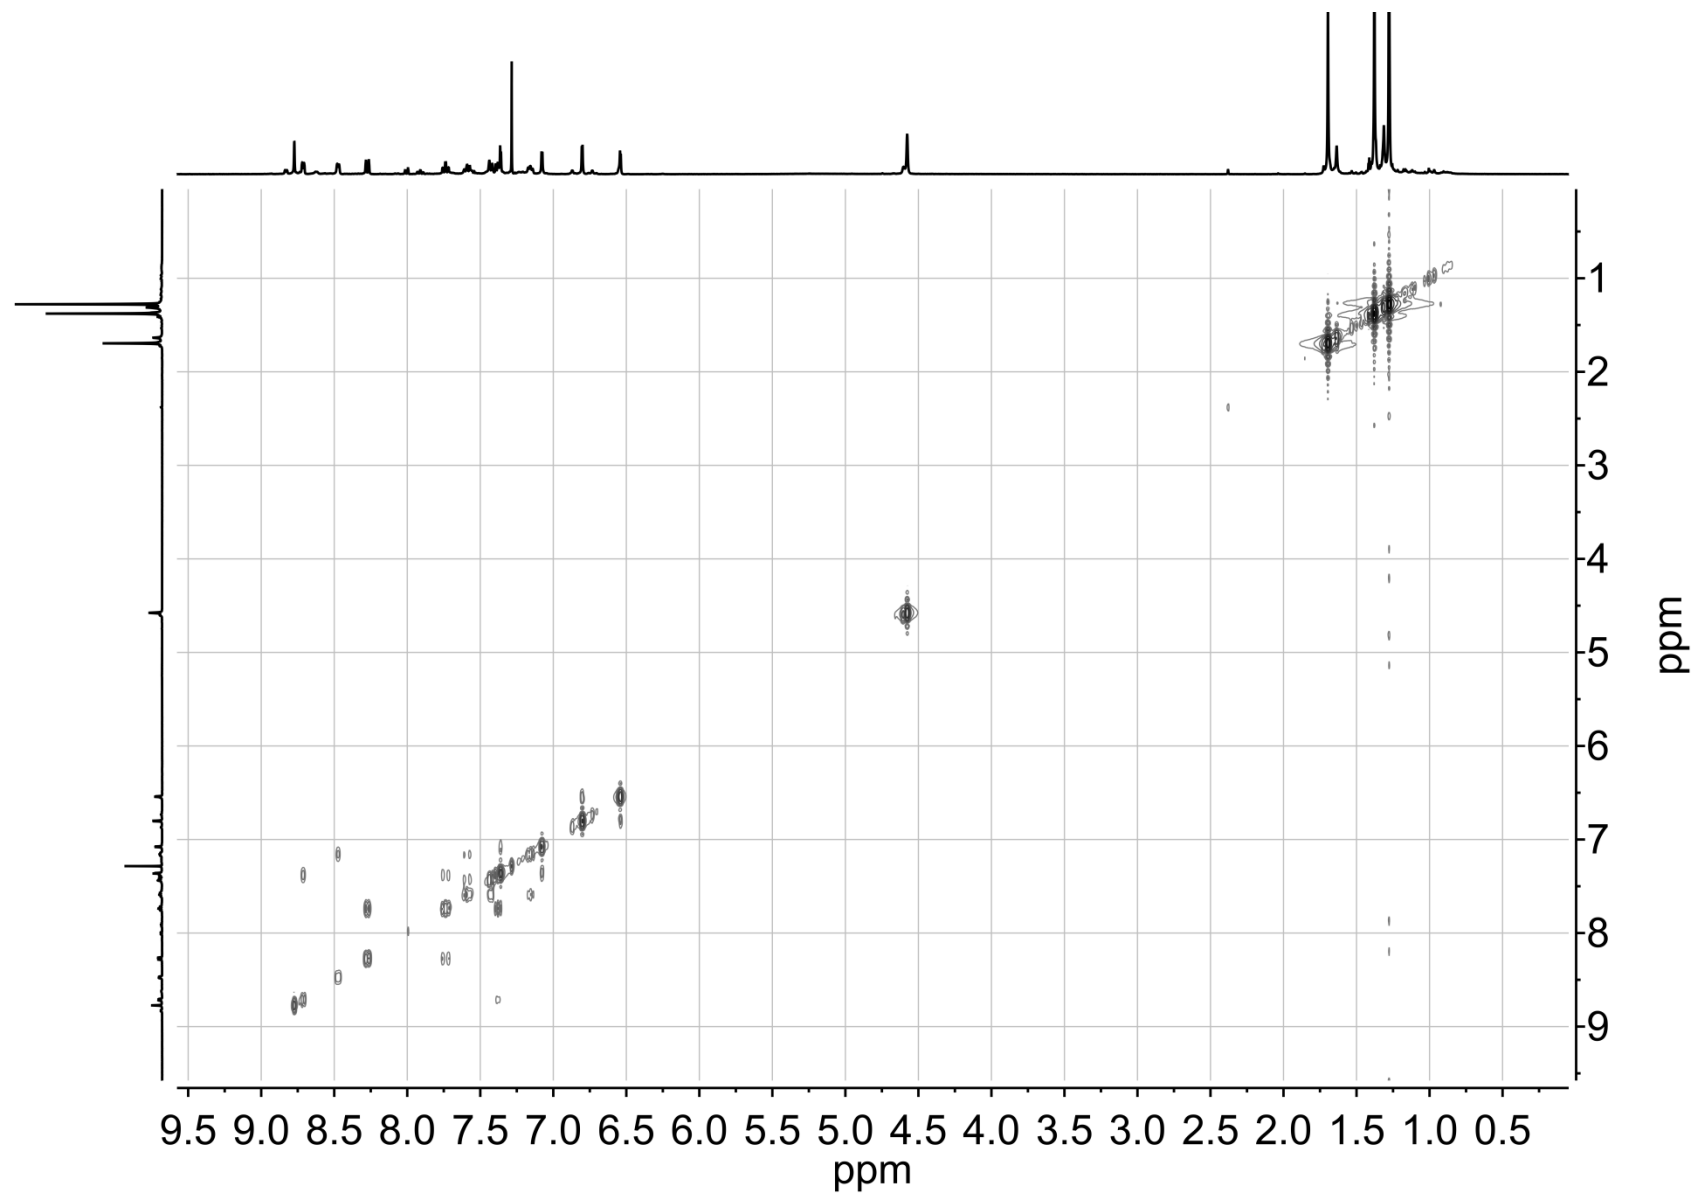

**Figure S14.**  $^1\text{H}$ ,  $^{13}\text{C}$  HSQC-NMR spectrum (600 MHz, 151 MHz,  $\text{CDCl}_3$ ) spectrum of **iXa**.

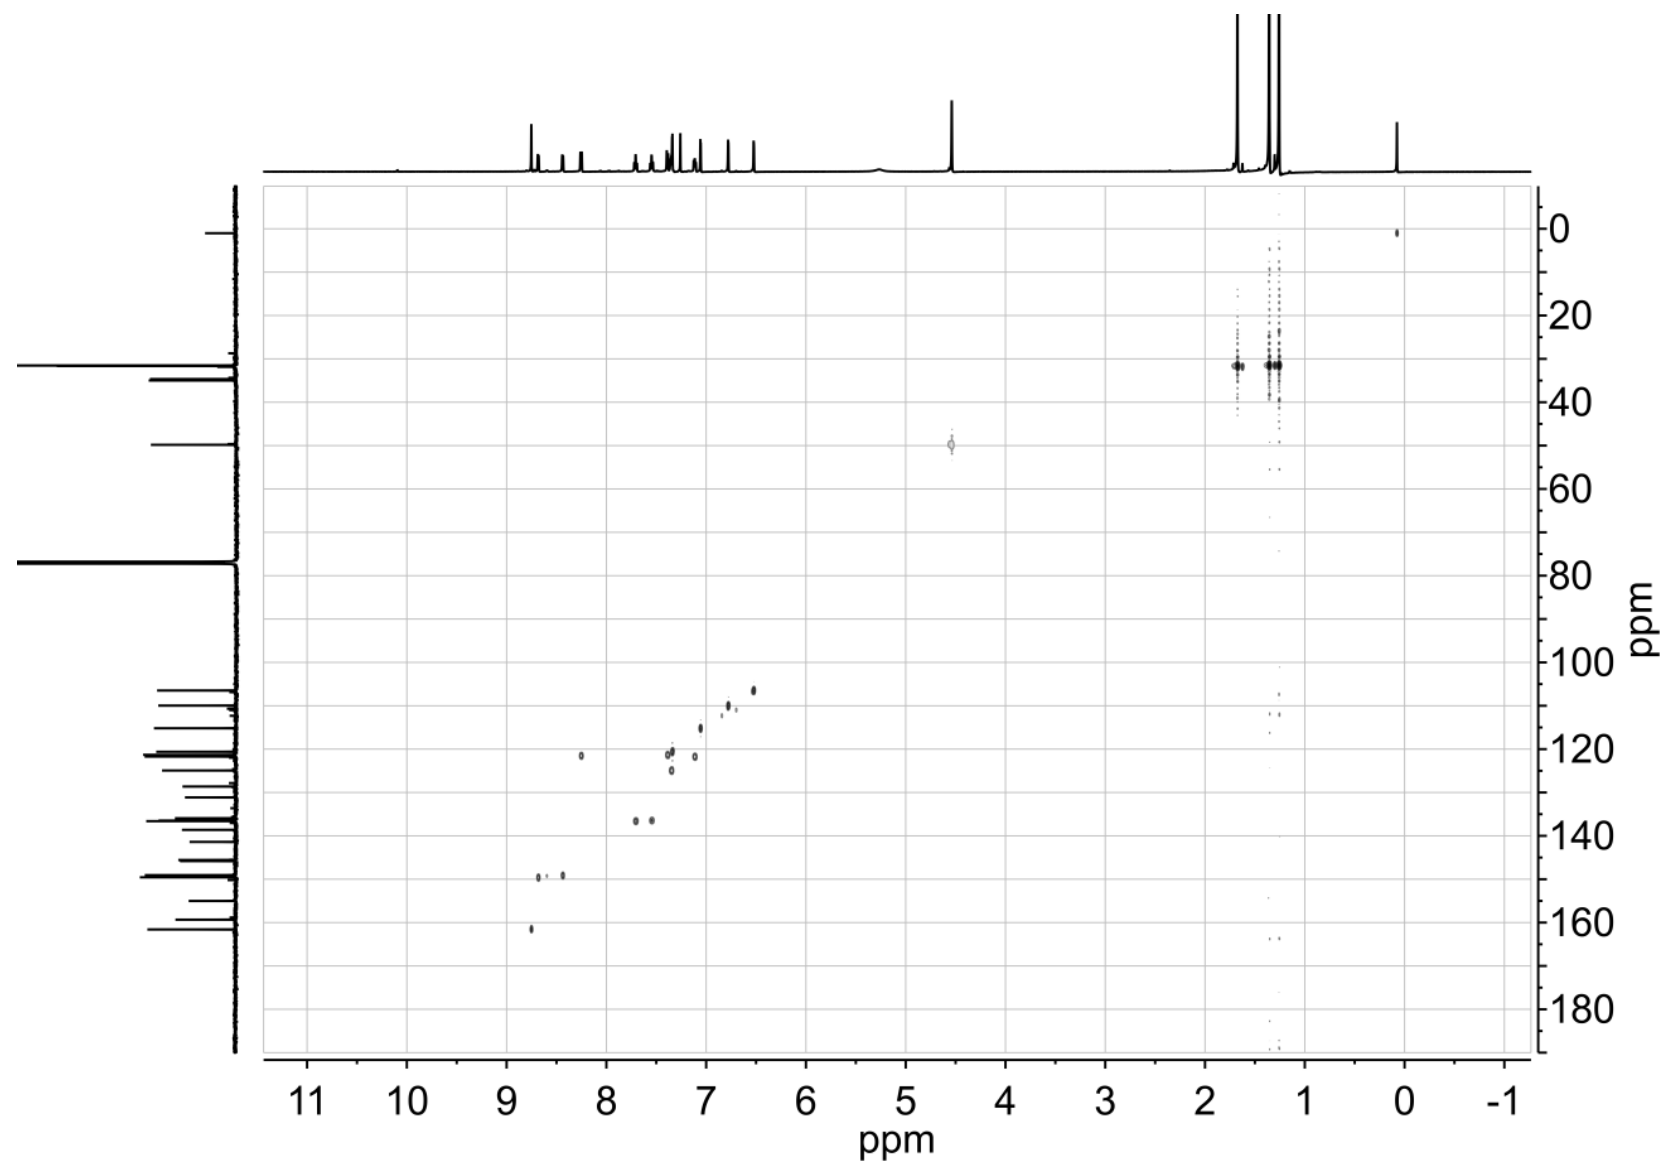

**Figure S15.**  $^1\text{H}$ ,  $^{13}\text{C}$  HMBC-NMR spectrum (600 MHz, 151 MHz,  $\text{CDCl}_3$ ) spectrum of **iXa**.

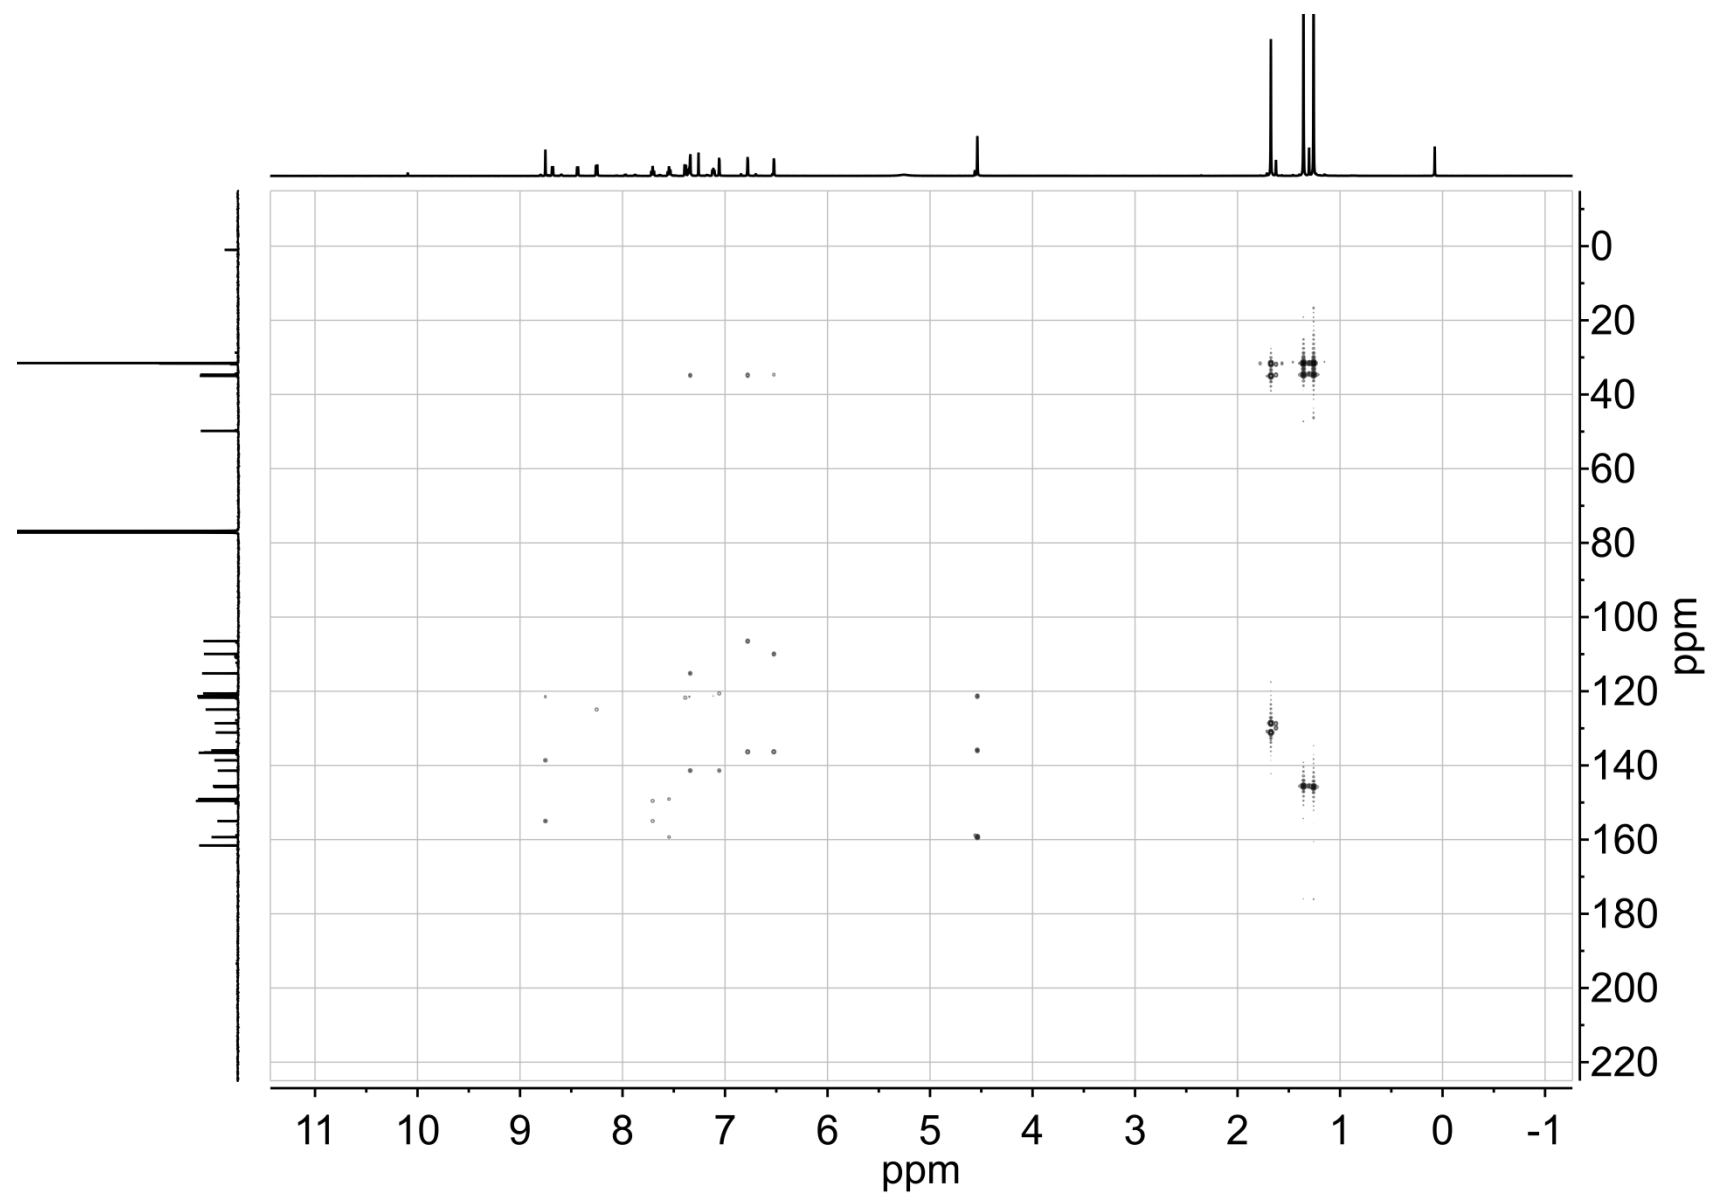



**Figure S16.**  $^1\text{H}$  NMR (600 MHz,  $\text{CDCl}_3$ ) spectrum of **iXa-2**.

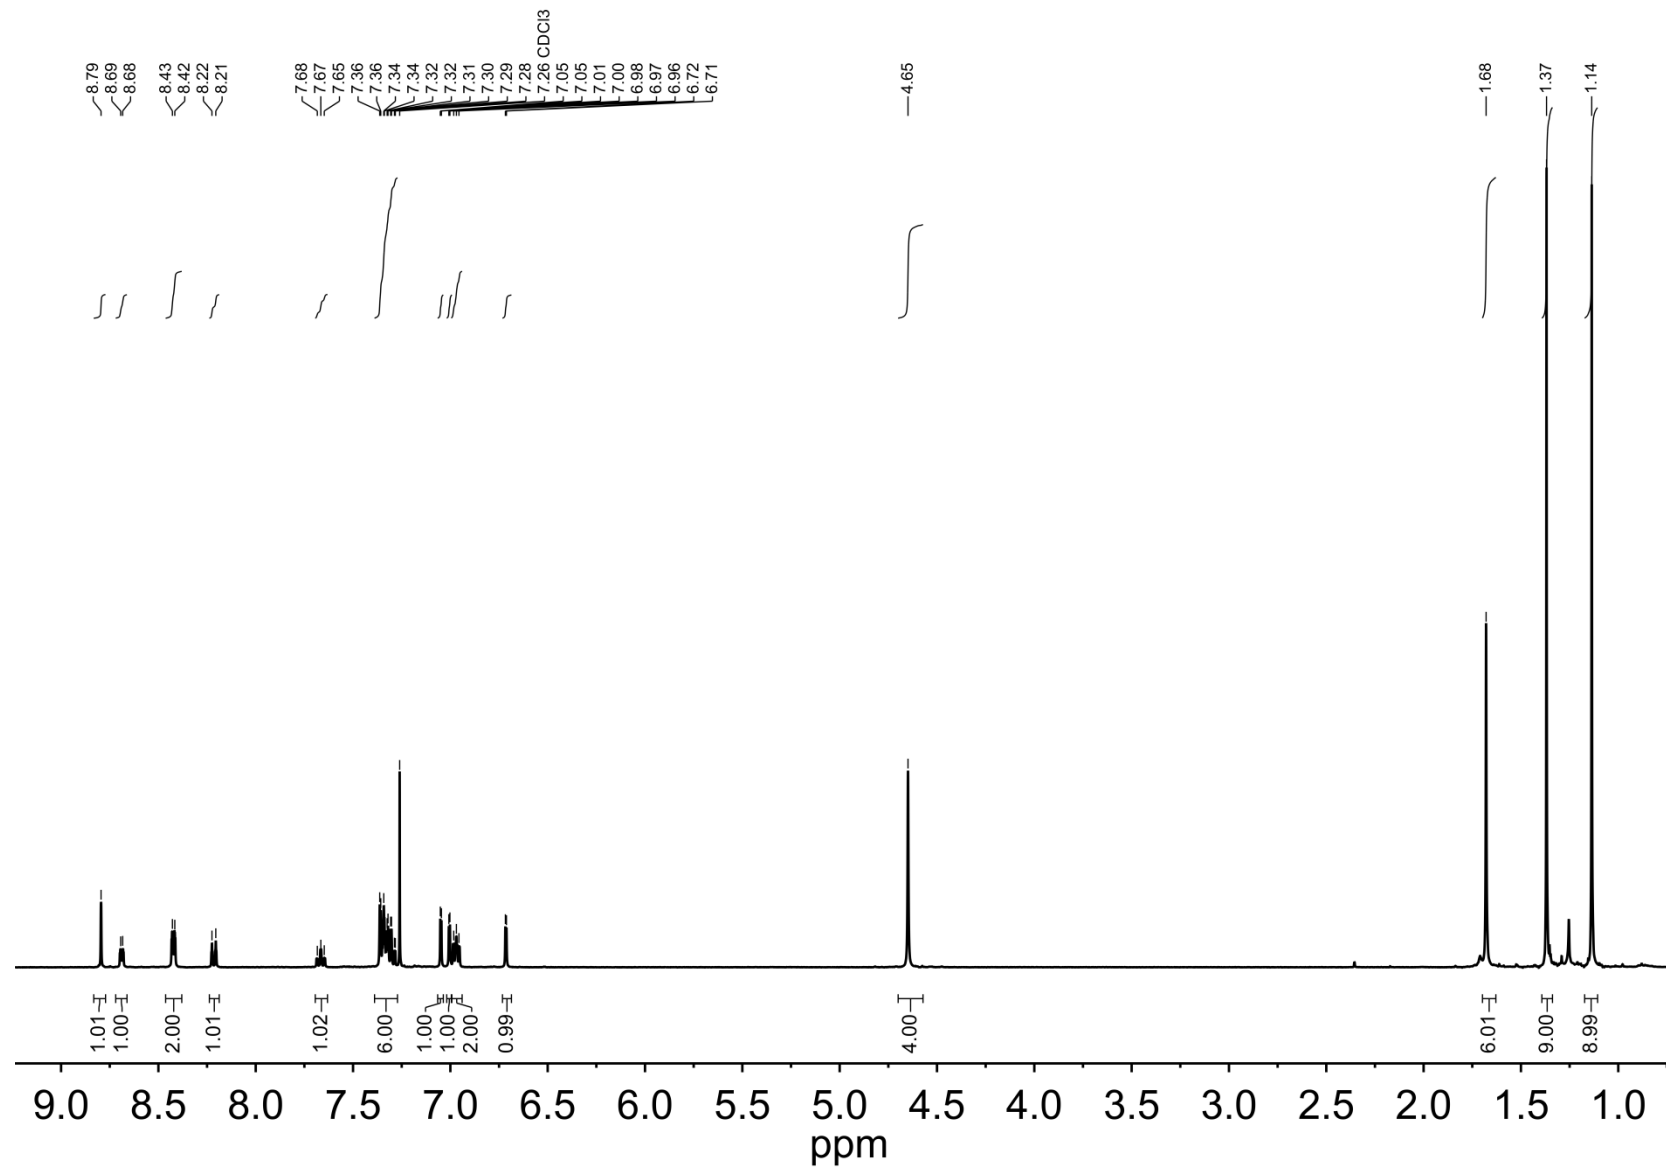

**Figure S17.**  $^{13}\text{C}$  NMR (151 MHz,  $\text{CDCl}_3$ ) spectrum of **iXa-2**.

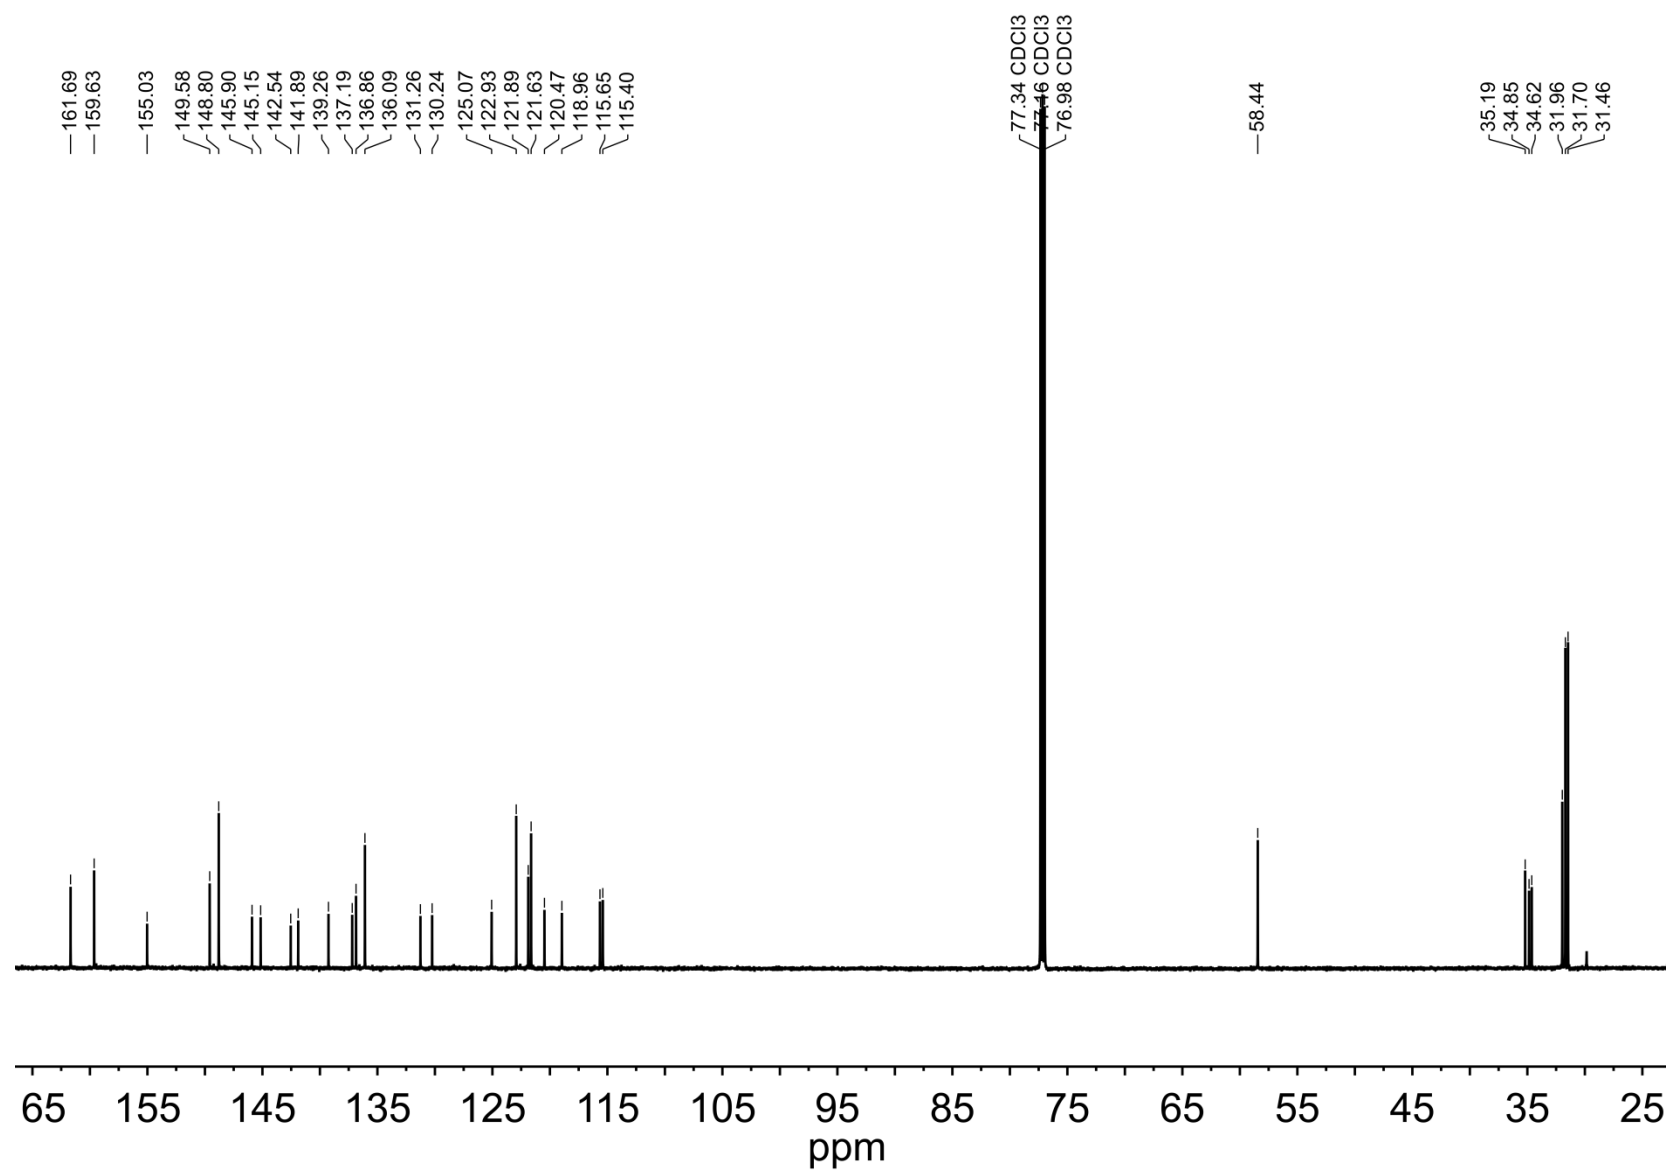

**Figure S18.**  $^1\text{H}$  cosy-NMR spectrum (600 MHz,  $\text{CDCl}_3$ ) spectrum of **iXa-2**.

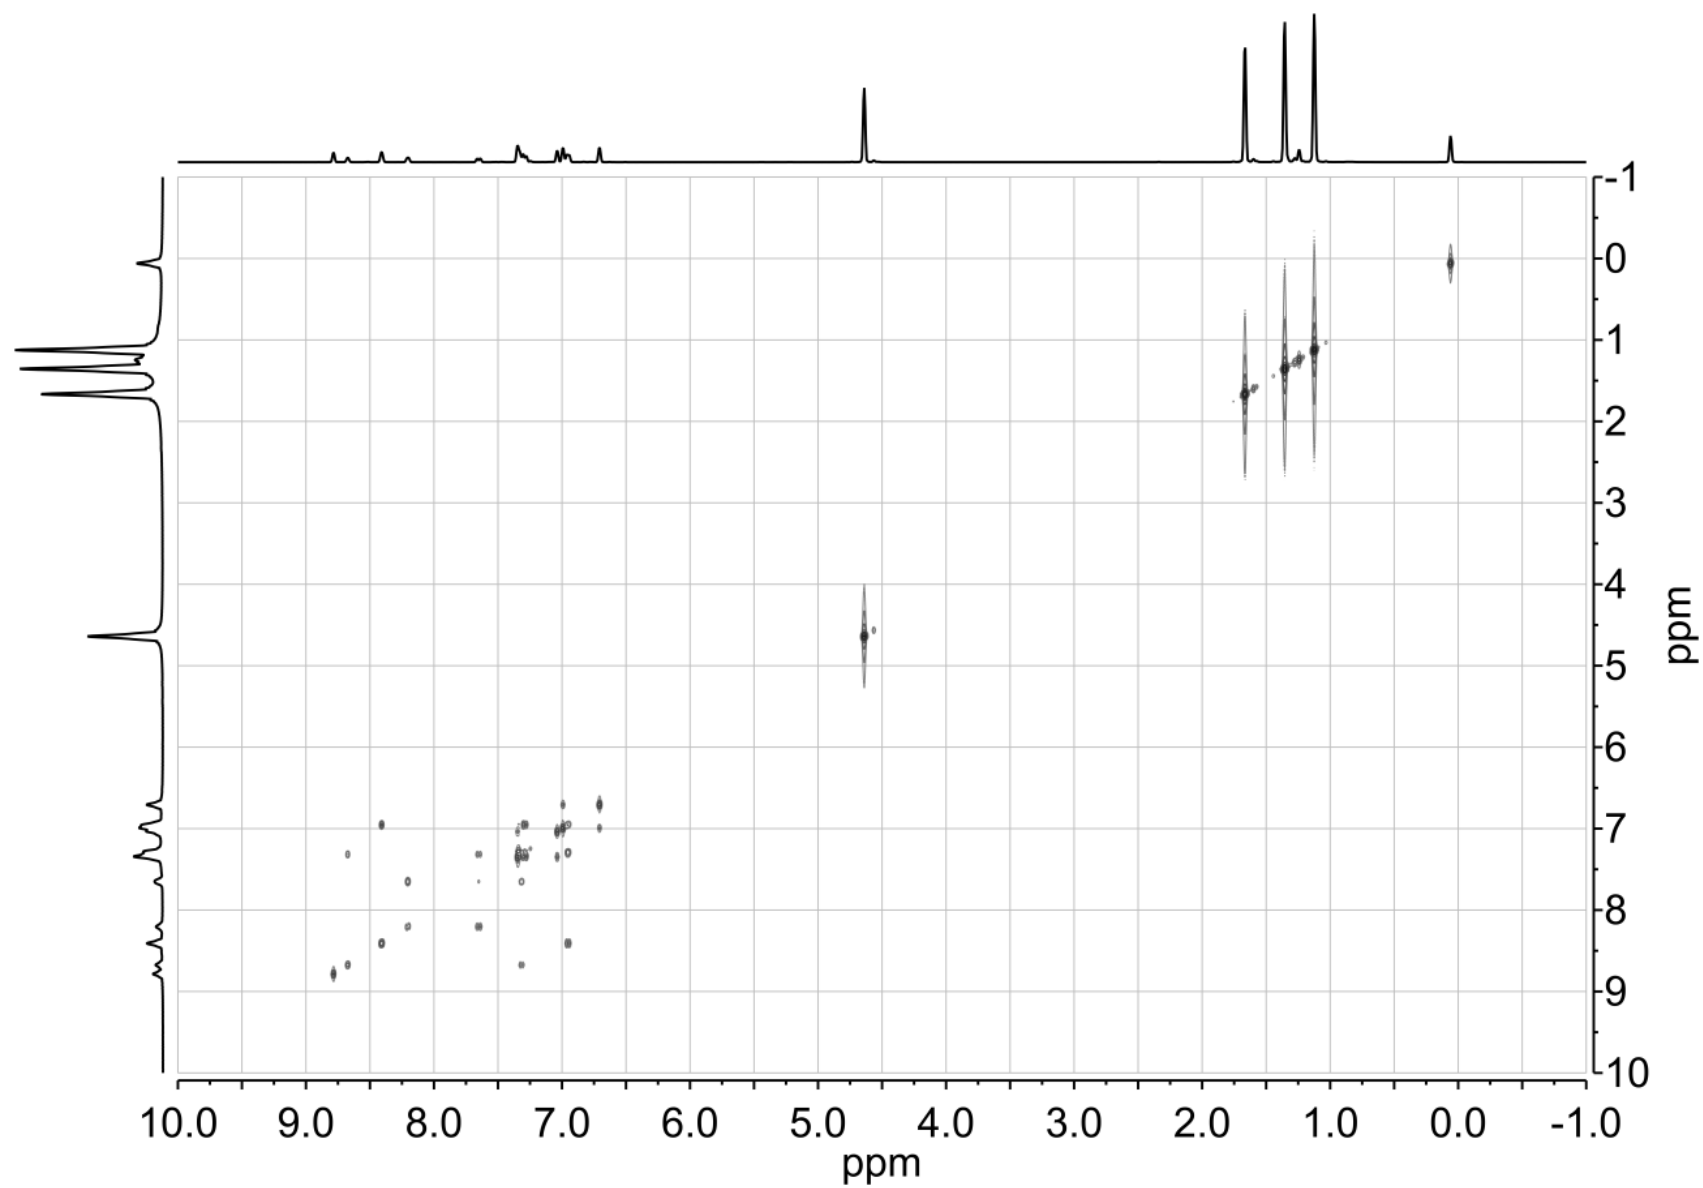

**Figure S19.**  $^1\text{H}$ ,  $^{13}\text{C}$  HSQC-NMR spectrum (600 MHz, 151 MHz,  $\text{CDCl}_3$ ) spectrum of **iXa-2**.

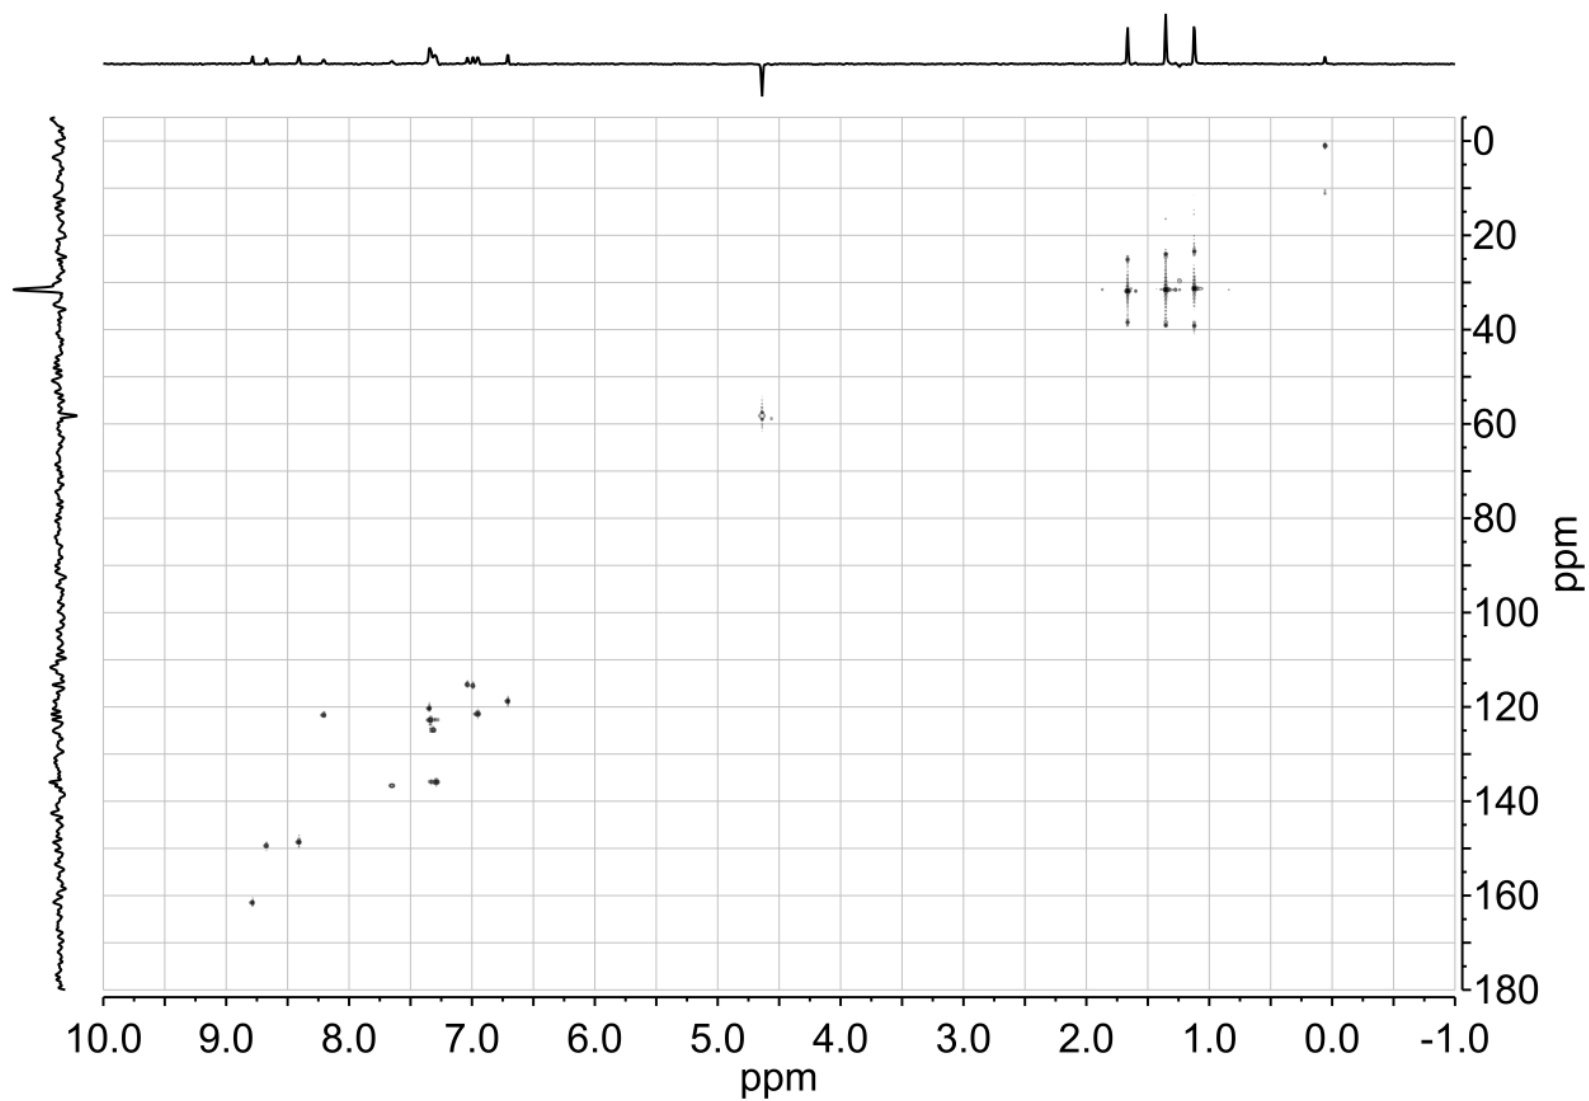

**Figure S20.**  $^1\text{H}$ ,  $^{13}\text{C}$  HMBC-NMR spectrum (600 MHz, 151 MHz,  $\text{CDCl}_3$ ) spectrum of **iXa-2**.

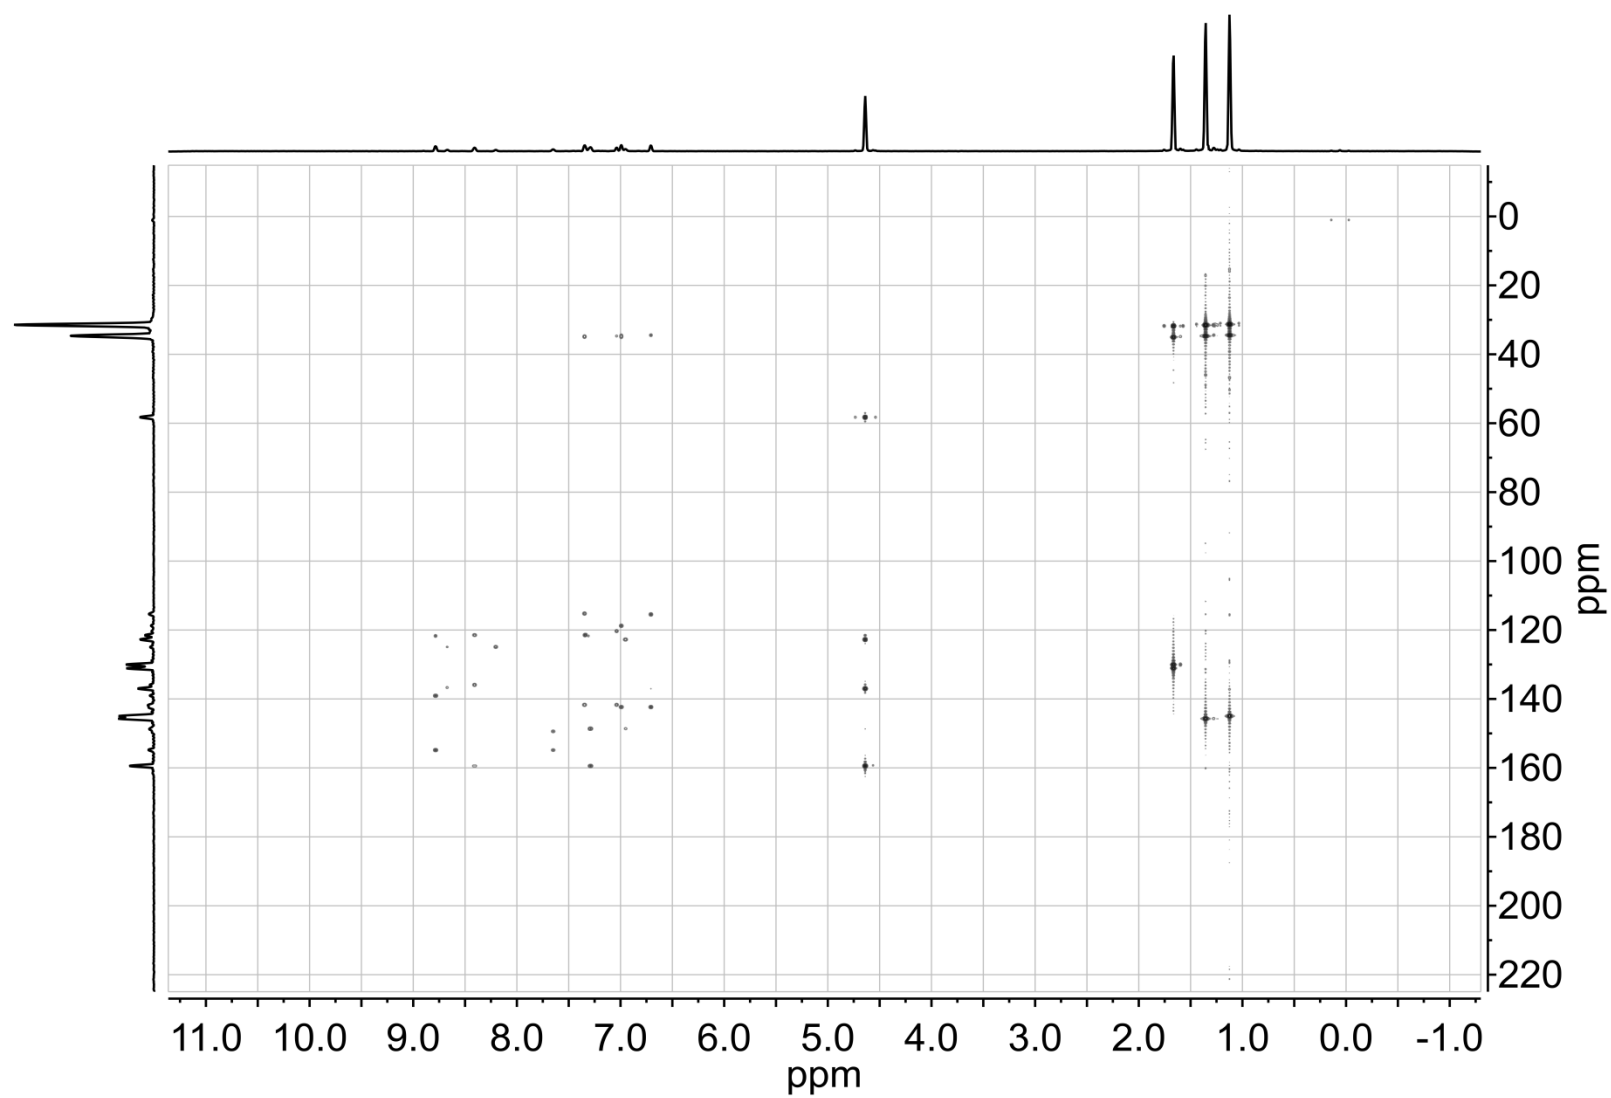

**Figure S21.**  $^1\text{H}$  NMR (500 MHz,  $\text{C}_2\text{D}_2\text{Cl}_4$ ) spectrum of  $[\text{Zn}(\text{iXa})(\text{OTf})_2]$  (**6**).

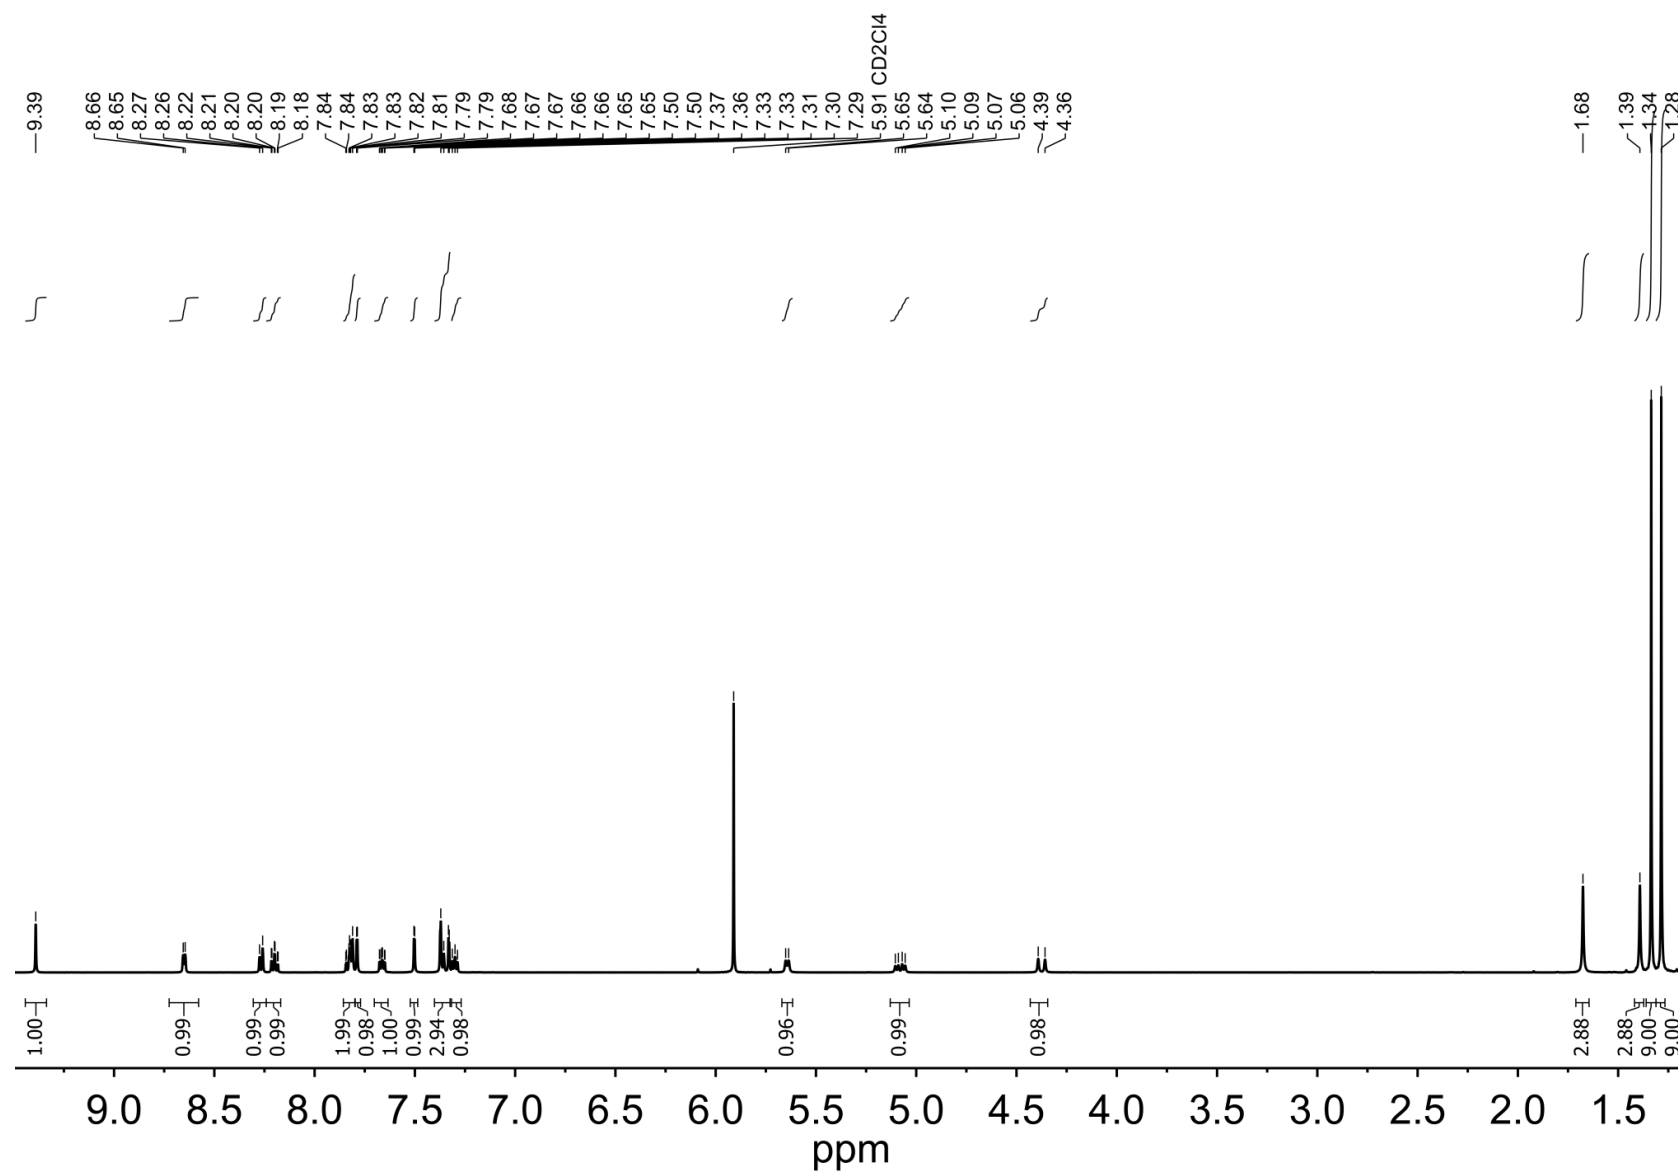

**Figure S22.**  $^{13}\text{C}$  NMR (126 MHz,  $\text{C}_2\text{D}_2\text{Cl}_4$ ) spectrum of  $[\text{Zn}(\text{iXa})(\text{OTf})_2]$  (**6**).

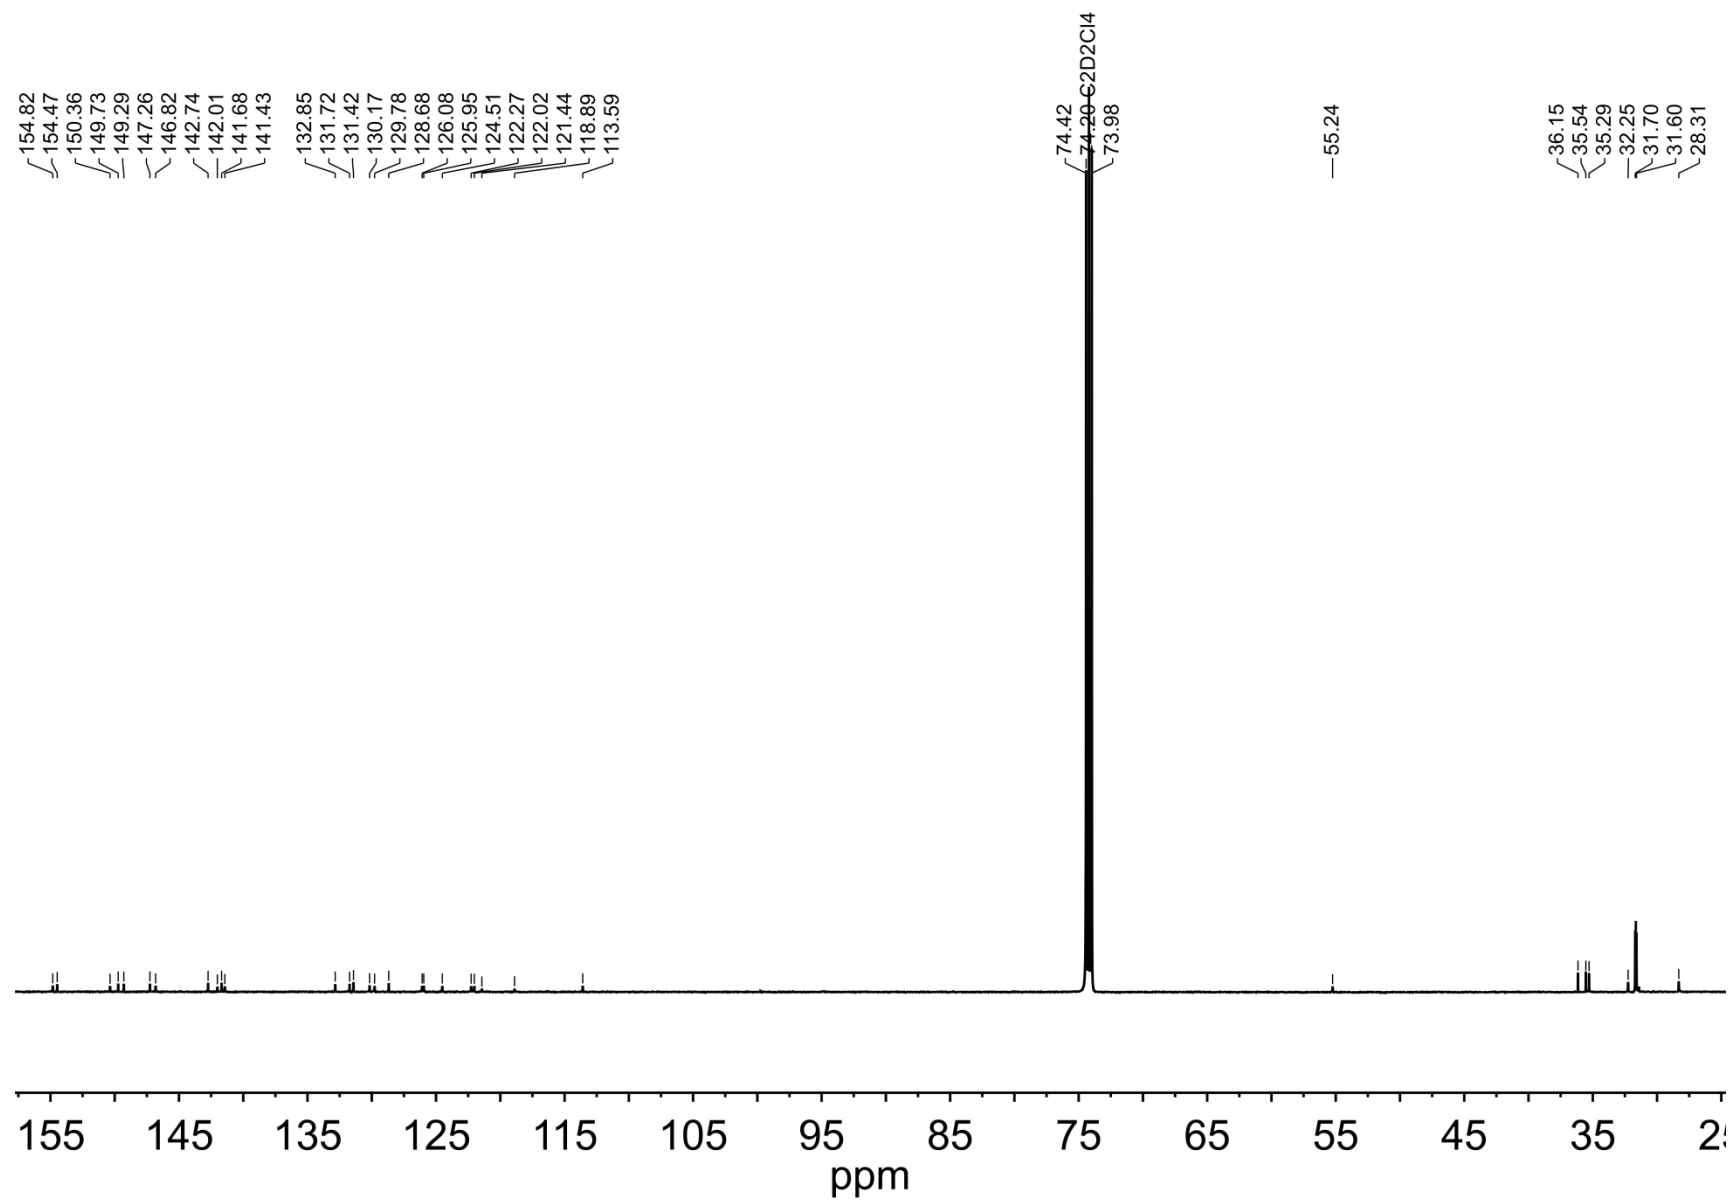

**Figure S23.**  $^1\text{H}$  cosy-NMR spectrum (500 MHz,  $\text{C}_2\text{D}_2\text{Cl}_4$ ) spectrum of  $[\text{Zn}(\text{iXa})(\text{OTf})_2]$  (**6**).

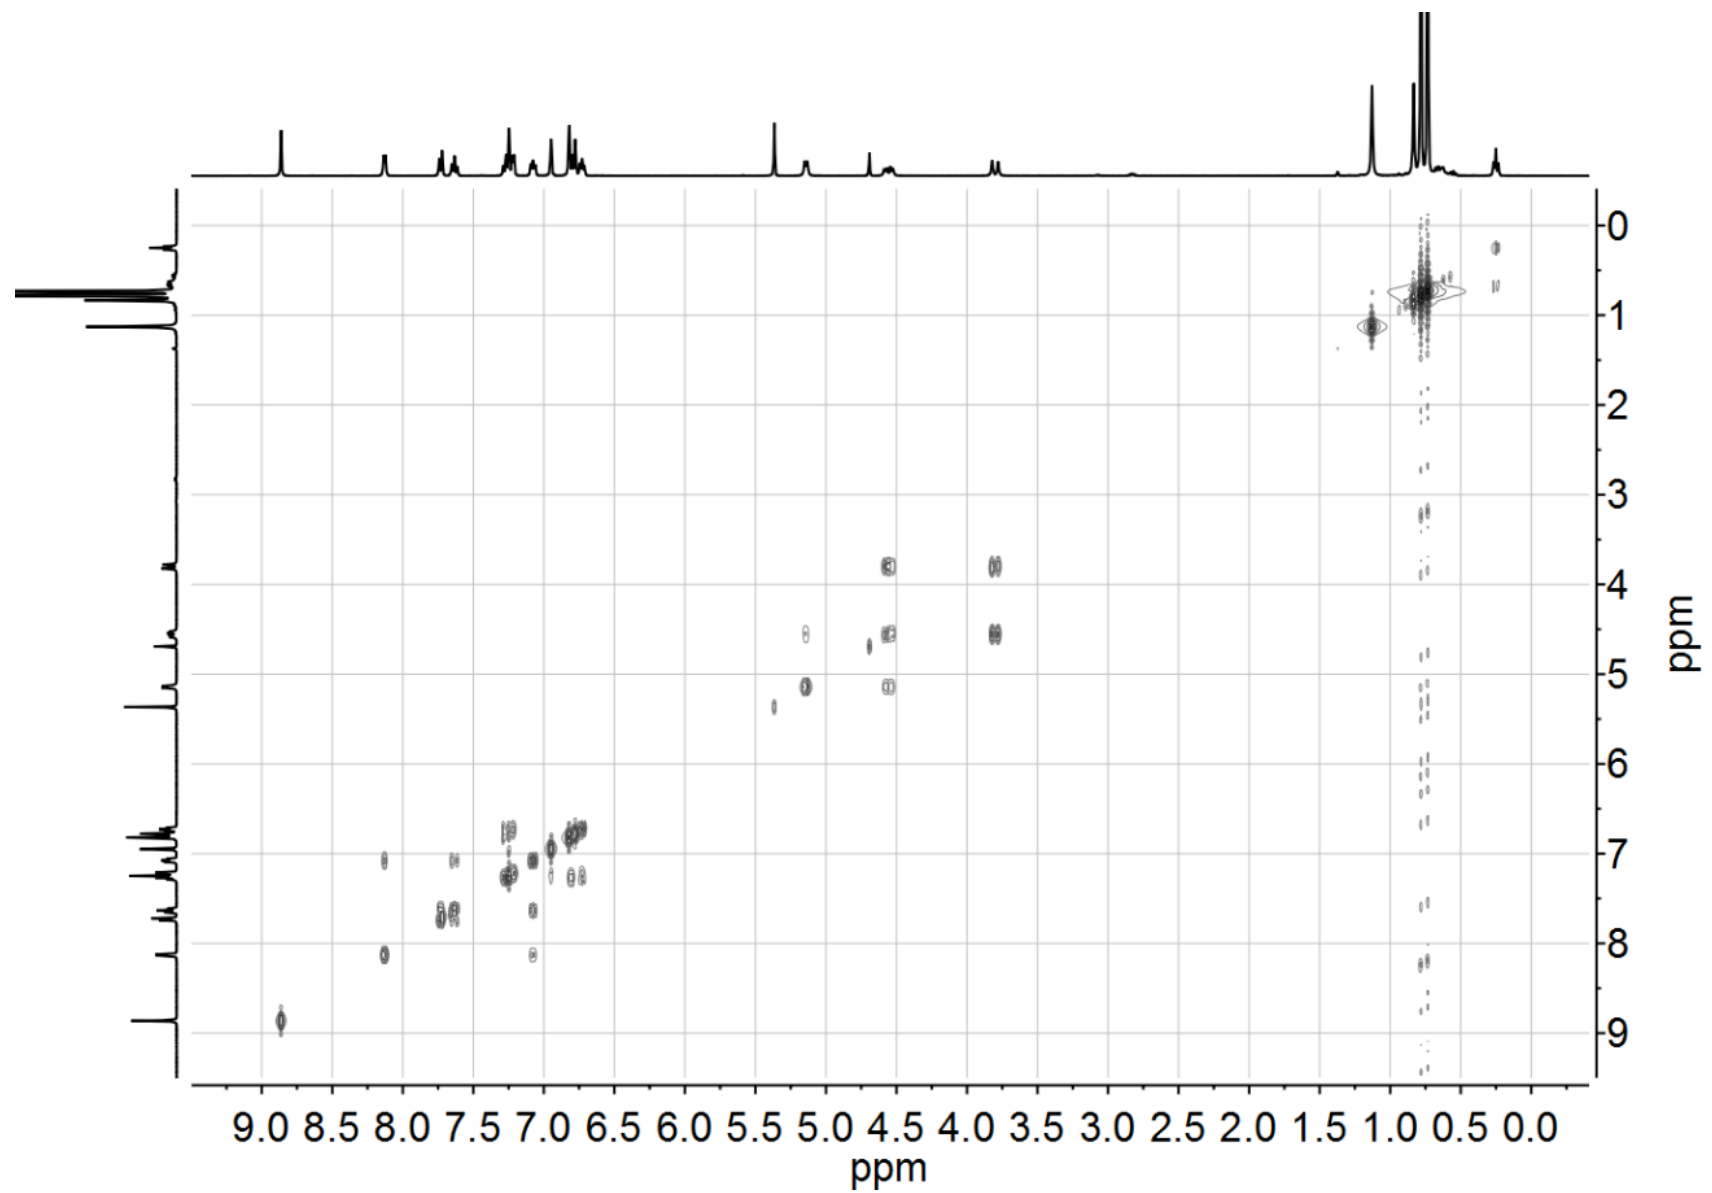



**Figure S24.**  $^1\text{H}$ ,  $^{13}\text{C}$  HSQC-NMR spectrum (500 MHz, 126 MHz,  $\text{C}_2\text{D}_2\text{Cl}_4$ ) spectrum of  $[\text{Zn}(\text{iXa})(\text{OTf})_2]$  (**6**).

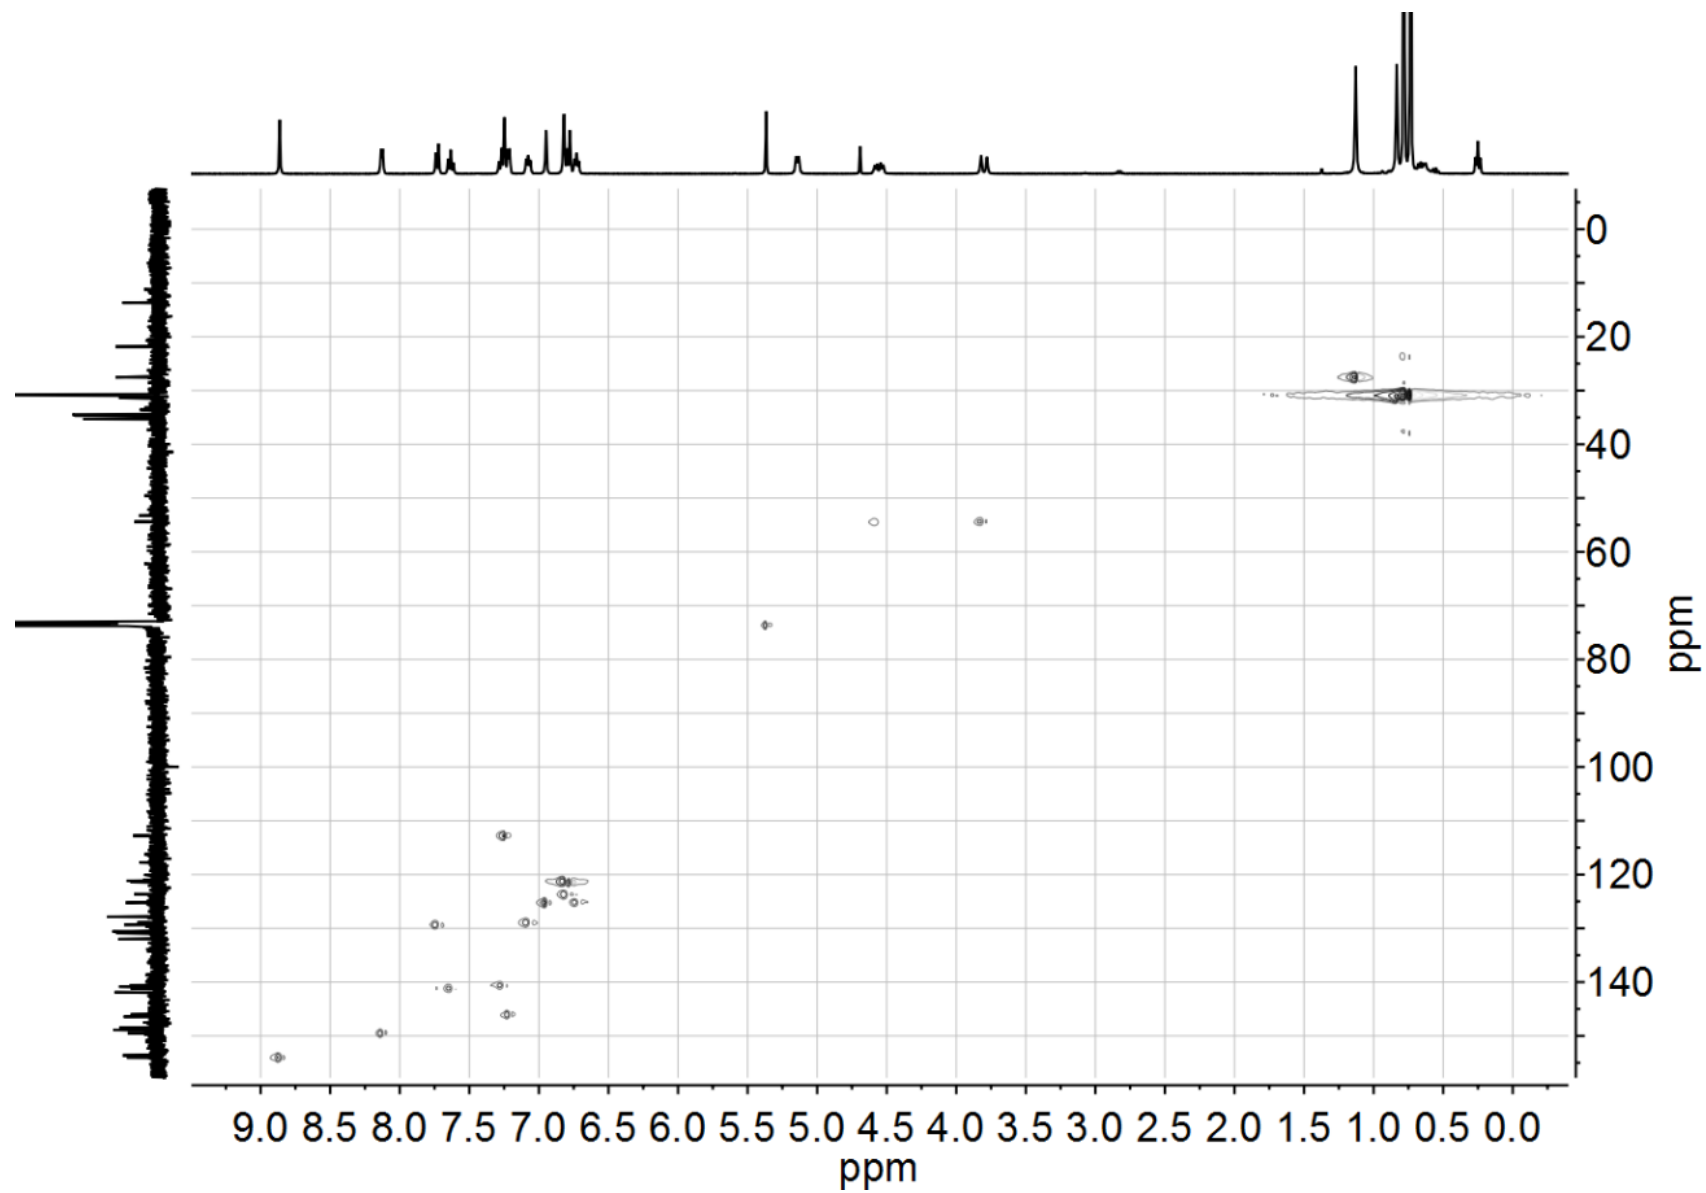

**Figure S25.**  $^1\text{H}$ ,  $^{13}\text{C}$  HMBC-NMR spectrum (500 MHz, 126 MHz,  $\text{C}_2\text{D}_2\text{Cl}_4$ ) spectrum of  $[\text{Zn}(\text{iXa})(\text{OTf})_2]$  (**6**).

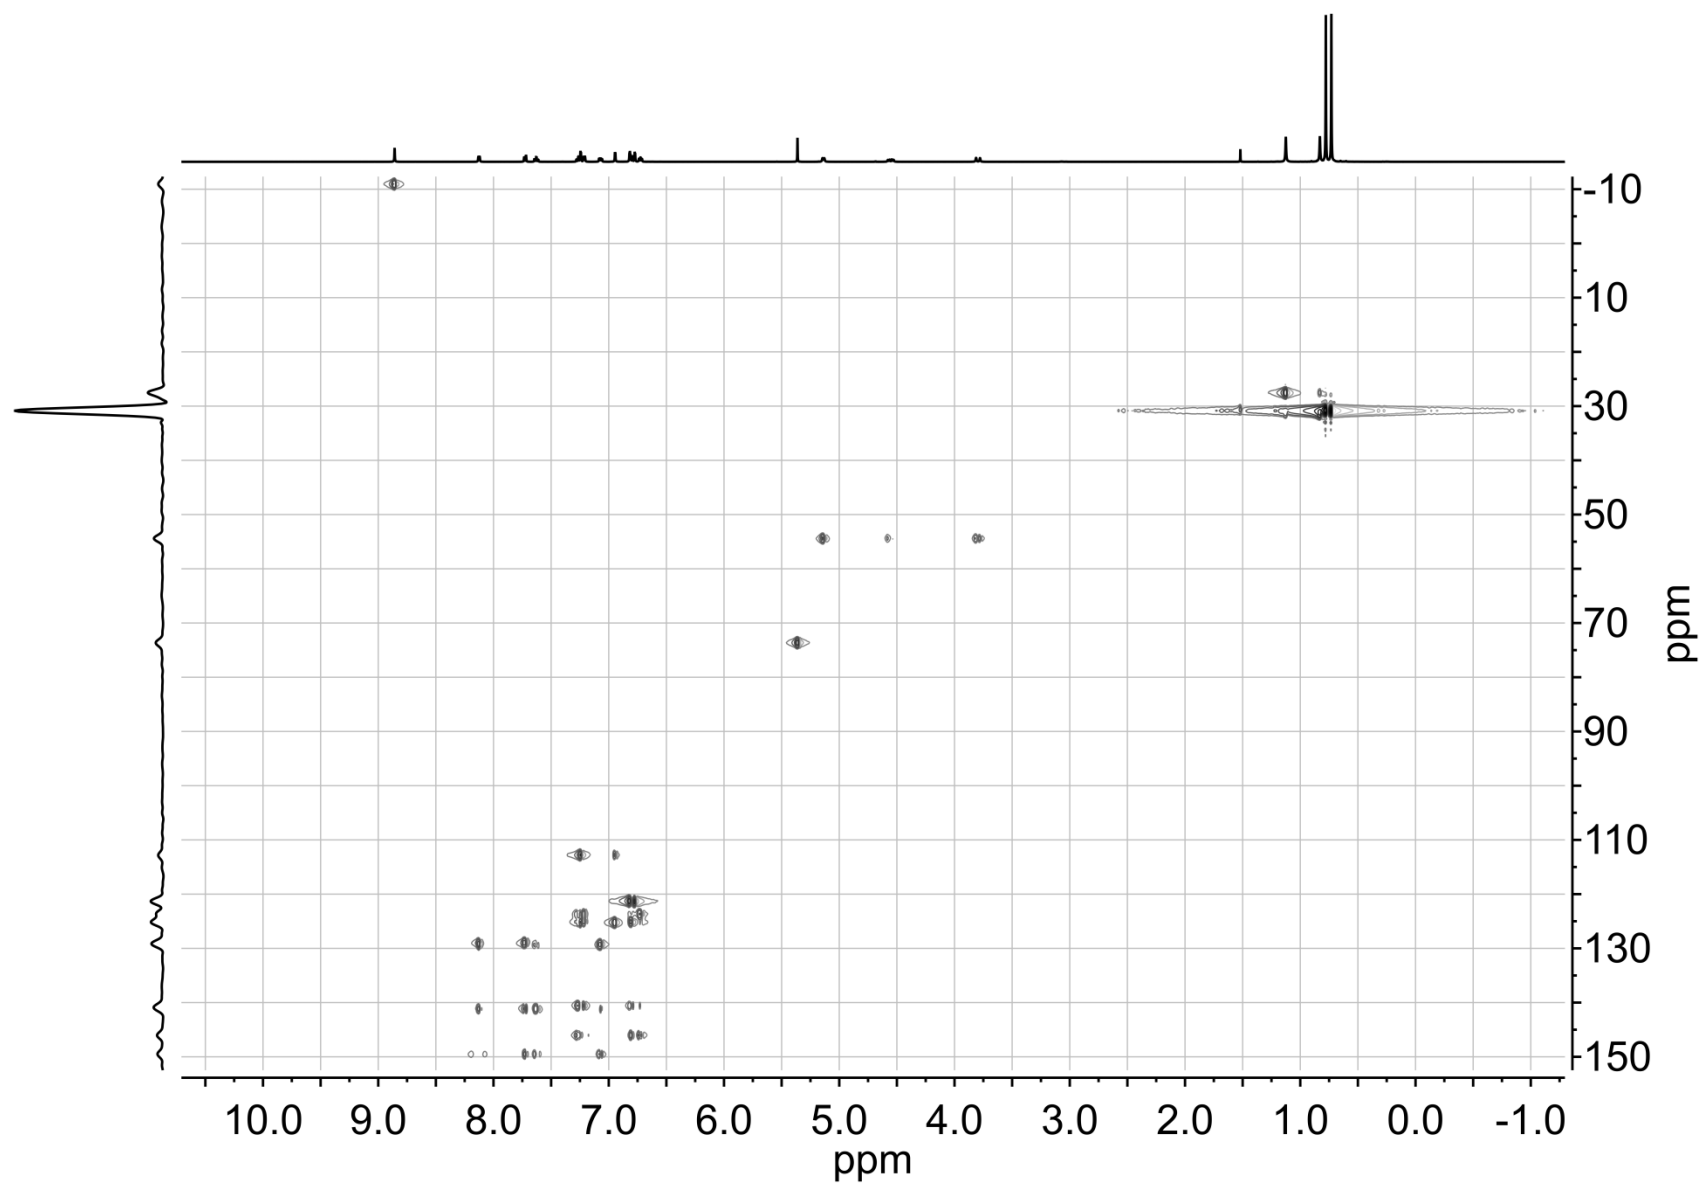

**Figure S26.**  $^1\text{H}$  NMR (500 MHz,  $\text{CD}_3\text{CN}$ ) spectrum of  $[\text{Zn}(\text{iXa-2})](\text{OTf})_2$  (**7**).

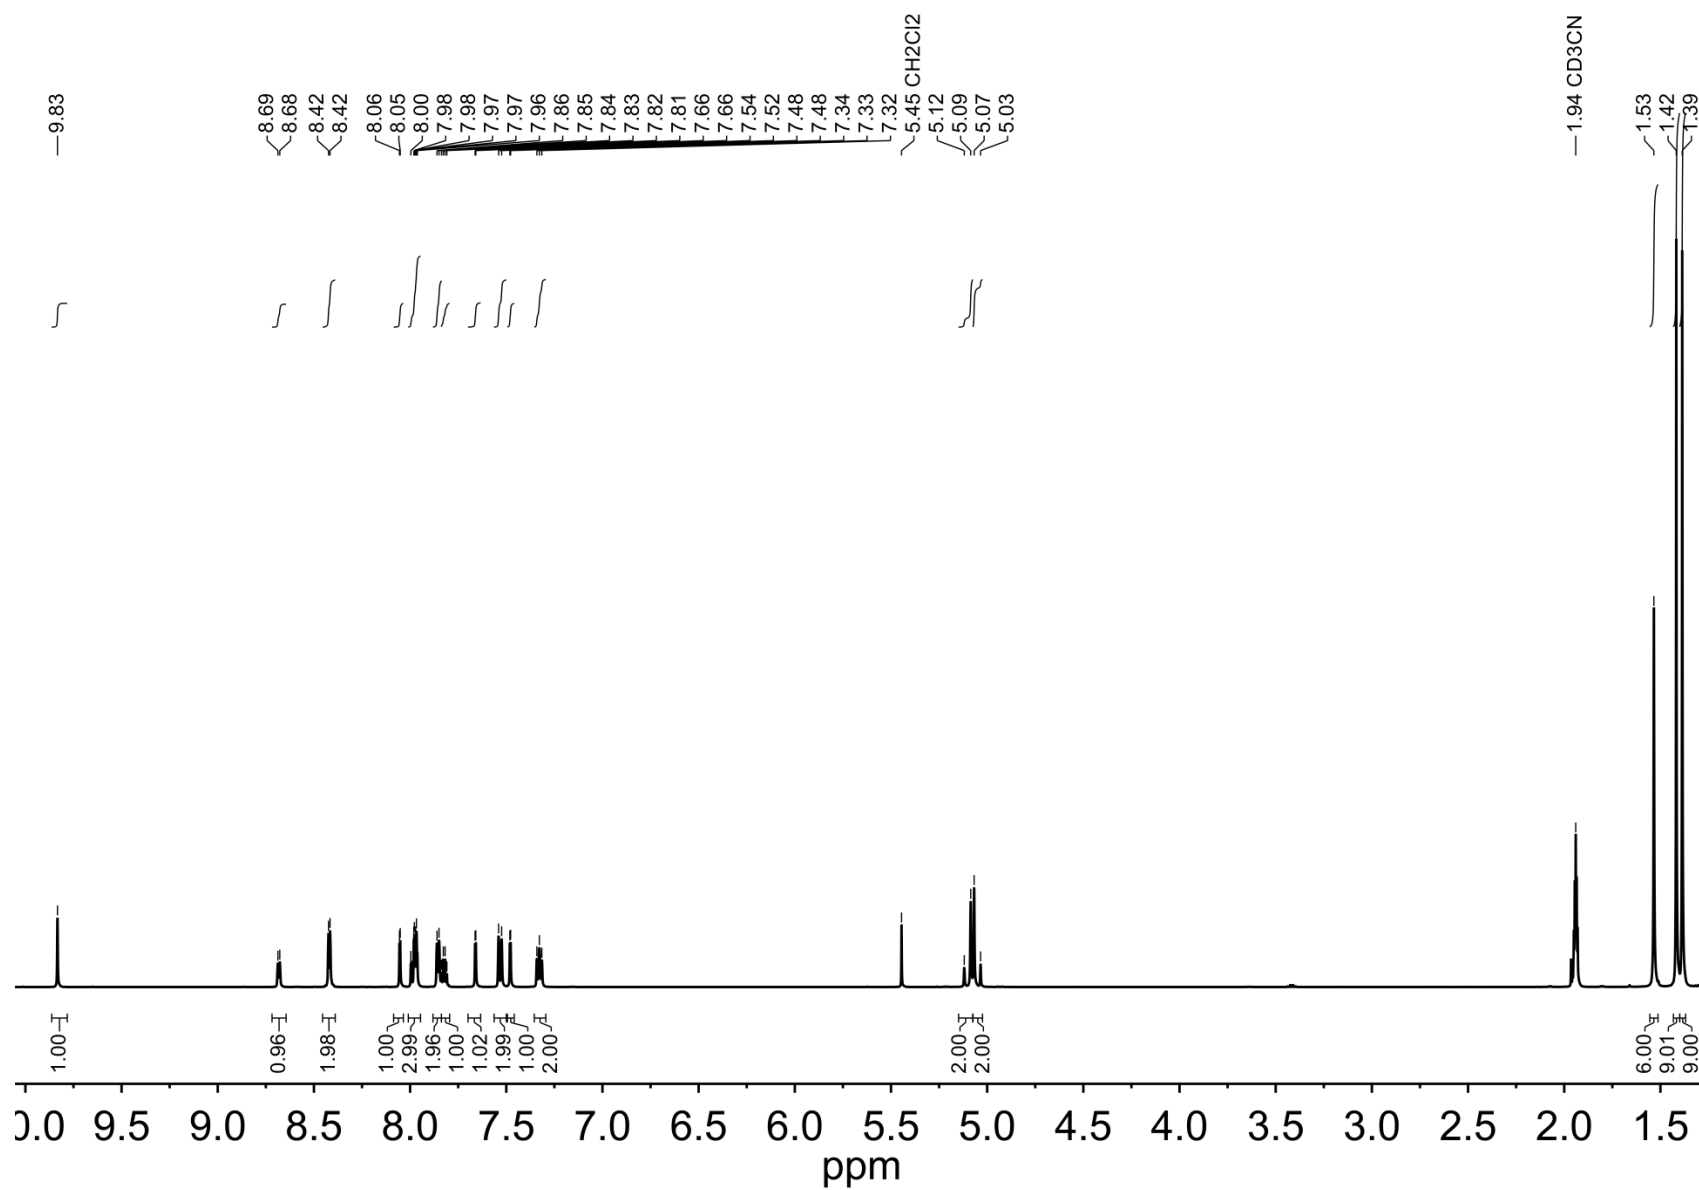

**Figure S27.**  $^{13}\text{C}$  NMR (126 MHz,  $\text{CD}_3\text{CN}$ ) spectrum of  $[\text{Zn}(\text{iXa-2})](\text{OTf})_2$  (**7**).

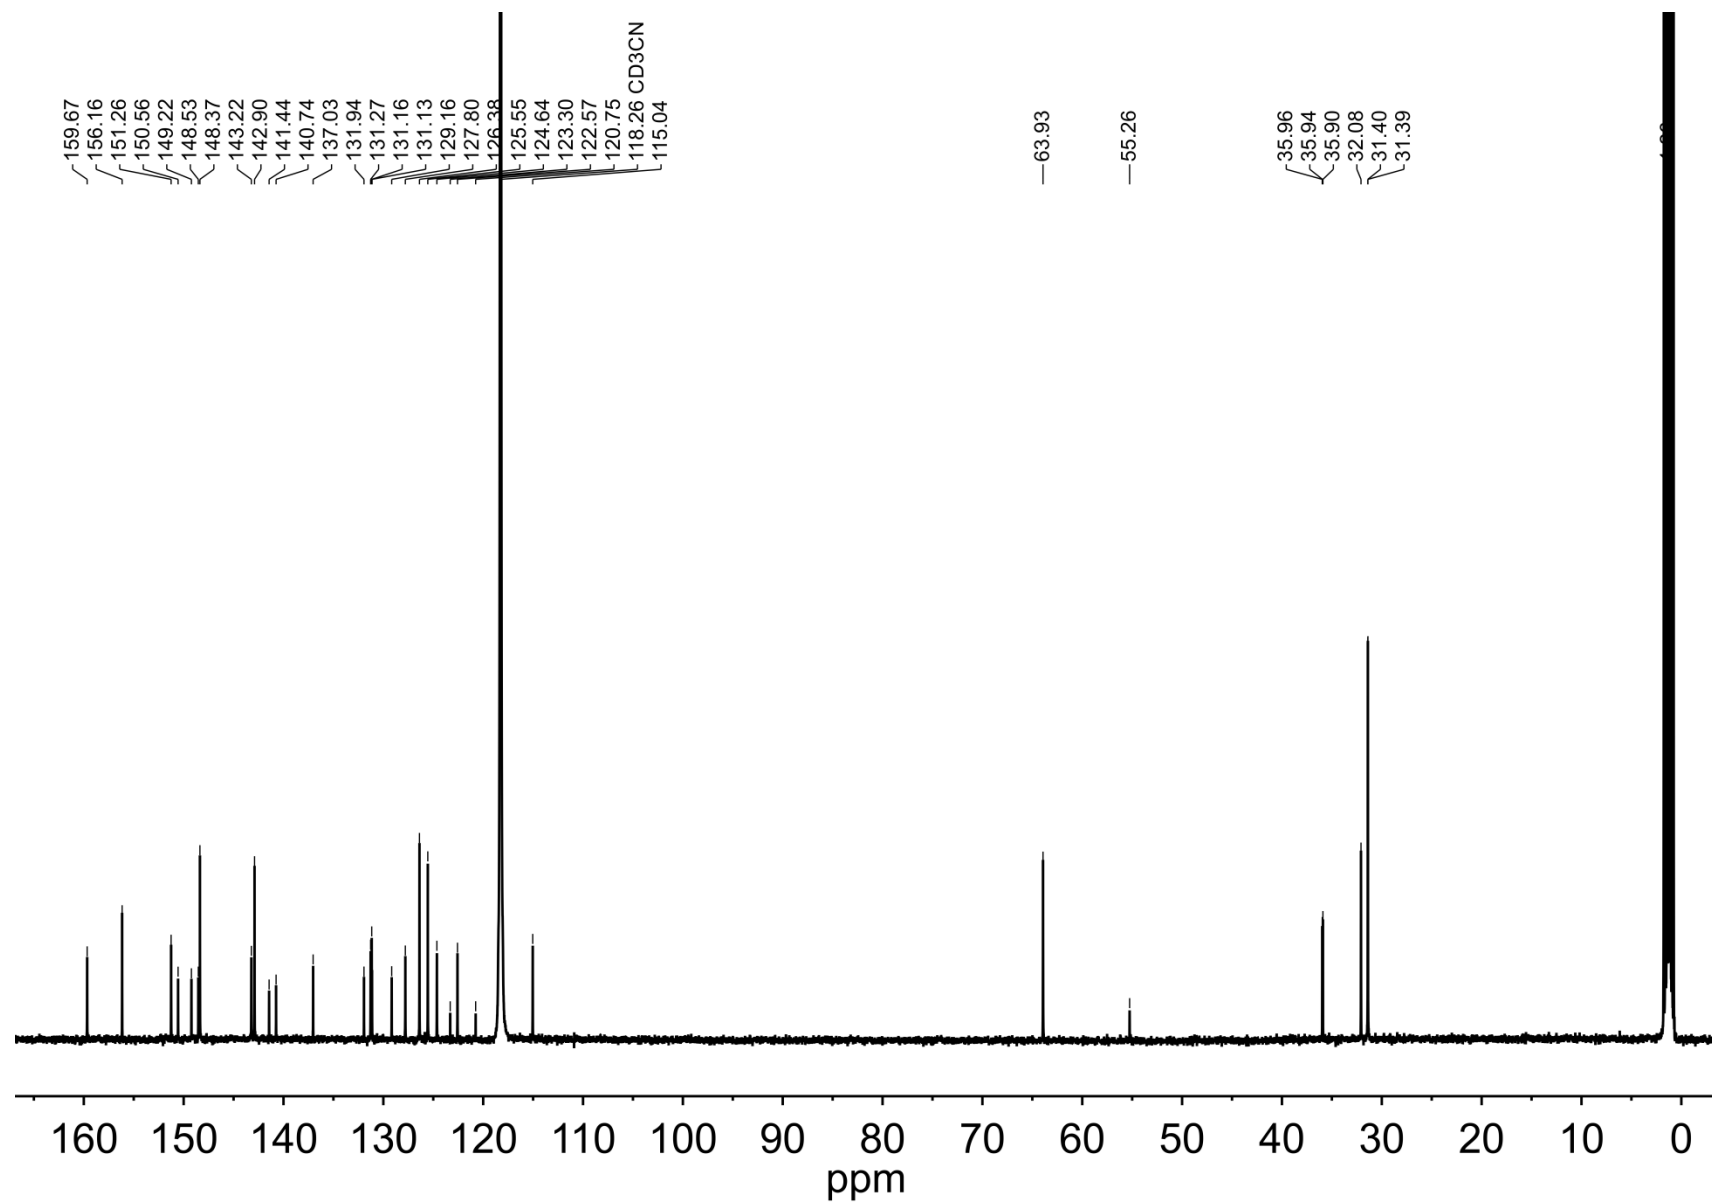

**Figure S28.**  $^1\text{H}$  cosy-NMR spectrum (500 MHz,  $\text{CD}_3\text{CN}$ ) spectrum of  $[\text{Zn}(\text{iXa-2})](\text{OTf})_2$  (**7**).

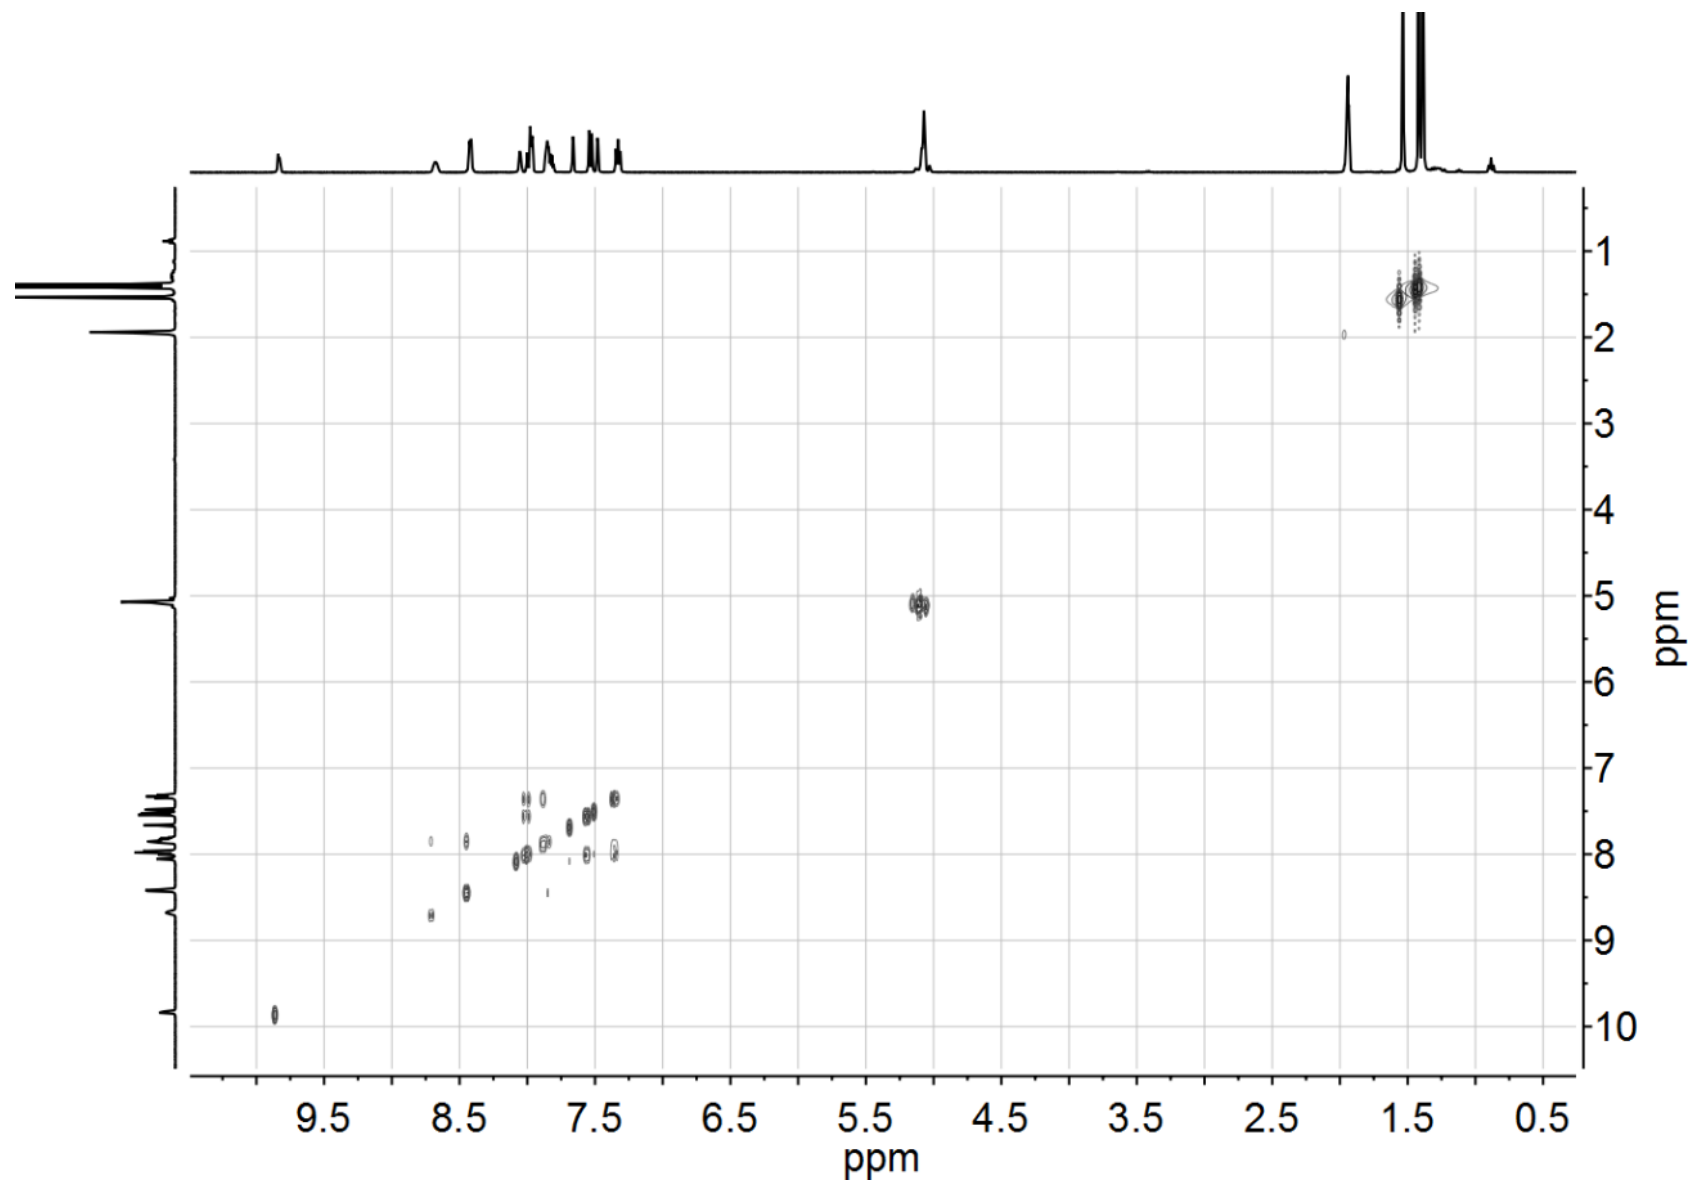

**Figure S29.**  $^1\text{H}$ ,  $^{13}\text{C}$  HSQC-NMR spectrum (500 MHz, 126 MHz,  $\text{CD}_3\text{CN}$ ) spectrum of  $[\text{Zn}(\text{iXa-2})](\text{OTf})_2$  (**7**).

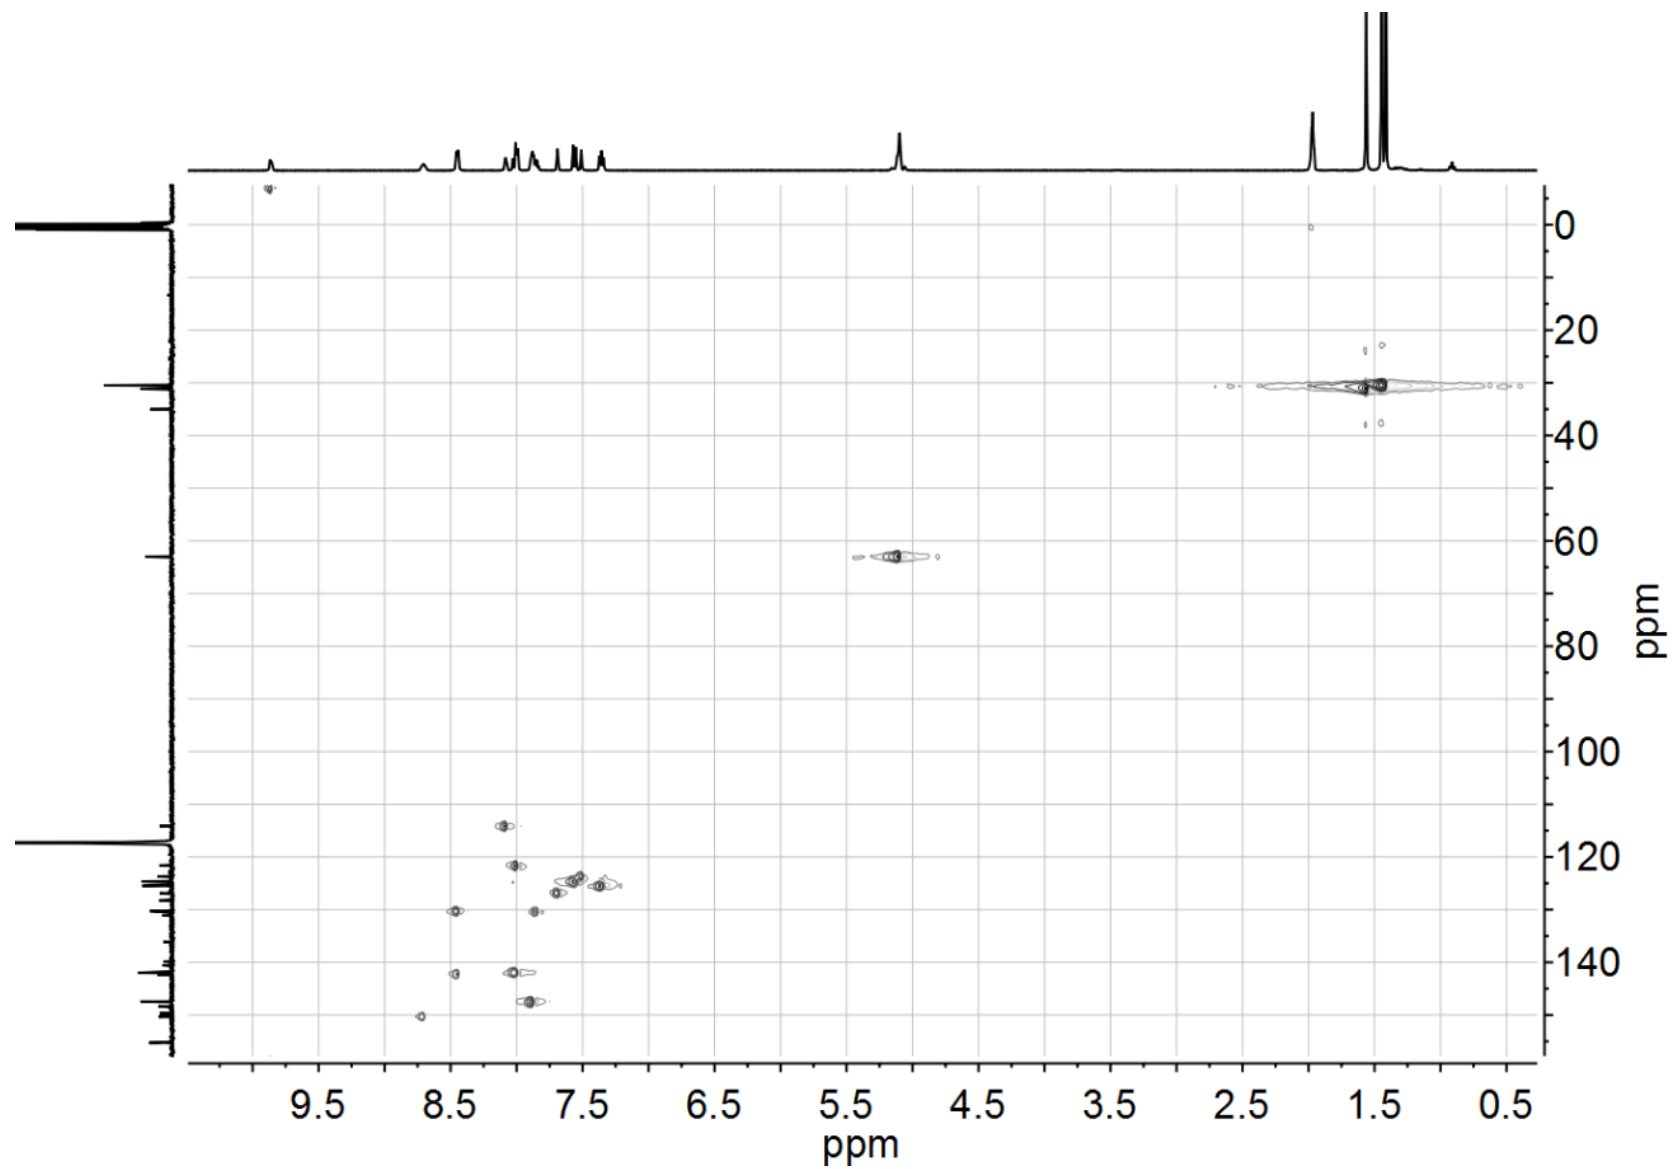

**Figure S30.**  $^1\text{H}$ ,  $^{13}\text{C}$  HMBC-NMR spectrum (500 MHz, 126 MHz,  $\text{CD}_3\text{CN}$ ) spectrum of  $[\text{Zn}(\text{iXa-2})](\text{OTf})_2$  (**7**).

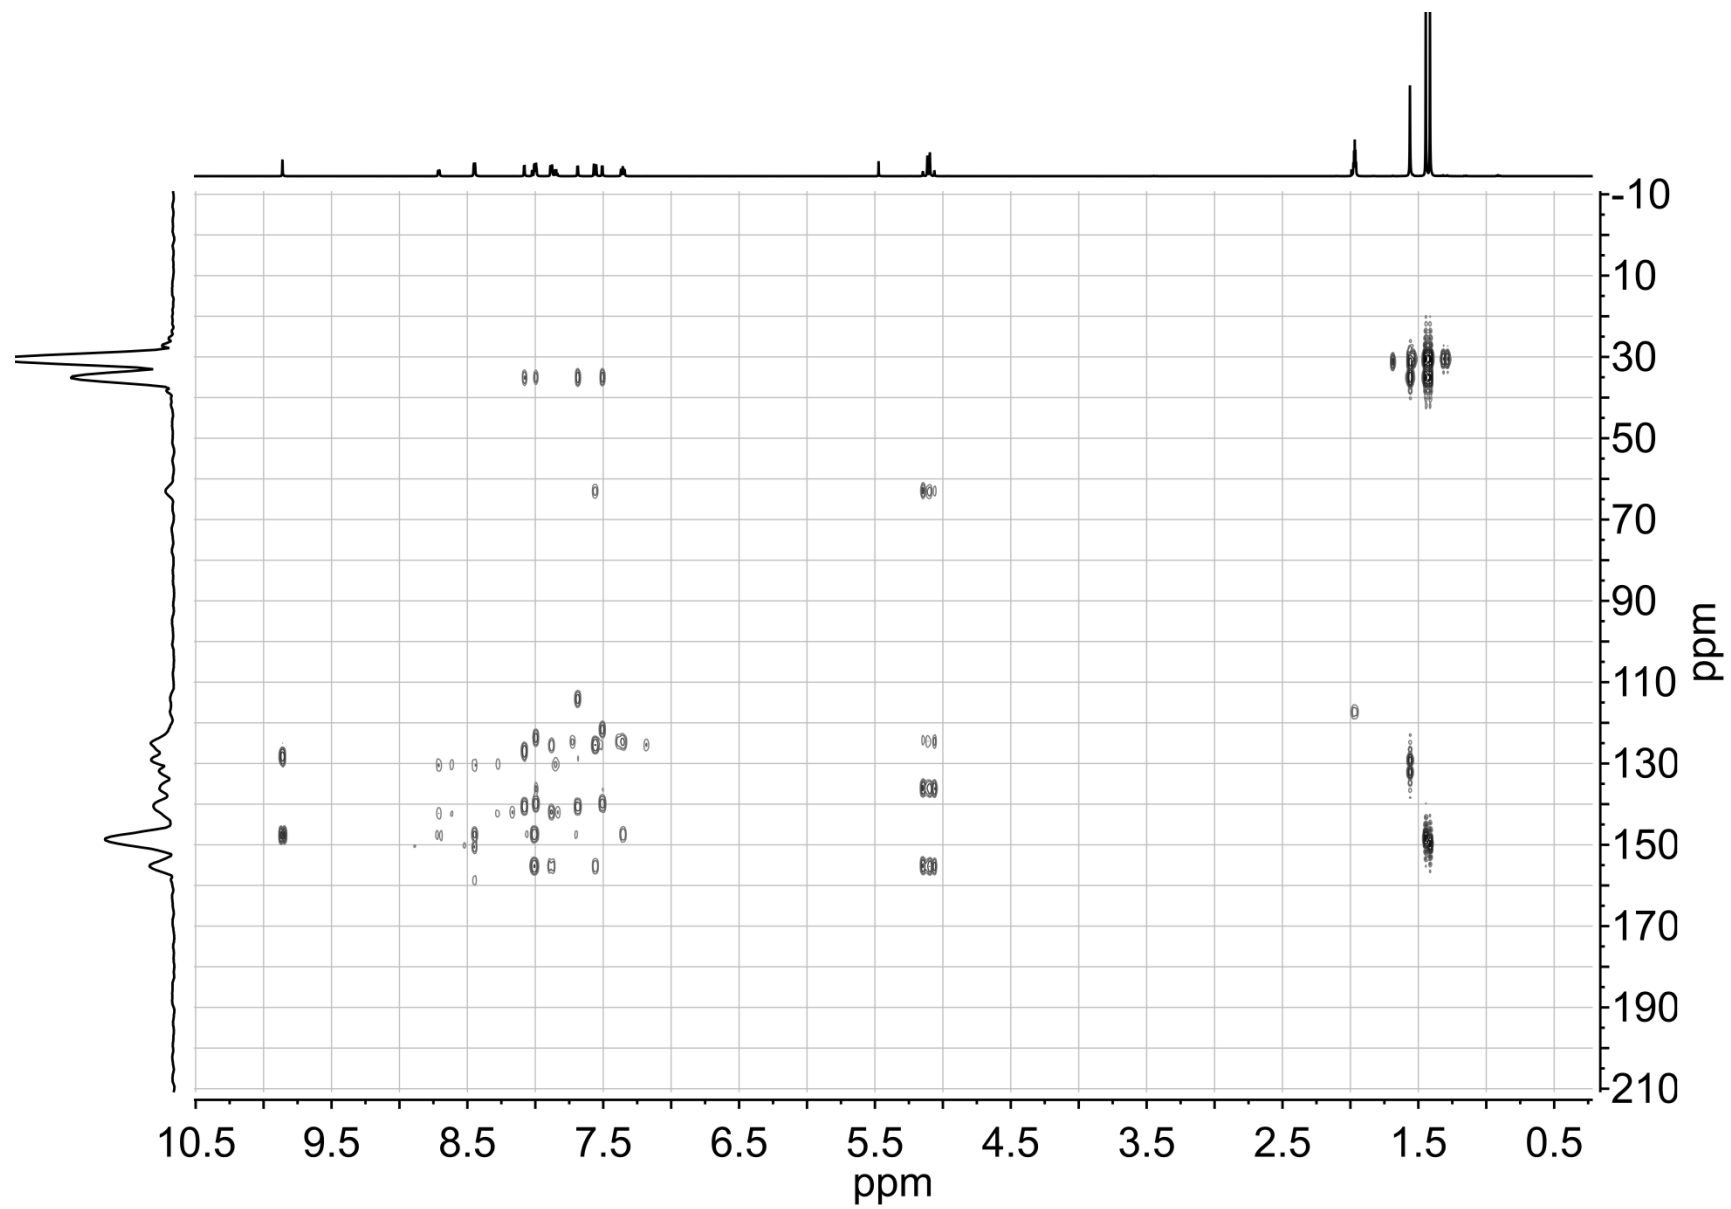

**Table S1.** Select Bond Distances (Å) and angles (°) for **4** - **7**.

| <b>M = Fe or Zn</b>  | <b>4</b>  | <b>5</b>  | <b>6</b>  | <b>7</b>  |
|----------------------|-----------|-----------|-----------|-----------|
| M1–N1                | 2.244(15) | 2.185(11) | 2.136(2)  | 2.169(2)  |
| M1–N2                | 2.246(14) | 2.152(11) | 2.216(2)  | 2.133(2)  |
| M1–N3                | 2.335(14) | 2.308(11) | 2.267(2)  | 2.379(2)  |
| M1–N4                | 2.134(14) | 2.112(14) | 2.096(2)  | 2.045(2)  |
| M1–N5(O2)            | 2.152(15) | 2.103(13) | 2.087(2)  | 2.057(2)  |
| M1–N6(O7)            | 2.329(16) |           | 2.578(2)  |           |
| M1–O1                | 2.380(11) | 2.212(10) | 2.554(2)  | 2.273(2)  |
| N1–M1–N2             | 72.71(5)  | 75.62(4)  | 76.68(7)  | 76.79(7)  |
| N2–M1–O1             | 67.26(4)  | 71.58(4)  | 65.76(6)  | 71.18(6)  |
| O1–M1–N3             | 68.22(4)  | 73.35(4)  | 66.73(6)  | 70.74(6)  |
| N3–M1–N4             | 74.88(5)  | 76.14(5)  | 78.72(7)  | 76.83(8)  |
| N4–M1–N5(O2)         | 163.74(6) | 150.26(5) | 165.14(7) | 150.22(8) |
| N5(O2)–M1–<br>N6(O7) | 81.91(6)  |           | 85.05(5)  |           |
| N6(O7)–M1–N1         | 79.18(5)  |           | 80.60(6)  |           |
| N1–M1–N4             | 93.07(5)  | 93.89(5)  | 94.78(7)  | 99.36(8)  |
| N5(O2)–M1–O1         | 84.27(5)  | 90.75(4)  | 84.27(5)  | 91.98(7)  |
| N4–M1–O1             | 86.71(5)  | 92.97(5)  | 76.20(6)  | 91.48(7)  |
| N4–M1–N6(O7)         | 97.02(5)  |           | 92.70(6)  |           |
| N1–M1–N5(O2)         | 102.60(5) | 98.81(4)  | 99.32(6)  | 93.22(8)  |
| N1–M1–N3             | 150.44(5) | 139.37(4) | 150.59(7) | 141.14(7) |



**Figure S31.** Electronic Spectra of **6** (solid line) and **7** (dashed line) in CH<sub>3</sub>CN.

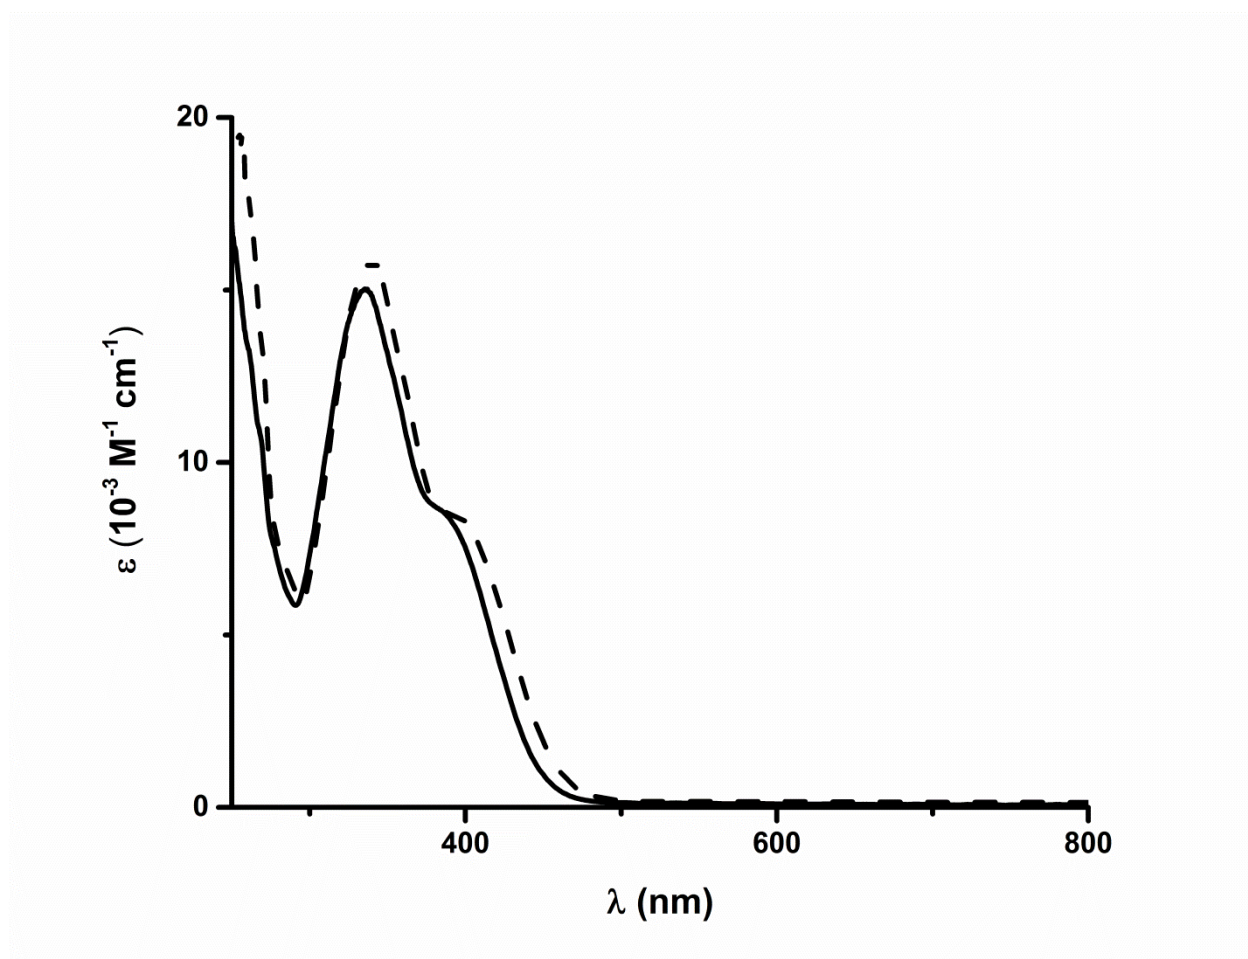

**Figure S32.** Full cyclic voltammograms of Top: the ligands, **iXa-** and **iXa-2**; Bottom: **4**, **5**, **6** and **7**; CH<sub>3</sub>CN, 0.1 V s<sup>-1</sup>, 0.1 M [N(*n*-Bu)<sub>4</sub>]PF<sub>6</sub>.

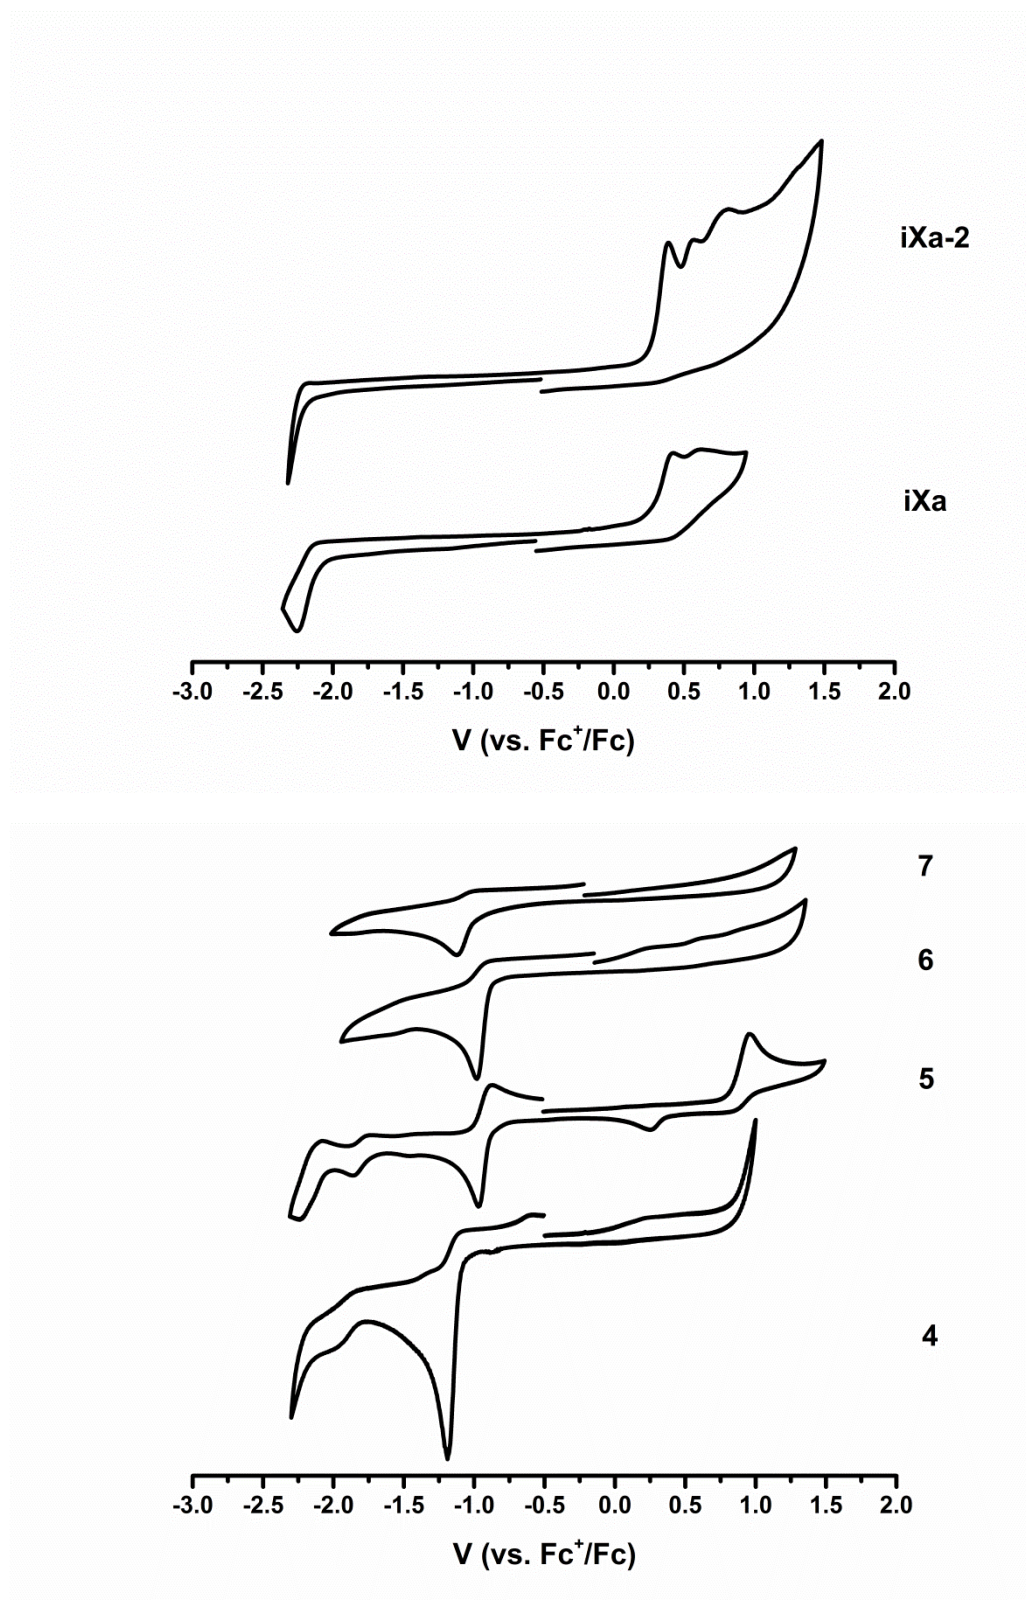

**Figure S33.** Temperature dependence of  $\chi_{\text{mol}}$  of powdered sample **4**. Solid circles represent the experimental data; red line represents the best fit of the data (0.1 T,  $C = 4.52 \text{ cm}^3 \text{ mol}^{-1}$ ,  $\theta = 0.57 \text{ K}$ ).

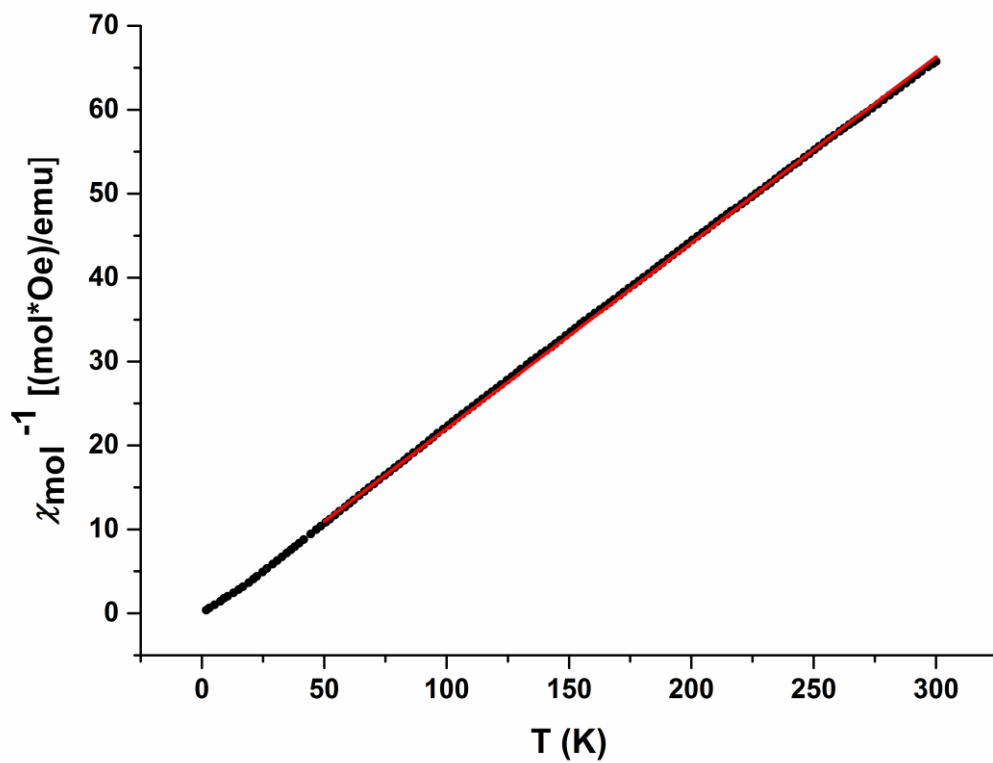

**Figure S34.** Temperature dependence of  $\chi_{mol}$  of powdered sample **5**. Solid circles represent the experimental data; red line represents the best fit of the data (0.1 T,  $C = 3.80 \text{ cm}^3 \text{ mol}^{-1}$ ,  $\theta = 3.33 \text{ K}$ ).

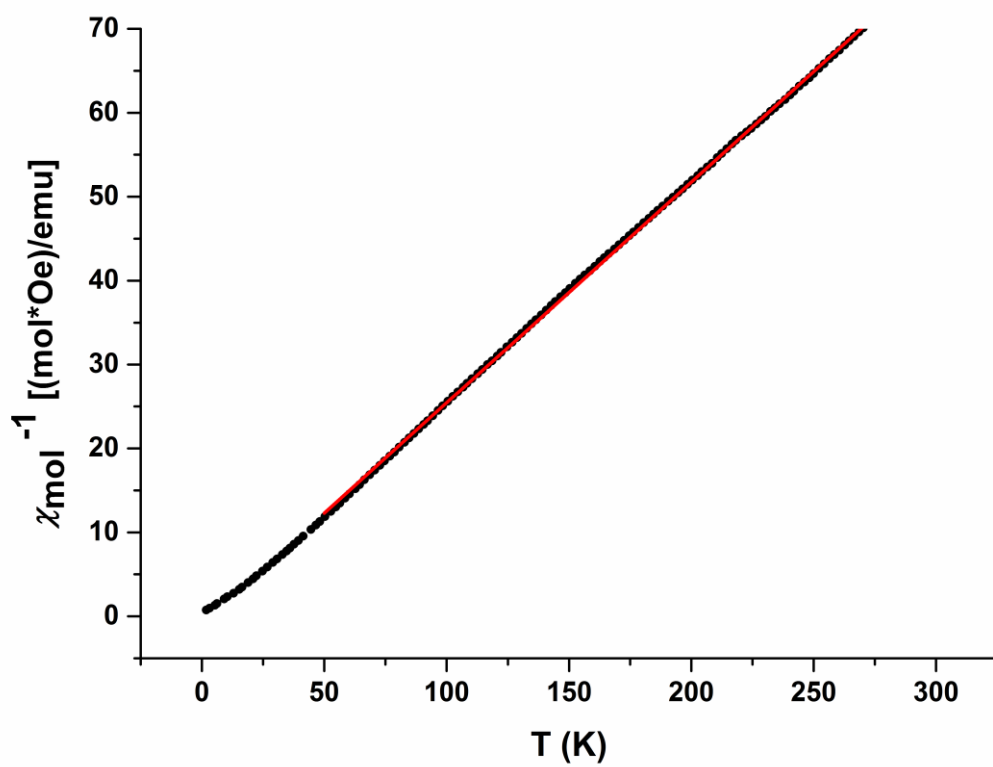

**Figure S35.** Temperature dependence of the magnetic moment ( $\mu_{\text{eff}} (\mu_{\text{B}})$ ) of **4** in  $\text{CH}_3\text{CN}$  (6.2 mM). Solid circles are the experimental data; red line represents the best fit of the data (1 T, solvent:  $\text{CH}_3\text{CN}$ ,  $g_1 = 1.7$ ,  $|D_1| = 4.95 \text{ cm}^{-1}$ ,  $E/D_1 = 0$ ,  $\text{TIP} = 24657 \times 10^{-6} \text{ emu}$ ).

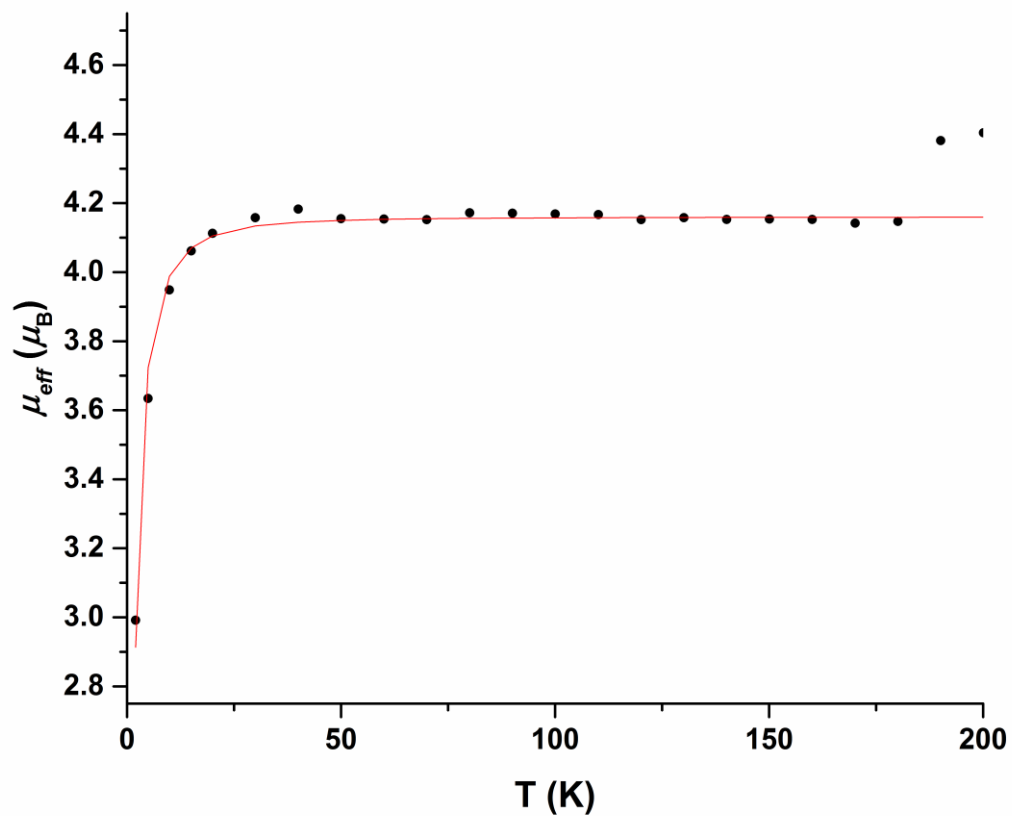

**Figure S36.** Temperature dependence of the magnetic moment ( $\mu_{\text{eff}}(\mu_{\text{B}})$ ) of **5** in  $\text{CH}_3\text{CN}$  (5.7 mM). Solid circles are the experimental data; red line represents the best fit of the data (Solvent:  $\text{CH}_3\text{CN}$ ,  $g_1 = 1.5$ ,  $|D_1| = 5 \text{ cm}^{-1}$ ,  $E/D_1 = 0$ ,  $\text{TIP} = 36000 \times 10^{-6} \text{ emu}$ ).

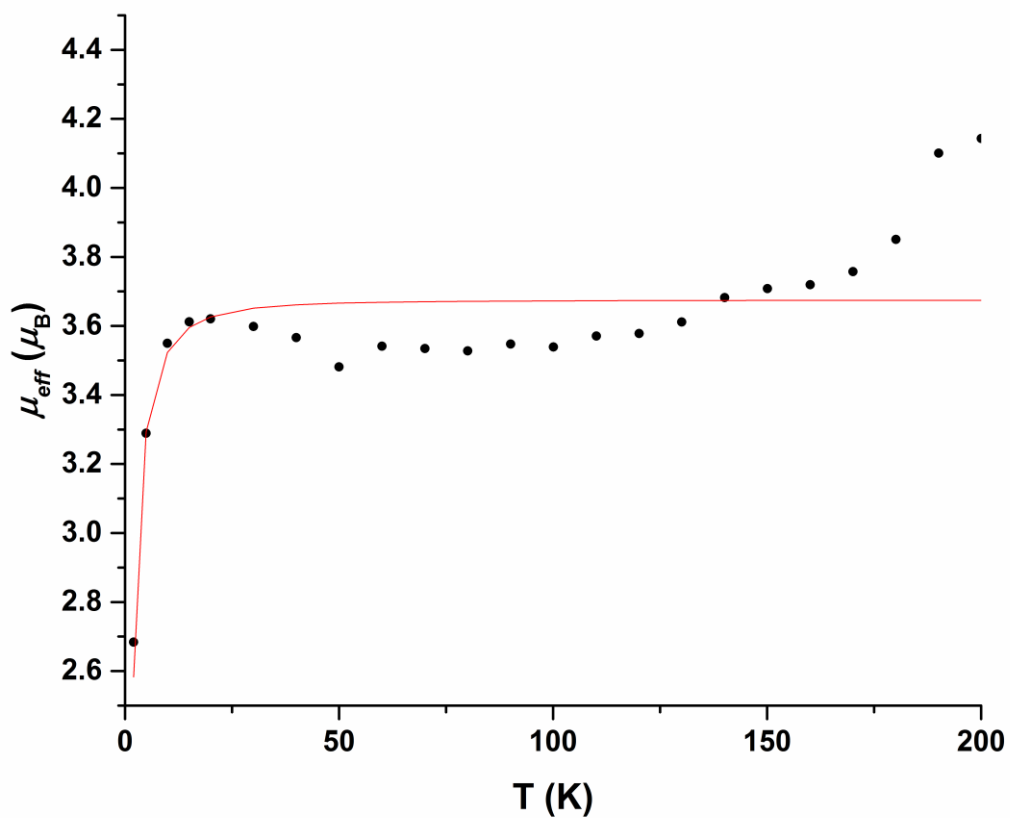

## Treatment of the paramagnetic NMR data

According to eq. 1 the experimental signal shift,  $\delta_T^{\text{exp}}$ , at the temperature  $T$  is the sum of the contact shift,  $\delta_T^{\text{con}}$ , the dipolar shift,  $\delta_T^{\text{dip}}$ , and the diamagnetic shift,  $\delta^{\text{dia}}$ .

$$\delta_T^{\text{exp}} = \delta_T^{\text{con}} + \delta_T^{\text{dip}} + \delta^{\text{dia}} \quad (1)$$

The contact shift, which is relevant for the signal assignment, may be determined by subtracting  $\delta^{\text{dia}}$  (known from the Zn analogue) from  $\delta_T^{\text{exp}}$  if the dipolar shift is small.

For estimating the dipolar shift the rhombic distortion of the compound is neglected so that eq. 2 can be used.<sup>1</sup>

$$\delta_T^{\text{dip}} = \frac{\mu_0}{4\pi} \frac{\beta_e^2}{9k_B T} S(S+1) \frac{3\cos^2\theta-1}{r^3} (g_{\parallel}^2 - g_{\perp}^2) \left[1 - \frac{7(g_{\parallel}^2 + 0.5g_{\perp}^2)}{5(g_{\parallel}^2 - g_{\perp}^2)} \frac{D}{k_B T}\right] \quad (2)$$

Here  $\mu_0$  is the magnetic constant,  $\beta_e$  is the Bohr magneton,  $k_B$  is the Boltzmann constant,  $T$  is the absolute temperature,  $S$  is the spin quantum number,  $r$  is the vector joining a given proton and the iron atom in the crystal,  $\theta$  is the angle between  $r$  and the principal magnetic axis,  $g_{\parallel}$  and  $g_{\perp}$  are the  $g$  factors parallel and perpendicular to the main magnetic axis, respectively, and  $D$  is the zero-field splitting constant. Since Fe(II)  $S = 2$  complexes often have short electron relaxation times and/or large  $D$ -values,  $g$  factors are difficult to obtain from EPR spectra. An example is  $[\text{Fe}(\text{H}_2\text{O})_6](\text{SiF}_6)$  with  $g_{\parallel} = 2.00$ ,  $g_{\perp} = 2.11$ , and  $D = 12 \text{ cm}^{-1}$  (rounded values).<sup>2</sup> Using the crystal structure data of **4** and **5** in Tables S3 and S2, eq. 2 yields the dipolar shifts also listed in these tables. Compared to  $\delta_T^{\text{para}}$  the respective  $\delta_{298}^{\text{dip}}$  values are small except for protons whose paramagnetic shifts are also small (Hf and Hp of **4**). This means that the dipolar shifts can be neglected in most cases and that  $\delta_T^{\text{con}} \approx \delta_T^{\text{exp}} - \delta^{\text{dia}}$  is a reasonable approximation.

The spin densities,  $\rho$ , obtained from DFT calculations are converted into theoretical contact shifts,  $\delta_T^{\text{theor}}$ , by applying eq. (3),<sup>3</sup> where it is assumed that the  $g$ -factor anisotropy is small.

$$\delta_T^{\text{theor}} = \frac{a_0^3 \mu_0 g_{\text{av}}^2 \beta_e^2 (S+1)}{9k_B T} \rho \quad (3)$$

All constants and variables of eq. 3 have been mentioned above except for the Bohr radius,  $a_0$ , and the average  $g$  factor,  $g_{\text{av}}$ . The calculated contact shifts are listed in Table S2 and S3. Due to the approximations used the correlation between  $\delta_T^{\text{para}}$  and  $\delta_T^{\text{theor}}$  is not ideal. In this context, it is worth noting that the corresponding data of Hf and Hp of **4** exhibit no special behaviour although their dipolar shifts might not be negligible.

For the final signal assignment the intensities and the half widths,  $\Delta$ , have been considered. The signal half width criterion assumes that the signal broadening is dominated by dipolar relaxation so that the signals become broader when the Fe...H distance decreases ( $\Delta \propto r^{-6}$ ).<sup>3</sup>

**Table S2.** Parameters used to assign the  $^1\text{H}$  NMR signals of **5**.

| Label           | Spin $\rho$<br>[a]<br>$\times 10^{-3}$<br>[a.u.] | $\delta^{\text{exp}}_{298}$<br>rel.<br>TMS<br>[ppm] | Integral<br>expl. | Half-<br>width<br>$\Delta$ [Hz] | Fe...H<br>distance<br>$r$ [Å] | Angle<br>$\theta$ [deg] | $\delta^{\text{dip}}_{298}$<br>[ppm] | $\delta^{\text{dia}}$<br>from <b>7</b><br>[ppm] | $\delta^{\text{para}}_{298}$<br>[ppm] | $\delta^{\text{theor}}_{298}$<br>[ppm] |
|-----------------|--------------------------------------------------|-----------------------------------------------------|-------------------|---------------------------------|-------------------------------|-------------------------|--------------------------------------|-------------------------------------------------|---------------------------------------|----------------------------------------|
| H <sub>e</sub>  | 0.8713                                           | 224                                                 | [b]               | 260                             | 3.874                         | 105.8                   | 1.3                                  | 9.83                                            | 214                                   | 227                                    |
| H <sub>a</sub>  | 0.3283                                           | 140                                                 | 1.0               | 600                             | 3.265                         | 90.6                    | 2.9                                  | 8.69                                            | 131                                   | 86                                     |
| H <sub>n</sub>  | 0.3135                                           | 123                                                 | 2.1               | 950                             | 3.564                         | 56.1                    | 0.1                                  | 5.06 <sup>[e]</sup>                             | 118                                   | 114                                    |
| H <sub>r</sub>  | 0.4385                                           | 81                                                  | 2.2               | 720                             | 3.093                         | 40.1                    | -2.5                                 | 7.86                                            | 73                                    | 82                                     |
| H <sub>o</sub>  | 0.1410                                           | 54.8                                                | 2.8               | 75                              | 5.029                         | 24.2                    | -1.2                                 | 7.53                                            | 47.3                                  | 36.7                                   |
| H <sub>q</sub>  | 0.0675                                           | 51.9                                                | 2.9               | 60                              | 5.091                         | 23.1                    | -1.2                                 | 7.33                                            | 44.6                                  | 17.6                                   |
| H <sub>d</sub>  | 0.1960                                           | 50.3                                                | 1.5               | 55                              | 5.034                         | 104.1                   | 0.6                                  | 8.42                                            | 41.9                                  | 51.1                                   |
| H <sub>b</sub>  | 0.1598                                           | 49.2                                                | 1.4               | 55                              | 5.234                         | 95.6                    | 0.7                                  | 7.83                                            | 41.4                                  | 41.6                                   |
| H <sub>n'</sub> | 0.0655                                           | 42                                                  | 1.8               | 1000                            | 3.174                         | 53.3                    | -0.2                                 | 5.11 <sup>[e]</sup>                             | 37                                    | 17                                     |
| H <sub>j</sub>  | 0.0333                                           | 17.0                                                | 1.6               | 20                              | 6.364                         | 89.5                    | 0.4                                  | 7.48                                            | 9.5                                   | 8.7                                    |
| H <sub>h</sub>  | 0.0038                                           | 15.7                                                | 1.4               | 30                              | 6.346                         | 99.6                    | 0.4                                  | 7.66                                            | 8.0                                   | 1.0                                    |
| H <sub>l</sub>  | 0.0038                                           | 15.1                                                | 1.5               | 25                              | 4.896                         | 82.5                    | 0.8                                  | 7.98                                            | 7.1                                   | 1.0                                    |
| H <sub>f</sub>  | -0.0083                                          | 4.5                                                 | 1.8               | 55                              | 4.845                         | 105.4                   | 0.7                                  | 8.06                                            | -3.6                                  | -2.1                                   |
| H <sub>p</sub>  | -0.0118                                          | 2.3                                                 | 2.9               | 35                              | 5.829                         | 1.1                     | -1.0                                 | 8.01                                            | -5.7                                  | -3.1                                   |
| H <sub>g</sub>  | 0.0020                                           | 1.1                                                 | 13.2              | 15                              | 7.853                         | [c]                     | [d]                                  | 1.42                                            | -0.3                                  | 0.1                                    |
| H <sub>k</sub>  | 0.0005                                           | 0.4                                                 | 13.2              | 15                              | 7.800                         | [c]                     | [d]                                  | 1.39                                            | -1.0                                  | 0.5                                    |
| H <sub>i</sub>  | 0.0000                                           | -0.4                                                | 8.6               | 20                              | 6.451                         | [c]                     | [d]                                  | 1.53                                            | -1.9                                  | 0.0                                    |
| H <sub>c</sub>  | -0.0653                                          | -0.9                                                | 1.3               | 55                              | 5.915                         | 100.9                   | 0.4                                  | 8.42                                            | -9.3                                  | -17.0                                  |

[a] Spin per unpaired electron. [b] Not determined. [c] Not determined; see also next footnote. [d] Owing to the large distances  $r$  the dipolar shifts should be very small. For this reason the averaging of the angle  $\theta$  of the methyl and *tert*-butyl groups has been abandoned. [e] Interchange of H<sub>n</sub> and H<sub>n'</sub> not excluded.



**Table S3.** Parameters used to assign the  $^1\text{H}$  NMR signals of **4**.

| Label           | Spin $\rho$<br>[a]<br>$\times 10^{-3}$<br>[a.u.] | $\delta^{\text{exp}}_{298}$<br>rel.<br>TMS<br>[ppm] | Integral<br>expl. | Half-<br>width<br>$\Delta$ [Hz] | Fe...H<br>distance<br>$r$ [Å] | Angle<br>$\theta$ [deg] | $\delta^{\text{dip}}_{298}$<br>[ppm] | $\delta^{\text{dia}}$<br>from <b>6</b><br>[ppm] | $\delta^{\text{para}}_{298}$<br>[ppm] | $\delta^{\text{theor}}_{298}$<br>[ppm] |
|-----------------|--------------------------------------------------|-----------------------------------------------------|-------------------|---------------------------------|-------------------------------|-------------------------|--------------------------------------|-------------------------------------------------|---------------------------------------|----------------------------------------|
| H <sub>e</sub>  | 0.6425                                           | 297                                                 | [b]               | 650                             | 3.874                         | 107.59                  | 1.8                                  | 9.39                                            | 288                                   | 276.8                                  |
| H <sub>r</sub>  | 0.3125                                           | 147                                                 | 1                 | 780                             | 3.265                         | 39.07                   | -2.7                                 | 7.79                                            | 139                                   | 134.6                                  |
| H <sub>n</sub>  | 0.2750                                           | 130                                                 | 0.8               | 1200                            | 3.564                         | 59.11                   | 0.5                                  | 5.08                                            | 125                                   | 118.5                                  |
| H <sub>a</sub>  | 0.2550                                           | 96                                                  | 0.9               | 920                             | 3.093                         | 79.66                   | 2.5                                  | 8.66                                            | 87                                    | 109.8                                  |
| H <sub>d</sub>  | 0.1500                                           | 85                                                  | 1                 | 490                             | 5.029                         | 104.7                   | 0.6                                  | 8.27                                            | 77                                    | 64.6                                   |
| H <sub>b</sub>  | 0.1250                                           | 63.6                                                | 1.2               | 380                             | 5.091                         | 86.7                    | 0.7                                  | 7.66                                            | 55.9                                  | 53.8                                   |
| H <sub>o</sub>  | 0.1175                                           | 62.9                                                | 1.2               | 350                             | 5.034                         | 25.0                    | -1.1                                 | 7.36                                            | 55.5                                  | 50.6                                   |
| H <sub>q</sub>  | 0.0850                                           | 52.7                                                | 1.3               | 130                             | 5.234                         | 22.1                    | -1.2                                 | 7.30                                            | 45.4                                  | 36.6                                   |
| H <sub>j</sub>  | 0.0225                                           | 22.3                                                | 0.9               | 440                             | 3.174                         | 83.0                    | 0.3                                  | 7.33                                            | 15.0                                  | 9.7                                    |
| H <sub>g</sub>  | 0.0010                                           | 1.2                                                 | 11                | 15                              | 7.929                         | [c]                     | [d]                                  | 1.34                                            | -0.1                                  | 0.4                                    |
| H <sub>k</sub>  | -0.0005                                          | -2.5                                                | 11                | 10                              | 7.734                         | [c]                     | [d]                                  | 1.29                                            | -3.8                                  | -0.2                                   |
| H <sub>i</sub>  | 0                                                | -4.8                                                | 6.4               | 40                              | 6.752                         | [c]                     | [d]                                  | 1.68                                            | -6.4                                  | 0                                      |
| H <sub>i'</sub> | -0.0005                                          |                                                     |                   |                                 | 6.520                         | [c]                     | [d]                                  | 1.39                                            |                                       | -0.2                                   |
| H <sub>c</sub>  | -0.0275                                          | -12.3                                               | 0.4               | 260                             | 5.972                         | 97.1                    | 0.4                                  | 8.20                                            | -20.5                                 | -11.8                                  |
| H <sub>m</sub>  | -0.0975                                          | -58                                                 | [b]               | 2900                            | 2.699                         | 90.1                    | 5.1                                  | 5.65                                            | -64                                   | -42.0                                  |

[a] Spin per unpaired electron. [b] Not determined. [c] Not determined; see also next footnote. [d] Owing to the large distances,  $r$ , the dipolar shifts should be very small. For this reason the averaging of the angle  $\theta$  of the methyl and *tert*-butyl groups has been abandoned.

**Figure S37.** Qualitative MO diagram from DFT calculations (B3LYP) on the non-optimized, crystallographically determined structure of **4**.

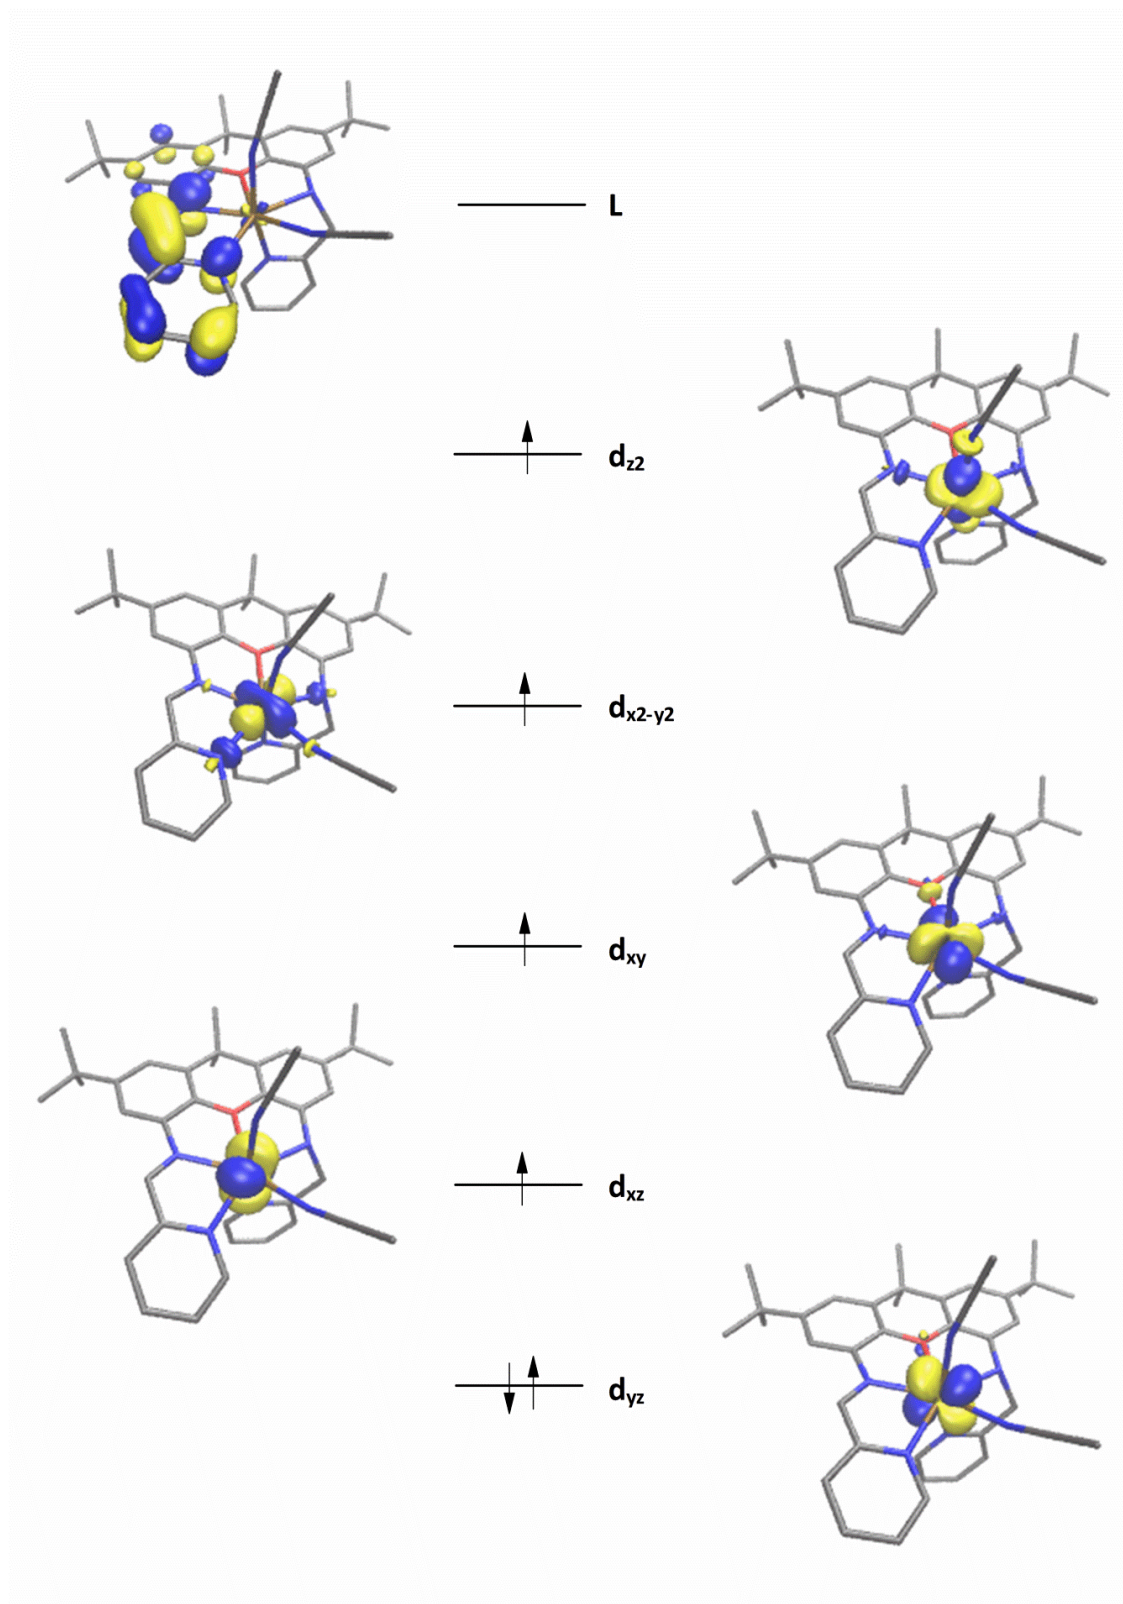

**Figure S38.** Qualitative MO diagram from DFT calculations (B3LYP) on the non-optimized, crystallographically determined structure of **5**.

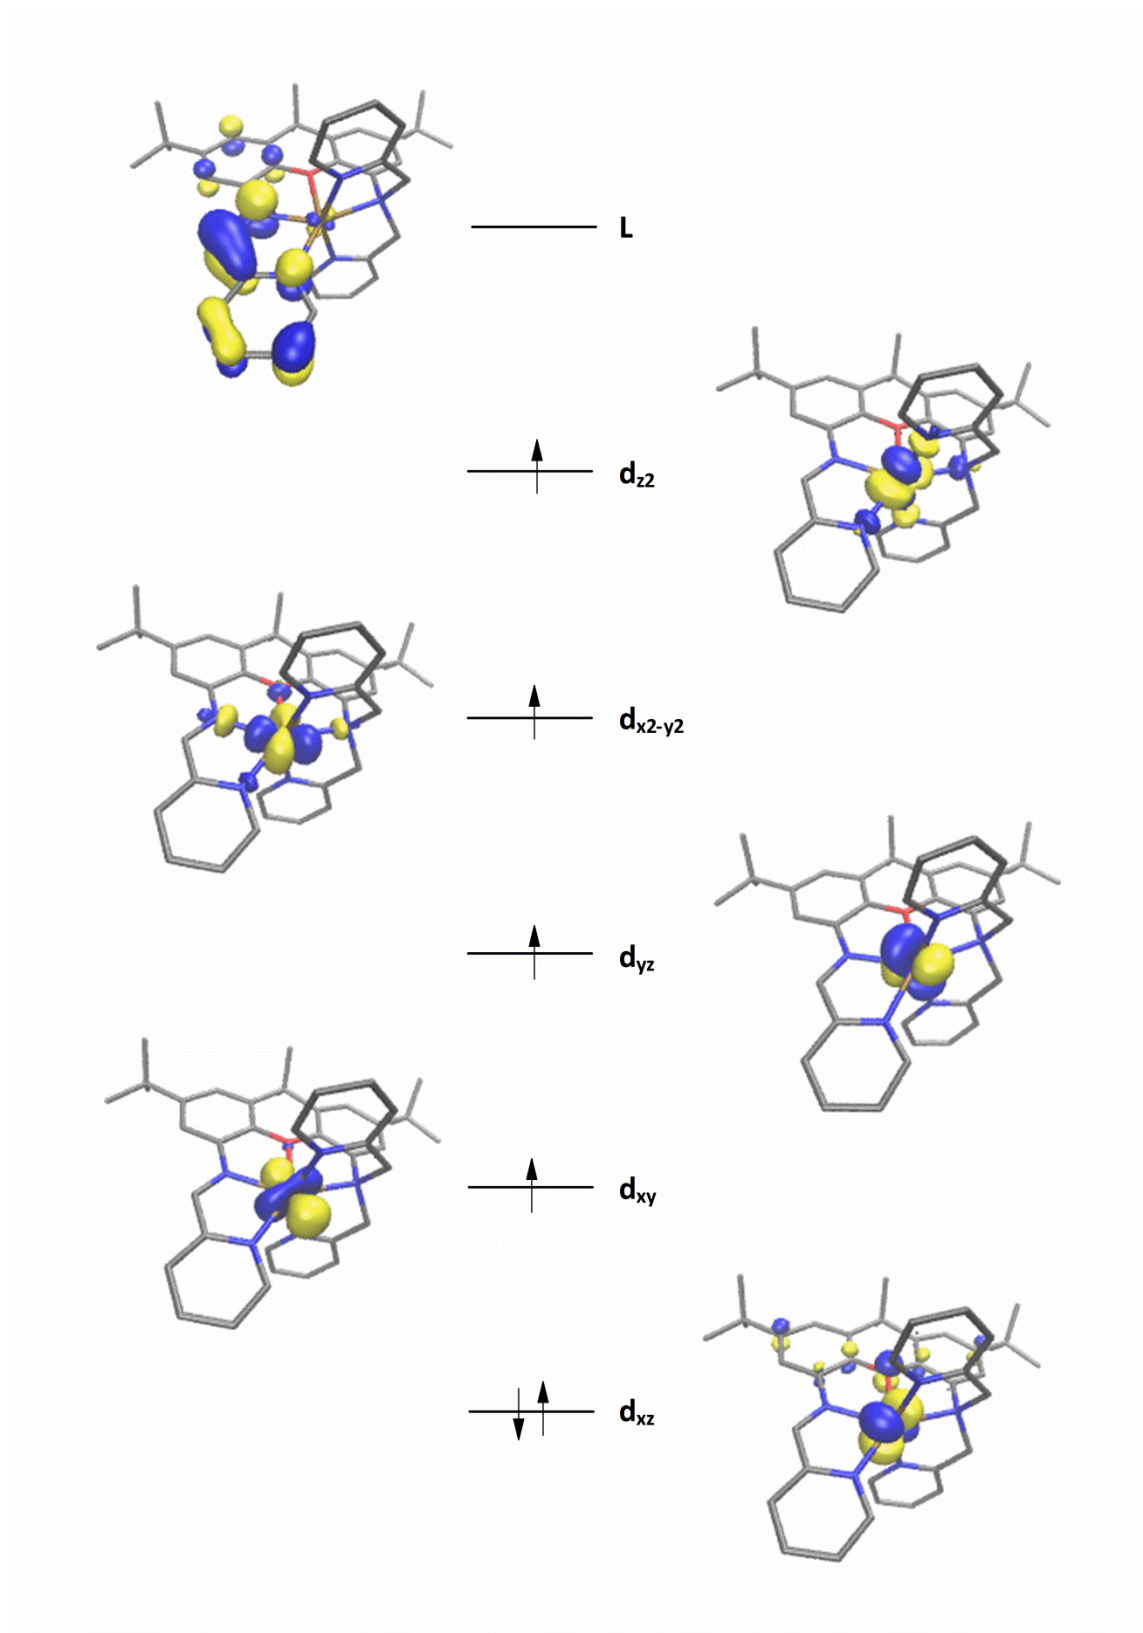

## References

1. R. Acerete, N. Casan-Pastor, J. Bas-Serra and L. C. W. Baker, *J. Am. Chem. Soc.*, **1989**, *111*, 6049-6056.
2. J. Krzystek, D. Smirnov, C. Schlegel, J. van Slageren, J. Telser and A. Ozarowski, *J. Magn. Reson.*, **2011**, *213*, 158-165.
3. F. H. Köhler, in *Magnetism: Molecules to Materials*, Wiley-VCH, Weinheim, Germany, **2001**, vol. 1, ch. 12.
